# Supplementary material for: Palladium-catalysed dearomative aryl/cycloimidoylation of indoles
Source: Royal Society of Chemistry journal article supplement (doi:10.1039/d0cc00402b), 2020-01-01

**SUPPORTING INFORMATION**

**Palladium-Catalyzed Dearomative Aryl/Cycloimidoylation of Indoles**

Jian Wang,<sup>\*a†</sup> Yuan Liu,<sup>a†</sup> Zhuang Xiong,<sup>b</sup> Ling Zhong,<sup>a</sup> Shumin Ding,<sup>a</sup> Lianjie Li,<sup>a</sup> Haixia Zhao,<sup>a</sup> Chen Chen,<sup>a</sup> and Yongjia Shang<sup>\*a</sup>

**Contents**

|                                                                                       |    |
|---------------------------------------------------------------------------------------|----|
| I. General Information .....                                                          | 2  |
| II. Preparation of Starting Materials .....                                           | 2  |
| III. General Procedures of Pd-Catalyzed Imidoylative Dearomatization of Indoles ..... | 4  |
| IV. Proposed mechanism of the formation of 5a. ....                                   | 5  |
| V. Characterization Data .....                                                        | 6  |
| VI. Diversifications .....                                                            | 21 |
| VII. References .....                                                                 | 23 |
| VIII. Copies of <sup>1</sup> H and <sup>13</sup> C NMR Spectra .....                  | 24 |

## I. General Information

$^1\text{H}$  NMR (400 MHz) and  $^{13}\text{C}$  NMR (100 MHz) were registered on 400 M spectrometers. Chemical shifts were reported in units (ppm) by assigning  $\text{CDCl}_3$  resonance in the  $^1\text{H}$  spectrum as 7.26 ppm,  $\text{CDCl}_3$  resonance in the  $^{13}\text{C}$  spectrum as 77.16 ppm,  $\text{DMSO}-d_6$  resonance in the  $^1\text{H}$  spectrum as 2.5 ppm,  $\text{DMSO}-d_6$  resonance in the  $^{13}\text{C}$  spectrum as 39.52 ppm. All coupling constants (J values) were reported in Hertz (Hz). NMR analysis was carried out at 298 K unless noted otherwise. HRMS was obtained on an ESI-LC-MS/MS spectrometer.

## II. Preparation of Starting Materials

The starting materials N-(2-bromobenzoyl)indoles were synthesized following the procedure of Jia<sup>[1]</sup> and Lautens<sup>[2]</sup>, diethyl 2-allyl-2-isocyanomalonate were synthesized following the procedure of Dietrich<sup>[3]</sup>, ethyl 2-isocyano-3,3-diphenylacrylate were synthesized following the procedure of Xu<sup>[4]</sup>, and the data was in accordance with that of the reported literature.

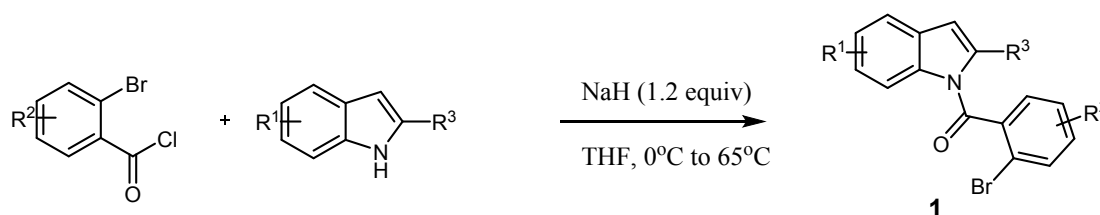

**General procedure:** A 60% dispersion of NaH in mineral oil (1.2 equiv) was added to a stirred solution of the appropriate indole derivative (1 equiv,  $\sim 0.5$  M) in THF at 0 °C and the corresponding solution was stirred for 5 minutes before warming to room temperature where it was stirred for 30 minutes. The solution of the sodium indolate was re-cooled to 0 °C at which time a solution of appropriate 2-bromobenzoyl chloride derivative (2 equiv or 2.2 equiv,  $\sim 1$  M) in THF was added dropwise. Once the addition was complete, the reaction was allowed to warm to room temperature and then was stirred at 65 °C for 30 minutes. At this time the extent of completion of the reaction was determined by conversion of the indole derivative by TLC analysis. The reaction was cooled to room temperature and quenched with a saturated solution of  $\text{NH}_4\text{Cl}$ . The reaction mixture was then diluted with water and EtOAc, and after separating the layers, the aqueous layer was extracted with EtOAc (3x). The combined organic layers were washed sequentially with water and brine, dried over sodium sulfate, filtered and concentrated under reduced pressure. The crude N-(2-bromobenzoyl)indole derivative was purified by flash column Si gel chromatography using the indicated solvent system.

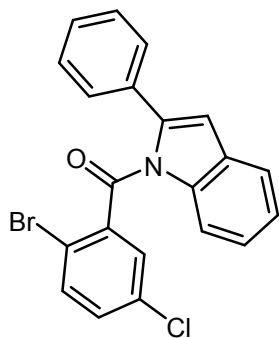

**(2-bromo-5-chlorophenyl)(2-phenyl-1H-indol-1-yl)methanone (1a)**

white solid, MP = 156-157 °C.  $^1\text{H}$  NMR (400 MHz,  $\text{CDCl}_3$ )  $\delta$  8.30 (d,  $J$  = 8.0 Hz, 1H), 7.62 (d,  $J$  = 6.8 Hz, 1H), 7.43 – 7.34 (m, 2H), 7.25 (dd,  $J$  = 8.0, 1.6 Hz, 2H), 7.21 – 7.12 (m, 4H), 7.10 (d,  $J$  = 2.4 Hz, 1H), 6.94 (dd,  $J$  = 8.4, 2.4 Hz, 1H), 6.67 (s, 1H).  $^{13}\text{C}$  NMR (100 MHz,  $\text{CDCl}_3$ )  $\delta$  166.93, 140.22, 138.73, 137.92, 134.21, 133.12, 132.80, 131.53, 130.89, 129.59, 129.11, 128.15, 127.94, 125.49, 124.50, 120.78, 119.10, 115.73, 112.17.

HRMS (ESI) Calc. for  $\text{C}_{21}\text{H}_{13}\text{BrClNO}$  [M+H]: 409.9942; found: 409.9948.

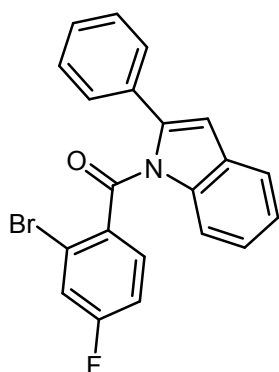

**(2-bromo-4-fluorophenyl)(2-phenyl-1H-indol-1-yl)methanone (1b)**

white solid, MP = 128-129 °C.  $^1\text{H}$  NMR (400 MHz,  $\text{CDCl}_3$ )  $\delta$  8.22 (d,  $J$  = 8.0 Hz, 1H), 7.63 (d,  $J$  = 7.2 Hz, 1H), 7.44 – 7.32 (m, 2H), 7.27 (dd,  $J$  = 7.6, 1.6 Hz, 2H), 7.22 – 7.11 (m, 4H), 7.03 (dd,  $J$  = 8.0, 2.4 Hz, 1H), 6.78 (td,  $J$  = 8.4, 2.4 Hz, 1H), 6.68 (s, 1H).  $^{13}\text{C}$  NMR (100 MHz,  $\text{CDCl}_3$ )  $\delta$  167.43, 163.1 (d,  $J$  = 255.1 Hz), 140.41, 137.93, 133.92, 133.88, 132.83, 132.66 (d,  $J$  = 9.2 Hz), 129.53, 128.89, 127.96, 127.94, 125.27, 124.23, 122.40 (d,  $J$  = 9.8 Hz), 120.75, 120.58 (d,  $J$  = 24.6 Hz), 115.33, 114.29 (d,  $J$  = 21.2 Hz), 111.68.

HRMS (ESI) Calc. for  $\text{C}_{21}\text{H}_{13}\text{BrFNO}$  [M+H]: 395.0237; found: 394.0238.

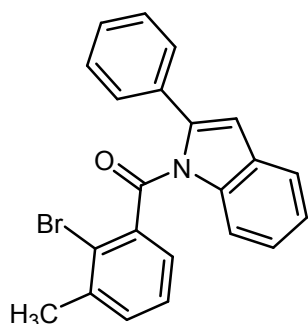

**(2-bromo-3-methylphenyl)(2-phenyl-1H-indol-1-yl)methanone (1c)**

white solid, MP = 131-132 °C.  $^1\text{H}$  NMR (400 MHz,  $\text{CDCl}_3$ )  $\delta$  8.17 (d,  $J$  = 8.0 Hz, 1H), 7.62 (dd,  $J$  = 6.4, 1.2 Hz, 1H), 7.41 – 7.30 (m, 2H), 7.27 (dd,  $J$  = 8.0, 1.2 Hz, 2H), 7.20 – 7.06 (m, 4H), 6.96 (d,  $J$  = 1.8 Hz, 1H), 6.82 (dd,  $J$  = 8.0, 1.6 Hz, 1H), 6.67 (s, 1H), 2.13 (s, 3H).  $^{13}\text{C}$  NMR (100 MHz,  $\text{CDCl}_3$ )  $\delta$  168.40, 140.67, 137.97, 137.05, 136.94, 133.12, 132.98, 132.61, 131.65, 129.56, 128.94, 127.74, 127.70, 125.14, 124.08, 120.67, 117.96, 115.46, 111.57, 20.56.

HRMS (ESI) Calc. for  $\text{C}_{22}\text{H}_{16}\text{BrNO}$  [ $\text{M}+\text{H}$ ]: 390.0488; found: 390.0486.

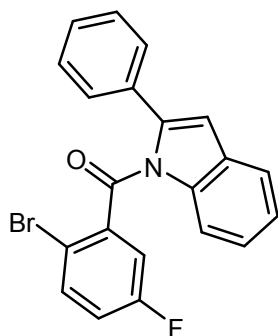

#### (3-bromo-5-fluorophenyl)(2-phenyl-1H-indol-1-yl)methanone (1d)

white solid, MP = 105-106 °C.  $^1\text{H}$  NMR (400 MHz,  $\text{CDCl}_3$ )  $\delta$  8.28 (d,  $J$  = 8.0 Hz, 1H), 7.66 – 7.59 (m, 1H), 7.44 – 7.39 (m, 1H), 7.37 (td,  $J$  = 7.2, 1.2 Hz, 1H), 7.29– 7.26 (m, 2H), 7.25 – 7.10 (m, 4H), 6.89 (dd,  $J$  = 8.0, 3.2 Hz, 1H), 6.76– 6.71 (m, 1H), 6.68 (s, 1H).  $^{13}\text{C}$  NMR (100 MHz,  $\text{CDCl}_3$ )  $\delta$  166.98 (d,  $J$  = 1.9 Hz), 160.97 (d,  $J$  = 247.9 Hz), 140.22, 138.87 (d,  $J$  = 7.0 Hz), 137.88, 134.64 (d,  $J$  = 7.9 Hz), 132.75, 129.59, 129.04, 128.10, 127.93, 125.43, 124.44, 120.78, 118.96 (d,  $J$  = 22.4 Hz), 118.12 (d,  $J$  = 24.4 Hz), 115.64, 115.60, 112.15.

HRMS (ESI) Calc. for  $\text{C}_{21}\text{H}_{13}\text{BrFNO}$  [ $\text{M}+\text{H}$ ]: 395.0237; found: 394.0233.

### III. General Procedures of Pd-Catalyzed Imidoylative Dearomatization

#### of Indoles

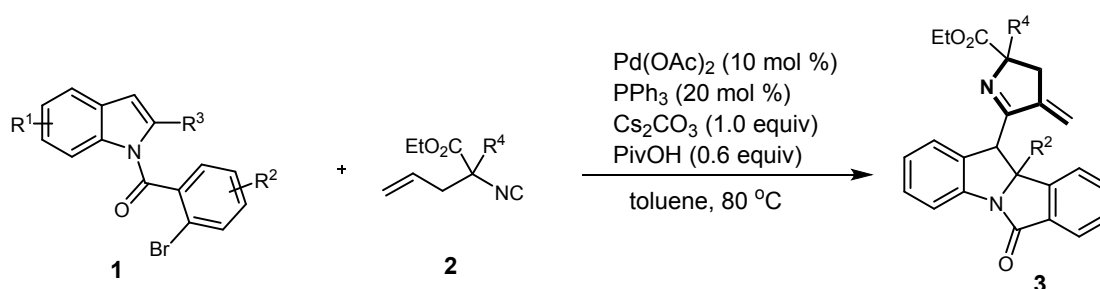

**Procedure A:** An oven-dried 25 mL schlenk tube charged with  $\text{Pd}(\text{OAc})_2$  (0.02 mmol, 4.48 mg, 10 mol%),  $\text{PPh}_3$  (0.04 mmol, 21.6 mg, 20 mol%) and  $\text{Cs}_2\text{CO}_3$  (0.2 mmol, 65.2 mg, 1.0 equiv) was refilled with Ar for 3 times. Then a solution of 1 (0.2 mmol, 1.5 equiv), PivOH (0.12 mmol, 12.2 mg, 0.6 equiv) in 1 mL of dioxane was added by syringe and the tube was placed in an 80 °C oil-bath. A solution of 2 (0.4 mmol, 2 equiv) in 1.0 mL of dioxane was added dropwise with a syringe pump to

the reaction mixture. The addition was finished within 3 h. The crude reaction mixture was extracted with DCM (20 mL × 3) and washed with brine (20 mL). The organic phase was concentrated in vacuo and the residue was purified by silica gel flash column chromatography to afford the corresponding products.

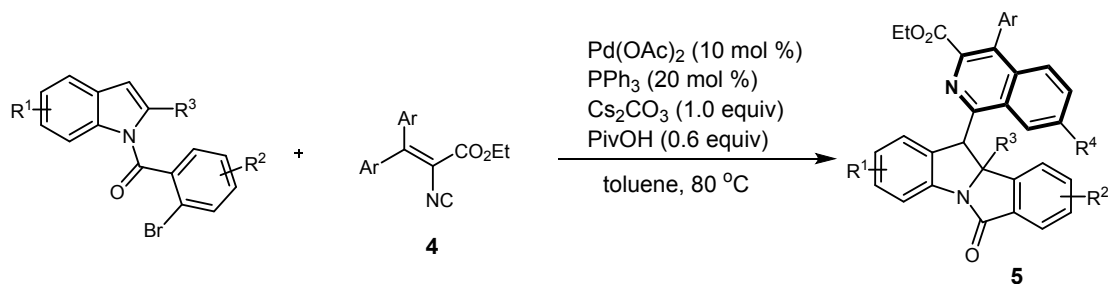

**Procedure B:** An oven-dried 25 mL schlenk tube charged with  $\text{Pd(OAc)}_2$  (0.02 mmol, 4.48 mg, 10 mol%),  $\text{PPh}_3$  (0.04 mmol, 21.6 mg, 20 mol%) and  $\text{Cs}_2\text{CO}_3$  (0.2 mmol, 65.2 mg, 1.0 equiv) was refilled with Ar for 3 times. Then a solution of 1 (0.2 mmol, 1.5 equiv),  $\text{PivOH}$  (0.12 mmol, 12.2 mg, 0.6 equiv) in 1 mL of dioxane was added by syringe and the tube was placed in an 80 °C oil-bath. A solution of 4 (0.4 mmol, 2 equiv) in 1.0 mL of dioxane was added dropwise with a syringe pump to the reaction mixture. The addition was finished within 3 h. The crude reaction mixture was extracted with DCM (20 mL × 3) and washed with brine (20 mL). The organic phase was concentrated in vacuo and the residue was purified by silica gel flash column chromatography to afford the corresponding products.

#### IV. Proposed mechanism of the formation of 5a.

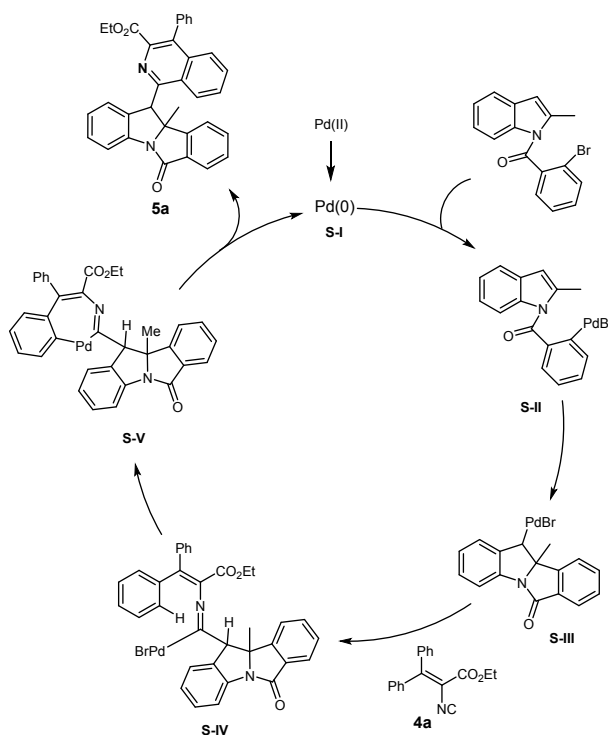

Aryl-Pd<sup>II</sup> intermediate **II** was generated *via* oxidative addition of Pd(0) to C(sp<sup>2</sup>)-Br bond, followed by an intramolecular dearomative double bond insertion reaction, forming benzylic Pd(II) species **III**. Then the imido palladium intermediate **IV** was generated by coordination and insertion of isocyanide. Under the action of acid, **IV** removes a HBr to form a seven-membered ring intermediate **V**, followed by reductive elimination reaction to yield the desired product **5a**. Pd(0) was regenerated to complete the catalytic cycle.

## V. Characterization Data

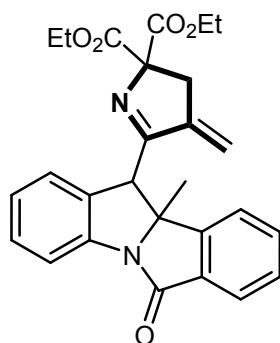

**diethyl 5-(10b-methyl-6-oxo-10b,11-dihydro-6H-isoindolo[2,1-a]indol-11-yl)-4-methylene-3,4-dihydro-2H-pyrrole-2,2-dicarboxylate (3a)**

59.6 mg, 65% yield, pale yellow solid, MP = 154-155 °C. <sup>1</sup>H NMR (400 MHz, CDCl<sub>3</sub>) δ 7.75 (d, *J* = 7.6 Hz, 2H), 7.45 – 7.38 (m, 3H), 7.32 (d, *J* = 7.2 Hz, 1H), 7.27 (d, *J* = 7.2 Hz, 1H), 7.12 (t, *J* = 7.6 Hz, 1H), 4.73 (d, *J* = 11.2 Hz, 2H), 4.28 (q, *J* = 7.2 Hz, 2H), 4.22 – 4.10 (m, 3H), 2.77 (d, *J* = 17.2 Hz, 1H), 2.42 (dt, *J* = 16.8, 2.8 Hz, 1H), 1.76 (s, 3H), 1.31 (t, *J* = 7.2 Hz, 3H), 1.24 (t, *J* = 7.2 Hz, 3H). <sup>13</sup>C NMR (100 MHz, CDCl<sub>3</sub>) δ 175.02, 168.84, 168.60, 168.42, 148.15, 145.28, 140.41, 134.14, 132.92, 132.47, 129.63, 128.82, 126.61, 125.17, 124.68, 123.68, 117.37, 113.62, 81.51, 74.27, 62.36, 62.21, 53.87, 37.75, 29.55, 14.16, 14.05.

HRMS (ESI) Calc. for C<sub>27</sub>H<sub>26</sub>N<sub>2</sub>O<sub>5</sub> [M+H]: 459.1914; found: 459.1910.

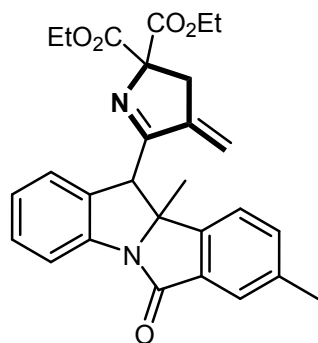

**diethyl 5-(8,10b-dimethyl-6-oxo-10b,11-dihydro-6H-isoindolo[2,1-a]indol-11-yl)-4-methylene-3,4-dihydro-2H-pyrrole-2,2-dicarboxylate (3b)**

51.9 mg, 55% yield, pale yellow solid, MP = 101-102 °C. <sup>1</sup>H NMR (400 MHz, CDCl<sub>3</sub>) δ 7.75 (d, *J* = 8 Hz, 1H), 7.55 (s, 1H), 7.40 (t, *J* = 7.6 Hz, 1H), 7.27 – 7.25 (m, 2H), 7.19 (d, *J* = 8.0 Hz, 1H), 7.12 (td, *J* = 7.6, 0.8 Hz, 1H), 4.76 (s, 1H), 4.70 (s, 1H), 4.33 – 4.27 (m, 2H), 4.25 – 4.10 (m, 3H), 2.78 (dt, *J* = 12.8, 2.0 Hz,

1H), 2.46 (dt,  $J = 12.8, 2.8$  Hz, 1H), 2.40 (s, 3H), 1.74 (s, 3H), 1.32 (t,  $J = 7.2$  Hz, 3H), 1.25 (t,  $J = 7.2$  Hz, 3H).  $^{13}\text{C}$  NMR (100 MHz,  $\text{CDCl}_3$ )  $\delta$  175.16, 169.05, 168.70, 168.52, 145.55, 145.28, 140.51, 138.95, 134.21, 133.50, 133.07, 129.62, 126.63, 125.12, 124.92, 123.36, 117.35, 113.68, 81.56, 74.13, 62.38, 62.24, 53.90, 37.85, 29.76, 21.46, 14.20, 14.09.

HRMS (ESI) Calc. for  $\text{C}_{28}\text{H}_{28}\text{N}_2\text{O}_5$  [M+H]: 473.2071; found: 473.2072.

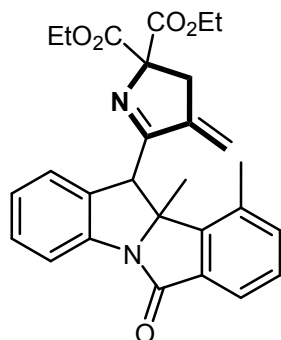

**diethyl 5-(10,10b-dimethyl-6-oxo-10b,11-dihydro-6H-isoindolo[2,1-a]indol-11-yl)-4-methylene-3,4-dihydro-2H-pyrrole-2,2-dicarboxylate (3c)**

72.7 mg, 77% yield, yellow solid, MP = 112-113 °C.  $^1\text{H}$  NMR (400 MHz,  $\text{CDCl}_3$ )  $\delta$  7.75 (d,  $J = 8$  Hz, 1H), 7.63 (d,  $J = 7.6$  Hz, 1H), 7.40 (t,  $J = 7.6$  Hz, 1H), 7.33 (t,  $J = 7.6$  Hz, 1H), 7.27 – 7.25 (m, 1H), 7.14 – 7.10 (m, 1H), 4.78 (s, 1H), 4.77 (s, 1H), 4.29 – 4.20 (m, 1H), 4.18 – 4.12 (m, 2H), 2.65 (d,  $J = 16.8$  Hz, 1H), 2.54 (dt,  $J = 16.8, 2.8$  Hz, 1H), 2.36 (s, 3H), 1.78 (s, 3H), 1.28 (t,  $J = 7.2$  Hz, 3H), 1.22 (t,  $J = 7.2$  Hz, 3H).  $^{13}\text{C}$  NMR (100 MHz,  $\text{CDCl}_3$ )  $\delta$  174.95, 168.56, 168.45, 168.29, 145.60, 144.60, 139.69, 134.96, 134.74, 133.69, 133.20, 129.64, 129.27, 126.52, 125.18, 122.44, 117.39, 113.42, 81.21, 74.58, 62.30, 54.00, 38.26, 27.08, 19.11, 14.13, 14.06.

HRMS (ESI) Calc. for  $\text{C}_{28}\text{H}_{28}\text{N}_2\text{O}_5$  [M+H]: 473.2071; found: 473.2067.

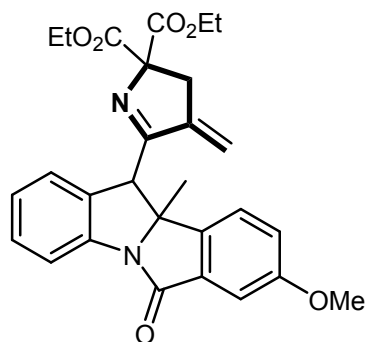

**diethyl 5-(8-methoxy-10b-methyl-6-oxo-10b,11-dihydro-6H-isoindolo[2,1-a]indol-11-yl)-4-methylene-3,4-dihydro-2H-pyrrole-2,2-dicarboxylate (3d)**

74.2 mg, 76% yield, white solid, MP = 118-119 °C.  $^1\text{H}$  NMR (400 MHz,  $\text{CDCl}_3$ )  $\delta$  7.75 (d,  $J = 7.6$  Hz, 1H), 7.41 (t,  $J = 7.6$  Hz, 1H), 7.28 – 7.23 (m, 3H), 7.14 (td,  $J = 7.6, 0.8$  Hz, 1H), 7.01 (dd,  $J = 8.8, 2.4$  Hz, 1H), 4.78 (s, 1H), 4.71 (s, 1H), 4.32 – 4.15 (m, 4H), 4.10 (s, 1H), 3.84 (s, 3H), 2.83 (dt,  $J = 17.2, 1.6$  Hz, 1H), 2.47 (dt,  $J = 17.2, 2.8$  Hz, 1H), 1.75 (s, 3H), 1.32 (t,  $J = 7.2$  Hz, 3H), 1.27 (t,  $J = 7.2$  Hz, 3H).  $^{13}\text{C}$  NMR (100 MHz,  $\text{CDCl}_3$ )  $\delta$  175.11, 168.78, 168.62, 168.42, 160.40, 145.31, 140.50, 140.39, 134.31, 134.25, 129.57, 126.64, 125.13, 124.53, 120.58, 117.29, 113.58, 107.30, 81.50, 73.95, 62.33, 62.16, 55.72, 53.91, 37.84, 29.65, 14.15, 14.05.

HRMS (ESI) Calc. for  $C_{28}H_{28}N_2O_6$  [M+H]: 489.2020; found: 489.2012.

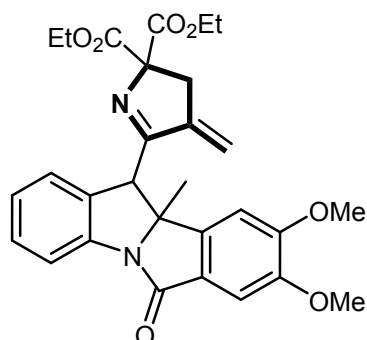

**diethyl 5-(8,9-dimethoxy-10b-methyl-6-oxo-10b,11-dihydro-6H-isoindolo[2,1-a]indol-11-yl)-4-methylene-3,4-dihydro-2H-pyrrole-2,2-dicarboxylate (3e)**

74.6 mg, 72% yield, white solid, MP = 92-93 °C.  $^1H$  NMR (400 MHz,  $CDCl_3$ )  $\delta$  7.72 (d,  $J$  = 7.6 Hz, 1H), 7.39 (t,  $J$  = 7.2 Hz, 1H), 7.24 (d,  $J$  = 7.6 Hz, 1H), 7.19 (s, 1H), 7.10 (td,  $J$  = 7.6, 0.8 Hz, 1H), 6.86 (s, 1H), 4.75 (s, 1H), 4.71 (s, 1H), 4.24 – 4.15 (m, 4H), 4.04 (s, 1H), 3.98 (s, 3H), 3.90 (s, 3H), 2.92 (dt,  $J$  = 16.8, 1.6 Hz, 1H), 2.40 (dt,  $J$  = 16.8, 2.8 Hz, 1H), 1.74 (s, 3H), 1.26 (t,  $J$  = 6.8 Hz, 3H), 1.25 (t,  $J$  = 7.2 Hz, 3H).  $^{13}C$  NMR (101 MHz,  $CDCl_3$ )  $\delta$  175.26, 169.33, 168.84, 168.27, 153.63, 150.06, 144.82, 142.62, 140.62, 134.04, 129.63, 126.59, 124.93, 124.69, 117.12, 114.14, 105.80, 105.69, 81.25, 73.74, 62.44, 62.10, 58.56, 56.43, 56.26, 54.30, 38.07, 30.09, 14.11.

HRMS (ESI) Calc. for  $C_{29}H_{30}N_2O_7$  [M+H]: 519.2126; found: 519.2122.

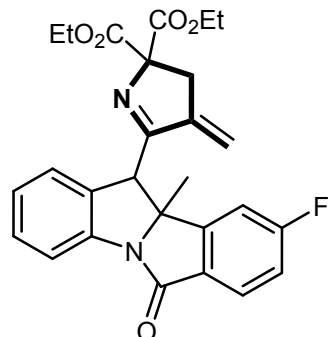

**Diethyl 5-(9-fluoro-10b-methyl-6-oxo-10b,11-dihydro-6H-isoindolo[2,1-a]indol-11-yl)-4-methylene-3,4-dihydro-2H-pyrrole-2,2-dicarboxylate (3f)**

52.4 mg, 55% yield, pale yellow solid, MP = 199-200 °C.  $^1H$  NMR (400 MHz,  $CDCl_3$ )  $\delta$  7.74 (dd,  $J$  = 8.4, 5.2 Hz, 2H), 7.42 (t,  $J$  = 7.6 Hz, 1H), 7.27 (d,  $J$  = 7.6 Hz, 1H), 7.14 – 7.09 (m, 2H), 7.02 (dd,  $J$  = 8, 2 Hz, 1H), 4.75 (d,  $J$  = 22.4 Hz, 2H), 4.36 – 4.26 (m, 2H), 4.26 – 4.16 (m, 2H), 4.10 (s, 1H), 2.84 (dt,  $J$  = 17.2, 2.0 Hz, 1H), 2.55 (dt,  $J$  = 17.2, 2.1 Hz, 1H), 1.77 (s, 3H), 1.32 (t,  $J$  = 6.8 Hz, 3H), 1.26 (t,  $J$  = 7.2 Hz, 3H).  $^{13}C$  NMR (101 MHz,  $CDCl_3$ )  $\delta$  174.66, 168.51, 167.77, 165.57 (d,  $J$  = 252.6 Hz), 150.79 (d,  $J$  = 9.7 Hz), 145.32, 140.34, 133.79, 129.79, 128.95, 126.89 (d,  $J$  = 10.0 Hz), 126.70, 125.35, 117.36, 116.71 (d,  $J$  = 23.4 Hz), 113.91, 111.31 (d,  $J$  = 24.1 Hz), 81.72, 73.83, 62.50, 62.46, 53.89, 37.76, 29.52, 14.14, 14.10.

HRMS (ESI) Calc. for  $C_{27}H_{25}FN_2O_5$  [M+H]: 477.1820; found: 477.1818.



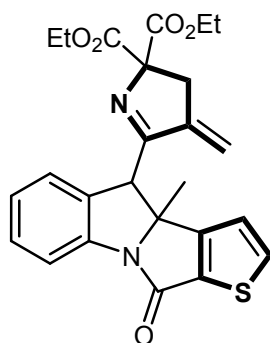

**diethyl 5-(3b-methyl-10-oxo-3b,10-dihydro-4H-thieno[3',2':3,4]pyrrolo[1,2-a]indol-4-yl)-4-methylene-3,4-dihydro-2H-pyrrole-2,2-dicarboxylate (3g)**

37.1 mg, 40% yield, yellow solid, MP = 139-140 °C. <sup>1</sup>H NMR (400 MHz, CDCl<sub>3</sub>) δ 7.69 (d, *J* = 8.0 Hz, 1H), 7.62 (d, *J* = 4.8 Hz, 1H), 7.41 (t, *J* = 7.6 Hz, 1H), 7.28 (s, 1H), 7.14 (td, *J* = 7.6, 1.2 Hz, 1H), 6.92 (d, *J* = 4.8 Hz, 1H), 4.93 (s, 1H), 4.67 (s, 1H), 4.28 – 4.17 (m, 5H), 2.91 (dt, *J* = 17.2, 2.0 Hz, 1H), 2.62 (dt, *J* = 17.2, 2.8 Hz, 1H), 1.79 (s, 3H), 1.32 (t, *J* = 7.2 Hz, 3H), 1.28 (t, *J* = 7.2 Hz, 4H). <sup>13</sup>C NMR (100 MHz, CDCl<sub>3</sub>) δ 175.08, 168.75, 168.49, 164.96, 159.31, 145.50, 140.95, 137.05, 135.77, 133.87, 129.68, 126.68, 125.04, 121.74, 117.17, 113.78, 81.66, 73.58, 62.48, 62.27, 53.44, 37.85, 28.52, 14.20, 14.12.

HRMS (ESI) Calc. for C<sub>25</sub>H<sub>24</sub>N<sub>2</sub>O<sub>5</sub>S [M+H]: 465.1473; found: 465.1470.

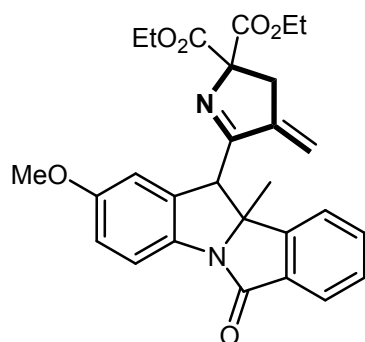

**diethyl 5-(2-methoxy-10b-methyl-6-oxo-10b,11-dihydro-6H-isoindolo[2,1-a]indol-11-yl)-4-methylene-3,4-dihydro-2H-pyrrole-2,2-dicarboxylate (3h)**

75.2 mg, 77% yield, white solid, MP = 113-114 °C. <sup>1</sup>H NMR (400 MHz, CDCl<sub>3</sub>) δ 7.70 (d, *J* = 7.2 Hz, 1H), 7.63 (d, *J* = 8.4 Hz, 1H), 7.43 – 7.35 (m, 2H), 7.27 (d, *J* = 7.6 Hz, 1H), 6.89 (dd, *J* = 8.4, 2.4 Hz, 1H), 6.80 (d, *J* = 2.4 Hz, 1H), 4.74 (s, 1H), 4.64 (s, 1H), 7.28 – 7.10 (m, 5H), 3.74 (s, 3H), 2.74 (d, *J* = 17.2 Hz, 1H), 2.39 (dt, *J* = 17.2, 2.4 Hz, 1H), 1.72 (s, 3H), 1.28 (t, *J* = 7.2 Hz, 3H), 1.21 (t, *J* = 7.2 Hz, 3H). <sup>13</sup>C NMR (100 MHz, CDCl<sub>3</sub>) δ 174.85, 168.72, 168.46, 168.32, 157.50, 147.89, 145.05, 135.54, 133.90, 133.02, 132.19, 128.71, 124.45, 123.56, 117.82, 114.22, 113.70, 112.78, 81.43, 74.57, 62.26, 62.12, 55.71, 54.10, 37.63, 29.31, 14.07, 13.97.

HRMS (ESI) Calc. for C<sub>28</sub>H<sub>28</sub>N<sub>2</sub>O<sub>6</sub> [M+H] 489.2020; found: 489.2019.

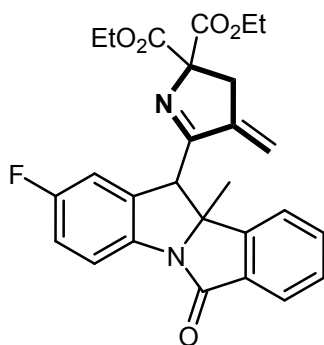

**diethyl 5-(2-fluoro-10b-methyl-6-oxo-10b,11-dihydro-6H-isoindolo[2,1-a]indol-11-yl)-4-methylene-3,4-dihydro-2H-pyrrole-2,2-dicarboxylate (3i)**

71.4 mg, 75% yield, pale yellow solid, MP = 164-165 °C. <sup>1</sup>H NMR (400 MHz, CDCl<sub>3</sub>) δ 7.73 (d, *J* = 7.6 Hz, 1H), 7.68 (dd, *J* = 8.8, 4.8 Hz, 1H), 7.47 – 7.38 (m, 2H), 7.29 (d, *J* = 7.8 Hz, 1H), 7.09 (td, *J* = 8.8, 2.4 Hz, 1H), 6.97 (dd, *J* = 8.0, 2.4 Hz, 1H), 4.83 (s, 1H), 4.66 (s, 1H), 4.27 – 4.09 (m, 5H), 2.79 (d, *J* = 17.2 Hz, 1H), 2.45 (dt, *J* = 17.2, 2.4 Hz, 1H), 1.76 (s, 3H), 1.28 (t, *J* = 7.2 Hz, 3H), 1.23 (t, *J* = 7.2 Hz, 3H). <sup>13</sup>C NMR (101 MHz, CDCl<sub>3</sub>) δ 174.49, 168.88, 168.51, 168.25, 160.39 (d, *J* = 243.3 Hz), 147.87, 145.53, 136.62 (d, *J* = 2.0 Hz), 136.12 (d, *J* = 8.5 Hz), 132.73, 132.56, 128.95, 124.71, 123.58, 118.19 (d, *J* = 8.2 Hz), 116.23 (d, *J* = 23.5 Hz), 113.96 (d, *J* = 24.1 Hz), 113.36, 81.67, 74.81, 62.41, 62.24, 53.54, 37.60, 29.35, 14.11, 14.03.

HRMS (ESI) Calc. for C<sub>27</sub>H<sub>25</sub>FN<sub>2</sub>O<sub>5</sub> [M+H]: 477.1820; found: 477.1825.

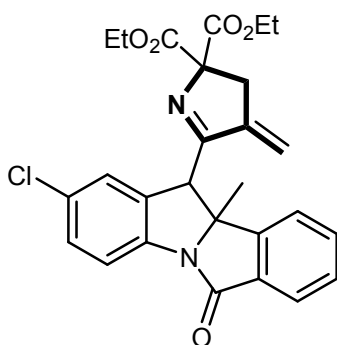

**diethyl 5-(2-chloro-10b-methyl-6-oxo-10b,11-dihydro-6H-isoindolo[2,1-a]indol-11-yl)-4-methylene-3,4-dihydro-2H-pyrrole-2,2-dicarboxylate (3j)**

65.9 mg, 67% yield, pale yellow solid, MP = 148-149 °C. <sup>1</sup>H NMR (400 MHz, CDCl<sub>3</sub>) δ 7.74 (d, *J* = 7.2 Hz, 1H), 7.67 (d, *J* = 8.4 Hz, 1H), 7.48 – 7.35 (m, 3H), 7.30 (d, *J* = 7.2 Hz, 1H), 7.23 (d, *J* = 1.2 Hz, 1H), 4.85 (s, 1H), 4.65 (s, 1H), 4.25 – 4.07 (m, 5H), 2.80 (d, *J* = 17.2 Hz, 1H), 2.47 (d, *J* = 17.2 Hz, 1H), 1.75 (s, 3H), 1.28 (t, *J* = 7.2 Hz, 3H), 1.24 (t, *J* = 7.2 Hz, 3H). <sup>13</sup>C NMR (100 MHz, CDCl<sub>3</sub>) δ 174.46, 168.74, 168.52, 168.23, 147.82, 145.62, 139.06, 136.14, 132.68, 132.63, 130.39, 129.70, 128.99, 126.68, 124.77, 123.60, 118.23, 113.35, 81.73, 74.65, 62.43, 62.26, 53.24, 37.55, 29.42, 14.11, 14.03.

HRMS (ESI) Calc. for C<sub>27</sub>H<sub>25</sub>ClN<sub>2</sub>O<sub>5</sub> [M+H]: 493.1525; found: 493.1524.

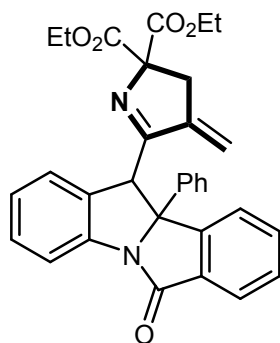

**diethyl 4-methylene-5-(6-oxo-10b-phenyl-10b,11-dihydro-6H-isoindolo[2,1-a]indol-11-yl)-3,4-dihydro-2H-pyrrole-2,2-dicarboxylate (3k)**

84.2 mg, 81% yield, yellow solid, MP = 83-84 °C. <sup>1</sup>H NMR (400 MHz, CDCl<sub>3</sub>) δ 7.90 (d, *J* = 8.0 Hz, 1H), 7.78 (d, *J* = 7.2 Hz, 2H), 7.73 (d, *J* = 7.2 Hz, 1H), 7.45 (d, *J* = 7.2 Hz, 1H), 7.42 – 7.28 (m, 5H), 7.21 (t, *J* = 7.6 Hz, 2H), 7.08 (t, *J* = 7.6 Hz, 1H), 5.36 (s, 1H), 4.88 (s, 1H), 4.36 – 4.29 (m, 3H), 4.23 – 4.14 (m, 2H), 2.84 (d, *J* = 16.8 Hz, 1H), 2.56 – 2.51 (m, 1H), 1.33 (t, *J* = 7.2 Hz, 3H), 1.25 (t, *J* = 7.2 Hz, 3H). <sup>13</sup>C NMR (100 MHz, CDCl<sub>3</sub>) δ 174.97, 169.17, 168.44, 168.20, 147.34, 145.64, 143.70, 140.79, 133.95, 132.49, 132.18, 129.40, 128.81, 128.59, 127.97, 126.03, 125.27, 124.86, 124.47, 124.40, 117.01, 113.24, 81.47, 79.05, 62.16, 62.03, 55.44, 37.81, 14.00, 13.86.

HRMS (ESI) Calc. for C<sub>32</sub>H<sub>28</sub>N<sub>2</sub>O<sub>5</sub> [M+H]: 521.2071; found: 521.2064.

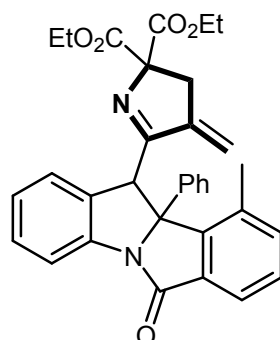

**diethyl 5-(10-methyl-6-oxo-10b-phenyl-10b,11-dihydro-6H-isoindolo[2,1-a]indol-11-yl)-4-methylene-3,4-dihydro-2H-pyrrole-2,2-dicarboxylate (3l)**

87.6 mg, 82% yield, pale yellow solid, MP = 107-108 °C. <sup>1</sup>H NMR (400 MHz, CDCl<sub>3</sub>) δ 7.70 (d, *J* = 7.2 Hz, 1H), 7.67 (d, *J* = 7.6 Hz, 1H), 7.40 – 7.33 (m, 5H), 7.26 – 7.20 (m, 4H), 7.12 (t, *J* = 7.6 Hz, 1H), 5.73 (s, 1H), 4.85 (s, 1H), 4.26 – 4.14 (m, 5H), 2.64 (d, *J* = 16.8 Hz, 1H), 2.48 (dt, *J* = 16.8, 2.8 Hz, 1H), 2.02 (s, 3H), 1.27 (t, *J* = 7.2 Hz, 3H), 1.24 (t, *J* = 6.0 Hz, 3H). <sup>13</sup>C NMR (100 MHz, CDCl<sub>3</sub>) δ 174.68, 169.20, 168.50, 168.33, 145.37, 144.98, 140.14, 139.82, 135.48, 135.25, 134.38, 134.01, 129.77, 129.72, 128.68, 128.47, 126.27, 125.78, 125.43, 122.36, 117.79, 113.56, 80.93, 79.21, 62.33, 62.31, 51.04, 38.50, 19.30, 14.12, 14.07.

HRMS (ESI) Calc. for C<sub>33</sub>H<sub>30</sub>N<sub>2</sub>O<sub>5</sub> [M+H]: 535.2227; found: 535.2222.

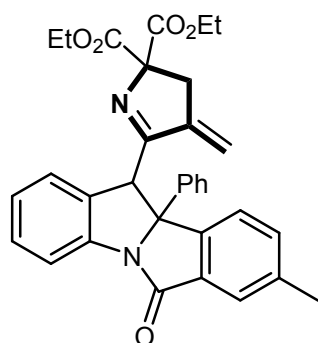

**diethyl 5-(8-methyl-6-oxo-10b-phenyl-10b,11-dihydro-6H-isoindolo[2,1-a]indol-11-yl)-4-methylene-3,4-dihydro-2H-pyrrole-2,2-dicarboxylate (3m)**

91.9 mg, 86% yield, yellow solid, MP = 119-120 °C. <sup>1</sup>H NMR (400 MHz, CDCl<sub>3</sub>) δ 7.88 (d, *J* = 7.6 Hz, 1H), 7.78 – 7.71 (m, 2H), 7.52 (s, 1H), 7.40 (t, *J* = 7.2 Hz, 1H), 7.32 – 7.29 (m, 3H), 7.24 – 7.16 (m, 3H), 7.09 (td, *J* = 7.6, 0.8 Hz, 1H), 5.32 (s, 1H), 4.86 (s, 1H), 4.41 – 4.09 (m, 5H), 2.82 (d, *J* = 17.2 Hz, 1H), 2.54 (dt, *J* = 17.2, 2.8 Hz, 1H), 2.35 (s, 3H), 1.35 (t, *J* = 7.2 Hz, 3H), 1.27 (t, *J* = 7.2 Hz, 3H). <sup>13</sup>C NMR (100 MHz, CDCl<sub>3</sub>) δ 175.33, 169.64, 168.76, 168.53, 145.75, 144.99, 144.26, 141.09, 138.97, 134.15, 133.72, 132.50, 129.61, 129.00, 128.07, 126.28, 125.43, 125.04, 124.93, 124.25, 117.20, 113.60, 81.68, 79.07, 62.40, 62.29, 55.77, 38.13, 21.34, 14.24, 14.09.

HRMS (ESI) Calc. for C<sub>33</sub>H<sub>30</sub>N<sub>2</sub>O<sub>5</sub> [M+H]: 535.2227; found: 535.2226.

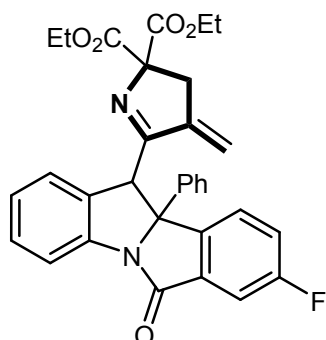

**diethyl 5-(8-fluoro-6-oxo-10b-phenyl-10b,11-dihydro-6H-isoindolo[2,1-a]indol-11-yl)-4-methylene-3,4-dihydro-2H-pyrrole-2,2-dicarboxylate (3n)**

62.4 mg, 58% yield, white solid, MP = 115-116 °C. <sup>1</sup>H NMR (400 MHz, CDCl<sub>3</sub>) δ 7.89 (d, *J* = 8.0 Hz, 1H), 7.75 (d, *J* = 7.6 Hz, 2H), 7.45 – 7.39 (m, 3H), 7.34 (t, *J* = 7.2 Hz, 2H), 7.28 – 7.20 (m, 2H), 7.15 – 7.09 (m, 2H), 5.33 (s, 1H), 4.94 (s, 1H), 4.39 (s, 1H), 4.31 (q, *J* = 7.2 Hz, 2H), 4.25 – 4.14 (m, 2H), 2.92 (d, *J* = 16.8 Hz, 1H), 2.56 (d, *J* = 16.8 Hz, 1H), 1.33 (t, *J* = 7.2 Hz, 3H), 1.30 – 1.26 (m, 3H). <sup>13</sup>C NMR (100 MHz, CDCl<sub>3</sub>) δ 175.13, 168.71, 168.36, 168.14, 163.05 (d, *J* = 248.5 Hz), 145.94, 143.57, 143.13, 140.70, 134.64 (d, *J* = 8.2 Hz), 134.12, 129.72, 129.14, 128.32, 126.33, 126.23, 125.74, 125.00, 120.15 (d, *J* = 24.4 Hz), 117.28, 113.60, 111.32 (d, *J* = 24.4 Hz), 81.71, 78.99, 62.46, 62.30, 55.45, 38.00, 14.18, 14.09.

HRMS (ESI) Calc. for C<sub>32</sub>H<sub>27</sub>FN<sub>2</sub>O<sub>5</sub> [M+H]: 539.1977; found: 539.1972.

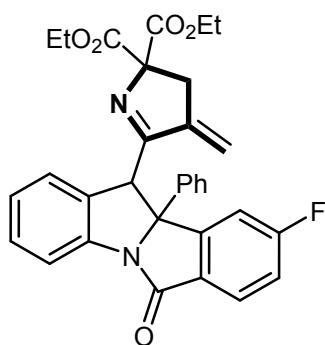

**diethyl 5-(9-fluoro-6-oxo-10b-phenyl-10b,11-dihydro-6H-isoindolo[2,1-a]indol-11-yl)-4-methylene-3,4-dihydro-2H-pyrrole-2,2-dicarboxylate (3o)**

75.3 mg, 70% yield, pale yellow solid, MP = 145-146 °C. <sup>1</sup>H NMR (400 MHz, CDCl<sub>3</sub>) δ 7.86 (d, *J* = 7.6 Hz, 1H), 7.76 – 7.70 (m, 3H), 7.41 (t, *J* = 7.6 Hz, 1H), 7.34 (t, *J* = 7.2 Hz, 2H), 7.26 (t, *J* = 7.2 Hz, 1H), 7.20 (d, *J* = 7.6 Hz, 1H), 7.10 – 7.02 (m, 3H), 5.34 (s, 1H), 4.89 (s, 1H), 4.38 – 4.29 (m, 3H), 4.26 – 4.17 (m, 2H), 2.88 (dt, *J* = 17.2, 2 Hz, 1H), 2.62 (dt, *J* = 17.2, 2.4 Hz, 1H), 1.34 (t, *J* = 7.2 Hz, 3H), 1.27 (t, *J* = 7.2 Hz, 3H). <sup>13</sup>C NMR (100 MHz, CDCl<sub>3</sub>) δ 174.83, 168.56, 168.49, 168.36, 165.54 (d, *J* = 252.6 Hz), 150.18 (d, *J* = 9.8 Hz), 145.74, 143.33, 140.85, 133.75, 129.74, 129.18, 128.44, 128.30 (d, *J* = 2.0 Hz), 126.83 (d, *J* = 9.9 Hz), 126.32, 125.62, 125.06, 117.20, 116.66 (d, *J* = 23.4 Hz), 113.79, 112.25 (d, *J* = 24.6 Hz), 81.79, 78.72, 62.48, 62.45, 55.75, 38.03, 14.15, 14.08.

HRMS (ESI) Calc. for C<sub>32</sub>H<sub>27</sub>FN<sub>2</sub>O<sub>5</sub> [M+H]: 539.1977; found: 539.1973.

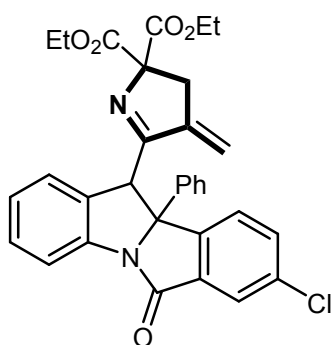

**diethyl 5-(8-chloro-6-oxo-10b-phenyl-10b,11-dihydro-6H-isoindolo[2,1-a]indol-11-yl)-4-methylene-3,4-dihydro-2H-pyrrole-2,2-dicarboxylate (3p)**

62.1 mg, 56% yield, pale yellow solid, MP = 133-134 °C. <sup>1</sup>H NMR (400 MHz, CDCl<sub>3</sub>) δ 7.89 (d, *J* = 7.6 Hz, 1H), 7.75 – 7.71 (m, 3H), 7.44 – 7.32 (m, 5H), 7.29 – 7.20 (m, 2H), 7.13 (t, *J* = 7.6 Hz, 1H), 5.32 (s, 1H), 4.97 (s, 1H), 4.43 (s, 1H), 4.33 – 4.12 (m, 4H), 2.94 (d, *J* = 16.8 Hz, 1H), 2.58 (dt, *J* = 16.8, 2.4 Hz, 1H), 1.32 (t, *J* = 7.2 Hz, 3H), 1.29 – 1.26 (m, 3H). <sup>13</sup>C NMR (100 MHz, CDCl<sub>3</sub>) δ 175.06, 168.71, 168.35, 167.92, 146.02, 145.79, 143.39, 140.62, 135.16, 134.23, 134.09, 132.78, 129.72, 129.17, 128.39, 126.28, 125.79, 125.75, 124.98, 124.71, 117.27, 113.57, 81.78, 79.06, 62.48, 62.30, 55.24, 37.96, 29.82, 14.18, 14.09.

HRMS (ESI) Calc. for C<sub>32</sub>H<sub>27</sub>ClN<sub>2</sub>O<sub>5</sub> [M+H]: 555.1681; found: 555.1674.

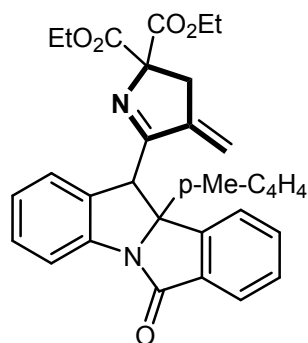

**diethyl 4-methylene-5-(6-oxo-10b-(p-tolyl)-10b,11-dihydro-6H-isoindolo[2,1-a]indol-11-yl)-3,4-dihydro-2H-pyrrole-2,2-dicarboxylate (3q)**

86.5 mg, 81% yield, yellow solid, MP = 103-104 °C. <sup>1</sup>H NMR (400 MHz, CDCl<sub>3</sub>) δ 7.87 (d, *J* = 7.8 Hz, 1H), 7.73 – 7.71 (m, 1H), 7.65 (d, *J* = 8.4 Hz, 2H), 7.41 – 7.32 (m, 4H), 7.19 (d, *J* = 7.6 Hz, 1H), 7.13 – 7.07 (m, 3H), 5.33 (s, 1H), 4.85 (s, 1H), 4.34 – 4.29 (m, 3H), 4.26 – 4.10 (m, 2H), 2.80 (dt, *J* = 16.8, 1.6 Hz, 1H), 2.49 (dt, *J* = 16.8, 2.4 Hz, 1H), 2.26 (s, 3H), 1.34 (t, *J* = 7.2 Hz, 3H), 1.26 (t, *J* = 6.8 Hz, 3H). <sup>13</sup>C NMR (100 MHz, CDCl<sub>3</sub>) δ 175.23, 169.38, 168.64, 168.43, 147.73, 145.71, 140.95, 140.87, 137.99, 134.17, 132.65, 132.34, 129.64, 129.57, 128.66, 126.27, 125.42, 124.99, 124.65, 124.51, 117.21, 113.51, 81.57, 79.16, 62.37, 62.23, 55.69, 38.05, 21.00, 14.18, 14.04.

HRMS (ESI) Calc. for C<sub>33</sub>H<sub>30</sub>N<sub>2</sub>O<sub>5</sub> [M+H]: 535.2227; found: 535.2223.

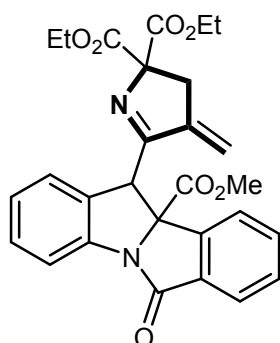

**diethyl 5-(10b-(methoxycarbonyl)-6-oxo-10b,11-dihydro-6H-isoindolo[2,1-a]indol-11-yl)-4-methylene-3,4-dihydro-2H-pyrrole-2,2-dicarboxylate (3r)**

60.3 mg, 60% yield, white solid, MP = 127-128 °C. <sup>1</sup>H NMR (400 MHz, CDCl<sub>3</sub>) δ 7.80 – 7.74 (m, 2H), 7.47 – 7.37 (m, 4H), 7.22 (d, *J* = 7.6 Hz, 1H), 7.11 (td, *J* = 7.6, 1.2 Hz, 1H), 5.42 (s, 1H), 5.06 (s, 1H), 4.80 (s, 1H), 4.15 – 3.98 (m, 4H), 3.70 (s, 3H), 2.83 (dt, *J* = 17.2, 2.0 Hz, 1H), 2.58 (dt, *J* = 17.2, 2.4 Hz, 1H), 1.22 (t, *J* = 7.2 Hz, 3H), 1.18 (t, *J* = 7.2 Hz, 3H). <sup>13</sup>C NMR (100 MHz, CDCl<sub>3</sub>) δ 174.08, 171.27, 168.66, 168.63, 168.15, 146.72, 141.25, 140.70, 133.86, 133.82, 132.66, 129.92, 129.58, 125.85, 125.34, 124.69, 124.48, 117.00, 112.92, 82.07, 79.08, 62.24, 62.16, 53.91, 48.73, 37.34, 14.06, 13.99.

HRMS (ESI) Calc. for C<sub>28</sub>H<sub>26</sub>N<sub>2</sub>O<sub>7</sub> [M+H]: 503.1813; found: 503.1814.

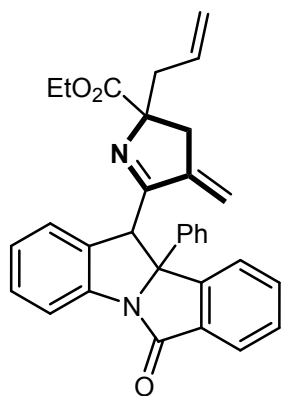

**ethyl 2-allyl-4-methylene-5-(6-oxo-10b-phenyl-10b,11-dihydro-6H-isoindolo[2,1-a]indol-11-yl)-3,4-dihydro-2H-pyrrole-2-carboxylate (3s)**

73.2 mg, 75% yield, white solid, MP = 142-143 °C. <sup>1</sup>H NMR (400 MHz, CDCl<sub>3</sub>) δ 7.88 (d, *J* = 7.6 Hz, 1H), 7.75 (d, *J* = 7.2 Hz, 3H), 7.45 – 7.30 (m, 6H), 7.23 (t, *J* = 7.2 Hz, 1H), 7.14 (t, *J* = 6.8 Hz, 1H), 7.08 (tdd, *J* = 7.2, 2.8, 0.8 Hz, 1H), 5.65 – 5.32 (m, 1H), 5.21 (d, *J* = 4.8 Hz, 1H), 5.09 – 5.03 (m, 1H), 5.03 – 4.87 (m, 2H), 4.57 (s, 1H), 4.23 – 3.97 (m, 2H), 2.73 – 2.02 (m, 4H), 1.24 (dt, *J* = 21.2, 7.2 Hz, 3H). <sup>13</sup>C NMR (100 MHz, CDCl<sub>3</sub>) δ 172.64 (d, *J* = 23.1 Hz), 172.28 (d, *J* = 6.2 Hz), 169.26 (d, *J* = 16.0 Hz), 147.58 (d, *J* = 22.4 Hz), 143.88 (d, *J* = 10.3 Hz), 140.81 (d, *J* = 12.0 Hz), 135.23 (d, *J* = 23.2 Hz), 132.82 (d, *J* = 7.5 Hz), 132.71, 132.41 (d, *J* = 9.1 Hz), 132.28, 129.37 (d, *J* = 3.0 Hz), 129.03 (d, *J* = 2.0 Hz), 128.73, 128.14 (d, *J* = 2.0 Hz), 125.94 (d, *J* = 11.4 Hz), 125.31, 125.10 (d, *J* = 2.2 Hz), 124.76 (d, *J* = 10.5 Hz), 124.42, 119.16 (d, *J* = 14.4 Hz), 117.28 (d, *J* = 8.1 Hz), 111.60, 79.45 (d, *J* = 5.2 Hz), 78.20 (d, *J* = 55.4 Hz), 61.41 (d, *J* = 8.2 Hz), 54.46, 42.71 (d, *J* = 55.1 Hz), 38.77 (d, *J* = 55.1 Hz), 14.30 (d, *J* = 11.0 Hz).

HRMS (ESI) Calc. for C<sub>32</sub>H<sub>28</sub>N<sub>2</sub>O<sub>3</sub> [M+H]: 489.2173; found: 489.2180.

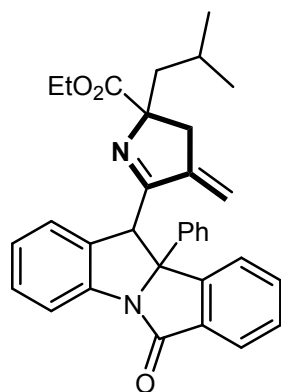

**ethyl 2-isobutyl-4-methylene-5-(6-oxo-10b-phenyl-10b,11-dihydro-6H-isoindolo[2,1-a]indol-11-yl)-3,4-dihydro-2H-pyrrole-2-carboxylate (3t)**

70.6 mg, 70% yield, yellow solid, MP = 137-138 °C. <sup>1</sup>H NMR (400 MHz, CDCl<sub>3</sub>) δ 7.88 (dd, *J* = 7.6, 2.8 Hz, 1H), 7.79 – 7.70 (m, 3H), 7.48 – 7.28 (m, 6H), 7.26 – 7.19 (m, 1H), 7.18 – 7.02 (m, 2H), 5.21 (d, *J* = 5.6 Hz, 1H), 4.88 (d, *J* = 8.4 Hz, 1H), 4.49 (s, 1H), 4.29 – 3.94 (m, 2H), 2.76 – 2.46 (m, 1H), 2.07 (dd, *J* = 80.8, 16.8 Hz, 1H), 1.72 – 1.61 (m, 1H), 1.59 – 1.41 (m, 2H), 1.26 (dt, *J* = 22.4, 7.2 Hz, 3H), 0.94 – 0.79 (m, 6H). <sup>13</sup>C NMR (100 MHz, CDCl<sub>3</sub>) δ 173.46 (d, *J* = 40.4 Hz), 171.39 (d, *J* = 22.8 Hz), 169.29 (d, *J* = 21.7 Hz), 147.65 (d, *J* = 24.3 Hz), 147.41, 143.93 (d, *J* = 10.6 Hz), 140.85 (d, *J* = 16.3 Hz), 135.16 (d, *J* = 22.8 Hz), 132.82 (d, *J* = 12.7 Hz), 132.33 (d, *J* = 11.8 Hz), 129.34 (d, *J* = 1.0 Hz), 129.02 (d, *J* = 1.4 Hz), 128.68 (d, *J* = 1.8 Hz), 128.12 (d, *J* = 1.2 Hz), 125.96 (d, *J* = 13.8 Hz), 125.31, 125.13, 124.75 (d, *J* = 6.9 Hz), 124.47,

117.24 (d,  $J = 6.4$  Hz), 111.17, 79.46 (d,  $J = 11.7$  Hz), 78.61 (d,  $J = 49.6$  Hz), 61.24 (d,  $J = 6.6$  Hz), 54.63 (d,  $J = 5.2$  Hz), 47.79 (d,  $J = 81.8$  Hz), 40.72 (d,  $J = 56.4$  Hz), 25.07 (d,  $J = 34.2$  Hz), 24.09, 23.84 (d,  $J = 5.7$  Hz), 14.26 (d,  $J = 13.5$  Hz).

HRMS (ESI) Calc. for  $C_{33}H_{32}N_2O_3$  [M+H]: 505.2486; found: 505.2490.

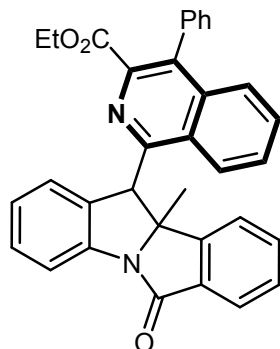

**ethyl 1-(10b-methyl-6-oxo-10b,11-dihydro-6H-isoindolo[2,1-a]indol-11-yl)-4-phenylisoquinoline-3-carboxylate (5a)**

89.8 mg, 88% yield, white solid, MP = 190-191 °C.  $^1H$  NMR (400 MHz, DMSO)  $\delta$  9.01 (d,  $J = 8.0$  Hz, 1H), 7.93 (t,  $J = 7.2$  Hz, 1H), 7.79 (t,  $J = 7.6$  Hz, 1H), 7.62 (dd,  $J = 13.6, 8.0$  Hz, 2H), 7.49 – 7.32 (m, 5H), 7.28 (t,  $J = 6.0$  Hz, 2H), 7.19 – 7.04 (m, 3H), 6.88 (d,  $J = 7.2$  Hz, 2H), 5.78 (s, 1H), 3.74 (dd,  $J = 13.6, 6.4$  Hz, 2H), 1.82 (s, 3H), 0.86 (t,  $J = 7.2$  Hz, 4H).  $^{13}C$  NMR (100 MHz, DMSO)  $\delta$  168.07, 165.64, 159.04, 148.63, 141.30, 140.01, 139.11, 134.94, 134.66, 133.18, 131.69, 131.10, 129.58, 128.88, 128.21, 128.10, 127.90, 127.78, 126.04, 125.85, 125.56, 124.17, 123.51, 121.83, 116.80, 75.44, 60.13, 50.75, 27.88, 13.43.

HRMS (ESI) Calc. for  $C_{32}H_{22}N_2O_3$  [M+H]: 483.1703; found: 483.1705.

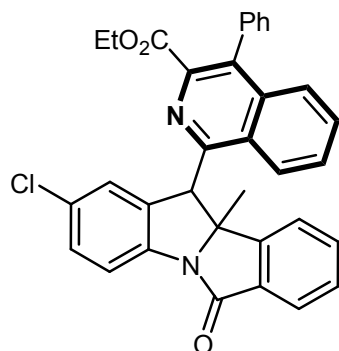

**ethyl 1-(2-chloro-10b-methyl-6-oxo-10b,11-dihydro-6H-isoindolo[2,1-a]indol-11-yl)-4-phenylisoquinoline-3-carboxylate (5b)**

90.3 mg, 83% yield, white solid, MP = 103-104 °C.  $^1H$  NMR (400 MHz, DMSO)  $\delta$  8.98 (d,  $J = 8.4$  Hz, 1H), 7.93 (t,  $J = 7.6$  Hz, 1H), 7.80 (t,  $J = 7.6$  Hz, 1H), 7.61 (dd,  $J = 16.4, 7.6$  Hz, 2H), 7.49 – 7.33 (m, 6H), 7.27 (t,  $J = 7.6$  Hz, 1H), 7.18 – 7.07 (m, 2H), 6.86 (d,  $J = 7.6$  Hz, 2H), 5.80 (s, 1H), 3.76 (q,  $J = 6.8$  Hz, 2H), 1.84 (s, 3H), 0.87 (t,  $J = 7.2$  Hz, 3H).  $^{13}C$  NMR (100 MHz, DMSO)  $\delta$  168.07, 165.55, 158.48, 148.15, 141.32, 141.18, 139.30, 134.89, 134.69, 132.74, 131.80, 131.17, 129.75, 129.52, 128.94, 128.19, 128.07, 127.97, 127.90, 126.12, 126.06, 125.83, 125.60, 123.58, 121.91, 117.91, 75.97, 60.14, 50.80, 27.53, 13.42.

HRMS (ESI) Calc. for  $C_{34}H_{25}ClN_2O_3$  [M+H]: 545.1626; found: 545.1634.



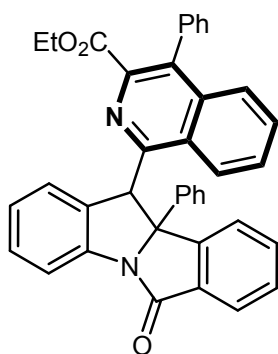

**ethyl 1-(6-oxo-10b-phenyl-10b,11-dihydro-6H-isoindolo[2,1-a]indol-11-yl)-4-phenylisoquinoline-3-carboxylate (5c)**

97.3 mg, 83% yield, yellow solid, MP = 119-120 °C. <sup>1</sup>H NMR (400 MHz, DMSO) δ 9.15 (d, *J* = 7.8 Hz, 1H), 8.00 (d, *J* = 6.4 Hz, 1H), 7.87 (d, *J* = 7.8 Hz, 2H), 7.84 – 7.78 (m, 2H), 7.62 (d, *J* = 7.2 Hz, 1H), 7.49 (d, *J* = 8.4 Hz, 1H), 7.45 – 7.20 (m, 10H), 7.15 (d, *J* = 3.6 Hz, 1H), 7.10 (t, *J* = 7.6 Hz, 1H), 7.03 (t, *J* = 7.2 Hz, 1H), 6.98 – 6.87 (m, 2H), 6.26 (s, 1H), 3.80 (d, *J* = 6.4 Hz, 2H), 0.92 (t, *J* = 7.2 Hz, 3H). <sup>13</sup>C NMR (100 MHz, DMSO) δ 168.68, 166.07, 158.98, 148.09, 144.10, 141.83, 141.01, 139.10, 135.40, 135.31, 133.29, 132.34, 131.68, 130.31, 130.04, 129.75, 129.48, 128.92, 128.71, 128.58, 128.42, 128.36, 128.30, 126.60, 126.53, 126.22, 125.69, 124.92, 124.15, 123.08, 117.23, 81.10, 60.67, 53.04, 13.95.

HRMS (ESI) Calc. for C<sub>39</sub>H<sub>28</sub>N<sub>2</sub>O<sub>3</sub> [M+H]: 573.2173; found: 573.2170.

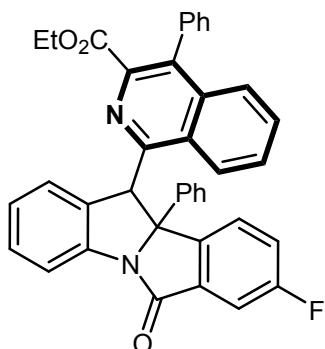

**ethyl 1-(8-fluoro-6-oxo-10b-phenyl-10b,11-dihydro-6H-isoindolo[2,1-a]indol-11-yl)-4-phenylisoquinoline-3-carboxylate (5d)**

85.1 mg, 72% yield, yellow solid, MP = 108-109 °C. <sup>1</sup>H NMR (400 MHz, DMSO) δ 9.13 (d, *J* = 8.4 Hz, 1H), 7.98 (d, *J* = 7.6 Hz, 1H), 7.85 (d, *J* = 7.6 Hz, 3H), 7.78 (d, *J* = 7.6 Hz, 1H), 7.51 (d, *J* = 8.4 Hz, 1H), 7.44 – 7.30 (m, 8H), 7.25 (d, *J* = 7.6 Hz, 1H), 7.16 (t, *J* = 2.7 Hz, 1H), 7.08 – 6.97 (m, 4H), 6.24 (s, 1H), 3.80 (dd, *J* = 6.8, 4.4 Hz, 2H), 0.89 (t, *J* = 7.2 Hz, 3H). <sup>13</sup>C NMR (100 MHz, DMSO) δ 167.04, 164.40 (d, *J* = 256.9 Hz), 160.68, 158.52, 143.81, 143.79, 143.26, 141.43, 140.04, 138.53, 134.81, 131.36, 129.81, 129.60, 129.33, 129.06, 128.57, 128.30, 128.18, 128.04, 127.99, 126.05, 126.02, 125.82, 125.39, 125.19, 124.73, 119.29, 119.05, 116.85, 110.15 (d, *J* = 23.3 Hz), 80.23, 60.27, 52.49, 13.44.

HRMS (ESI) Calc. for C<sub>39</sub>H<sub>27</sub>FN<sub>2</sub>O<sub>3</sub> [M+H]: 591.2078; found: 591.2071.

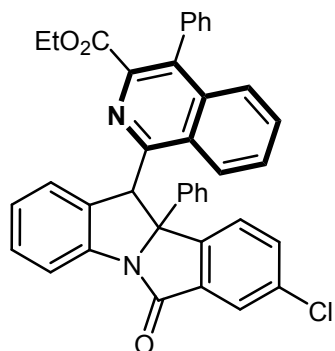

**ethyl 1-(8-chloro-6-oxo-10b-phenyl-10b,11-dihydro-6H-isoindolo[2,1-a]indol-11-yl)-4-phenylisoquinoline-3-carboxylate (5e)**

93.4 mg, 77% yield, yellow solid, MP = 252-253 °C. <sup>1</sup>H NMR (400 MHz, DMSO) δ 9.13 (d, *J* = 7.6 Hz, 1H), 7.98 (d, *J* = 7.2 Hz, 1H), 7.79 – 7.76 (m, 4H), 7.62 (d, *J* = 1.6 Hz, 1H), 7.52 (d, *J* = 8.4 Hz, 1H), 7.44 – 7.17 (m, 10H), 7.07 – 6.98 (m, 3H), 6.25 (s, 1H), 3.86 – 3.77 (m, 2H), 0.91 (t, *J* = 7.2 Hz, 3H). <sup>13</sup>C NMR (100 MHz, DMSO) δ 166.76, 165.63, 158.44, 146.63, 143.00, 141.35, 139.88, 138.34, 134.86, 134.80, 132.78, 131.77, 131.39, 129.93, 129.60, 129.33, 129.08, 128.61, 128.30, 128.16, 128.05, 126.06, 125.99, 125.81, 125.44, 125.20, 124.78, 124.54, 123.37, 116.86, 80.31, 60.29, 52.59, 13.47.

HRMS (ESI) Calc. for C<sub>39</sub>H<sub>27</sub>ClN<sub>2</sub>O<sub>3</sub> [M+H]: 607.1783; found: 607.1776.

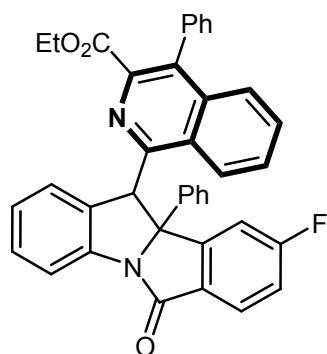

**ethyl 1-(9-fluoro-6-oxo-10b-phenyl-10b,11-dihydro-6H-isoindolo[2,1-a]indol-11-yl)-4-phenylisoquinoline-3-carboxylate (5f)**

95.6 mg, 81% yield, yellow solid, MP = 111-112 °C. <sup>1</sup>H NMR (400 MHz, DMSO) δ 9.14 (d, *J* = 7.2 Hz, 1H), 7.99 (s, 1H), 7.92 (d, *J* = 7.6 Hz, 2H), 7.83 (d, *J* = 7.6 Hz, 2H), 7.72 (dd, *J* = 8.0, 5.2 Hz, 1H), 7.53 (d, *J* = 8.4 Hz, 1H), 7.48 – 7.22 (m, 8H), 7.21 – 7.08 (m, 2H), 7.05 – 6.98 (m, 3H), 6.27 (s, 1H), 3.81 (d, *J* = 6.0 Hz, 2H), 0.92 (t, *J* = 7.2 Hz, 3H). <sup>13</sup>C NMR (100 MHz, DMSO) δ 167.11, 164.48 (d, *J* = 232.2 Hz), 163.32, 158.44, 150.90 (d, *J* = 9.9 Hz), 143.30, 141.31, 139.99, 138.06, 134.95, 134.87, 131.30, 130.02, 129.60, 129.29, 129.07, 128.59, 128.30, 128.15, 128.04, 126.16, 126.07, 125.73, 125.56, 125.30, 124.53, 116.67, 115.32 (d, *J* = 23.4 Hz), 110.29 (d, *J* = 24.7 Hz), 79.94, 60.32, 53.00, 13.47.

HRMS (ESI) Calc. for C<sub>39</sub>H<sub>27</sub>FN<sub>2</sub>O<sub>3</sub> [M+H]: 591.2078; found: 591.2081.

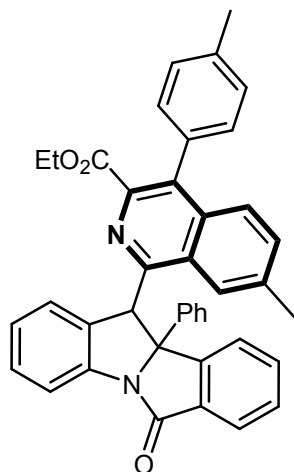

**ethyl 7-methyl-1-(6-oxo-10b-phenyl-10b,11-dihydro-6H-isoindolo[2,1-a]indol-11-yl)-4-(p-tolyl)isoquinoline-3-carboxylate (5g)**

102.1 mg, 85% yield, pale yellow solid, MP = 209-210 °C. <sup>1</sup>H NMR (400 MHz, DMSO) δ 8.91 (s, 1H), 7.86 (d, *J* = 7.6 Hz, 2H), 7.80 (d, *J* = 7.6 Hz, 1H), 7.63 (t, *J* = 7.6 Hz, 2H), 7.42 (t, *J* = 7.6 Hz, 3H), 7.37 – 7.18 (m, 6H), 7.12 (t, *J* = 7.2 Hz, 1H), 7.00 (t, *J* = 11.2 Hz, 3H), 6.82 (d, *J* = 6.0 Hz, 1H), 6.22 (s, 1H), 3.81 (dd, *J* = 12.0, 6.8 Hz, 2H), 2.72 (s, 3H), 2.32 (s, 3H), 0.95 (t, *J* = 7.2 Hz, 3H). <sup>13</sup>C NMR (100 MHz, DMSO) δ 168.12, 165.71, 157.56, 147.90, 143.83, 140.60, 140.30, 139.20, 138.69, 137.11, 133.25, 133.13, 132.97, 132.09, 131.92, 129.81, 129.48, 129.40, 128.97, 128.77, 128.63, 128.38, 127.80, 127.69, 126.27, 125.98, 125.66, 125.21, 124.35, 123.90, 123.60, 122.66, 116.66, 80.46, 60.11, 52.43, 21.60, 20.78, 13.53.

HRMS (ESI) Calc. for C<sub>41</sub>H<sub>32</sub>N<sub>2</sub>O<sub>3</sub> [M+H]: 601.2486; found: 601.2492.

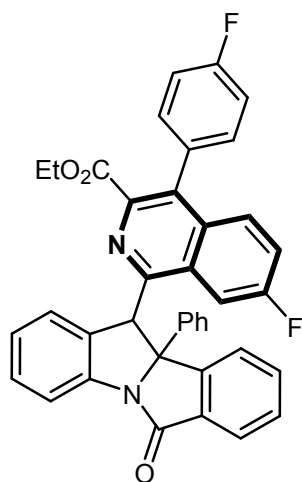

**ethyl 7-fluoro-4-(4-fluorophenyl)-1-(6-oxo-10b-phenyl-10b,11-dihydro-6H-isoindolo[2,1-a]indol-11-yl)isoquinoline-3-carboxylate (5h)**

99.8 mg, 82% yield, yellow solid, MP = 102-103 °C. <sup>1</sup>H NMR (400 MHz, DMSO) δ 9.01 (d, *J* = 9.6 Hz, 1H), 7.85 (d, *J* = 7.6 Hz, 2H), 7.78 (d, *J* = 7.6 Hz, 2H), 7.60 (d, *J* = 7.6 Hz, 1H), 7.53 (dd, *J* = 9.2, 5.6 Hz, 1H), 7.42 (t, *J* = 7.6 Hz, 2H), 7.37 – 7.19 (m, 7H), 7.16 – 7.09 (m, 1H), 7.02 (dd, *J* = 17.6, 7.6 Hz, 2H), 6.93 (s, 1H), 6.21 (s, 1H), 3.82 (d, *J* = 6.8 Hz, 2H), 0.96 (t, *J* = 7.2 Hz, 3H). <sup>13</sup>C NMR (100 MHz, DMSO) δ 168.13, 165.27, 161.85 (d, *J* = 243.4 Hz), 159.33 (d, *J* = 238.8 Hz), 158.50 (d, *J* = 4.4 Hz), 147.70, 143.42, 140.88 (d, *J* = 2.3 Hz), 140.42, 138.57, 132.86, 132.24, 131.96, 131.65 (d, *J* = 8.1 Hz), 130.98 (d, *J* = 3.4 Hz),

129.44 (d,  $J = 9.7$  Hz), 129.15, 128.92, 128.46, 127.83 (d,  $J = 4.4$  Hz), 127.25 (d,  $J = 9.4$  Hz), 125.86, 125.32, 124.39, 123.63, 122.63, 121.72, 121.47, 116.70, 115.34 (d,  $J = 9.8$  Hz), 115.13 (d,  $J = 9.4$  Hz), 109.51 (d,  $J = 18.7$  Hz), 80.63, 60.35, 52.45, 13.51.

HRMS (ESI) Calc. for  $C_{39}H_{26}F_2N_2O_3$  [M+H]: 609.1984; found: 609.1980.

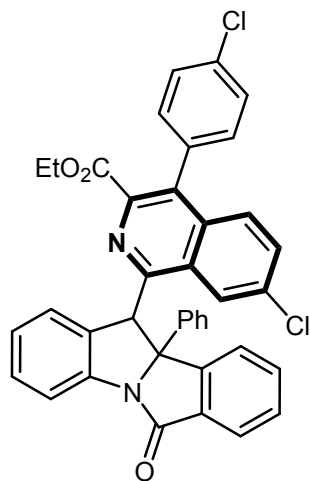

**ethyl 7-chloro-4-(4-chlorophenyl)-1-(6-oxo-10b-phenyl-10b,11-dihydro-6H-isoindolo[2,1-a]indol-11-yl)isoquinoline-3-carboxylate (5i)**

94.7 mg, 74% yield, pale yellow solid, MP = 131-132 °C.  $^1H$  NMR (400 MHz, DMSO)  $\delta$  9.31 (s, 1H), 7.92 – 7.75 (m, 4H), 7.61 (d,  $J = 7.6$  Hz, 1H), 7.54 – 7.17 (m, 10H), 7.13 (td,  $J = 7.6, 0.8$  Hz, 1H), 7.02 (d,  $J = 7.6$  Hz, 2H), 6.92 (d,  $J = 7.2$  Hz, 1H), 6.28 (s, 1H), 3.83 (d,  $J = 6.8$  Hz, 2H), 0.97 (t,  $J = 7.2$  Hz, 3H).  $^{13}C$  NMR (100 MHz, DMSO)  $\delta$  168.09, 165.08, 158.52, 151.42, 147.75, 143.44, 141.19, 140.35, 138.52, 134.48, 133.47, 133.39, 133.09, 132.95, 132.03, 131.52, 131.41, 129.06, 128.93, 128.50, 128.44, 128.37, 128.31, 127.89, 126.85, 125.93, 125.35, 124.43, 123.66, 122.71, 116.70, 80.59, 60.53, 52.29, 13.51.

HRMS (ESI) Calc. for  $C_{39}H_{26}Cl_2N_2O_3$  [M+H]: 641.1393; found: 641.1386.

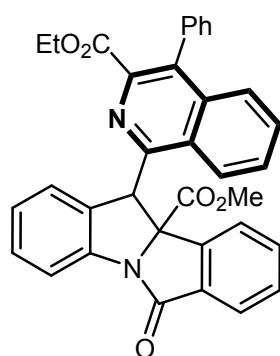

**methyl 11-(3-(ethoxycarbonyl)-4-phenylisoquinolin-1-yl)-6-oxo-6H-isoindolo[2,1-a]indole-10b(11H)-carboxylate (5j)**

78.7 mg, 72% yield, white solid, MP = 212-213 °C.  $^1H$  NMR (400 MHz,  $CDCl_3$ )  $\delta$  8.78 (s, 1H), 7.95 – 7.49 (m, 5H), 7.42 – 7.32 (m, 4H), 7.31 – 7.24 (m, 1H), 7.20 – 7.12 (m, 2H), 7.06 (td,  $J = 7.6, 0.8$  Hz, 2H), 6.95 (s, 1H), 6.85 (d,  $J = 7.6$  Hz, 1H), 6.33 (s, 1H), 3.92 (d,  $J = 6.8$  Hz, 2H), 3.75 (s, 3H), 1.01 (t,  $J = 7.2$  Hz, 3H).  $^{13}C$  NMR (100 MHz, DMSO)  $\delta$  171.26, 168.17, 165.48, 157.50, 141.44, 141.30, 140.52, 137.44, 134.83, 134.78, 133.47, 132.24, 131.39, 130.19, 129.57, 129.49, 129.33, 129.23, 128.54, 128.21,

128.15, 127.98, 126.30, 126.07, 125.75, 125.09, 124.60, 123.88, 122.69, 116.25, 80.31, 60.20, 53.82, 48.28, 13.39.

HRMS (ESI) Calc. for  $C_{35}H_{26}N_2O_5$  [M+H]: 555.1914; found: 555.1918.

## VI. Diversifications

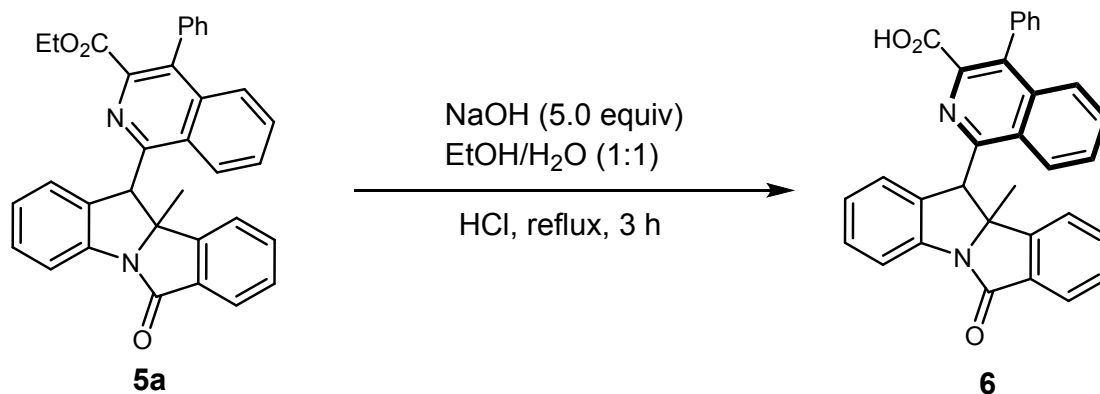

NaOH (5 equiv) was added to solution of the **5a** (0.1 mmol) in  $H_2O$  and EtOH (1:1) and was stirred at reflux for 3h. The solution acidified using 2N HCl, filtered and concentrated. The desired product was obtained by column chromatography using appropriate eluent.

### 1-(10b-methyl-6-oxo-10b,11-dihydro-6H-isoindolo[2,1- $\alpha$ ]indol-11-yl)-4-phenylisoquinoline-3-carboxylic acid (**6**)

84% yield, brown solid, MP = 258-259 °C.  $^1H$  NMR (400 MHz, DMSO)  $\delta$  11.99 (s, 1H), 9.01 (d,  $J$  = 8.4 Hz, 1H), 7.92 (t,  $J$  = 7.6 Hz, 1H), 7.77 (t,  $J$  = 7.6 Hz, 1H), 7.65 (d,  $J$  = 8.0 Hz, 1H), 7.58 (d,  $J$  = 7.2 Hz, 1H), 7.38 (d,  $J$  = 4.8 Hz, 5H), 7.33 – 7.21 (m, 2H), 7.18 – 7.06 (m, 3H), 6.88 (d,  $J$  = 7.6 Hz, 2H), 5.80 (s, 1H), 1.85 (s, 3H).  $^{13}C$  NMR (100 MHz, DMSO)  $\delta$  168.15, 166.63, 158.64, 148.21, 141.46, 140.11, 139.17, 135.12, 134.97, 132.89, 131.68, 131.06, 129.64, 129.57, 129.10, 128.76, 128.24, 128.11, 128.03, 127.75, 126.16, 125.87, 125.64, 124.33, 123.63, 121.98, 116.80, 75.59, 50.92, 27.72.

HRMS (ESI) Calc. for  $C_{32}H_{22}N_2O_3$  [M+H]: 483.1703; found:483.1705.

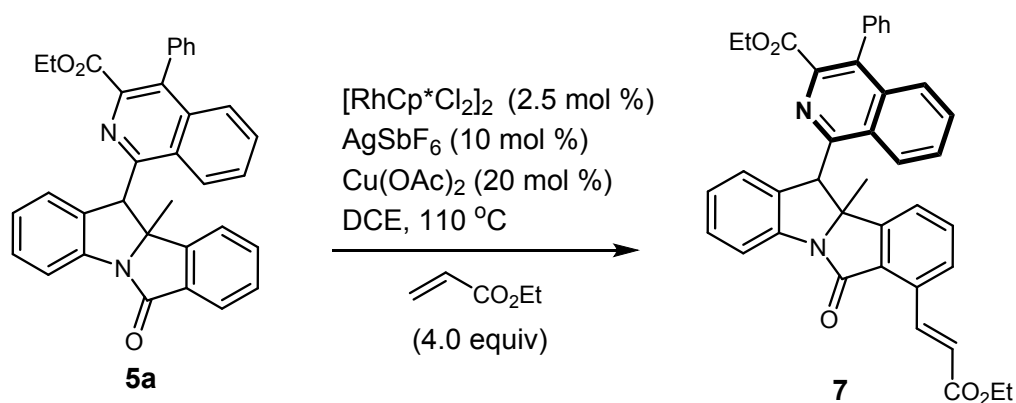

To a 1 mL screw-capped vial equipped with a 10 x 5 mm spinvane-shaped Teflon stirrer bar were charged with **5a** (0.1 mmol), ethyl acrylate (0.4 mmol, 4 equiv),  $[Cp^*RhCl_2]_2$  (0.0025 mmol, 2.5 mol %),  $AgSbF_6$  (0.01 mmol, 10 mol %), and  $Cu(OAc)_2$  (0.02 mmol, 20 mol %) with 1,2-dichloroethane (1 mL) in air condition. The resulting mixture was sealed with Teflon-lined cap

and stirred at 110 °C for 12 h in an oil bath. The reaction was cooled to room temperature, filtered through a plug of celite and washed with dichloromethane (15 mL). The desired product was obtained by column chromatography using appropriate eluent.

**ethyl (E)-1-(7-(3-ethoxy-3-oxoprop-1-en-1-yl)-10b-methyl-6-oxo-10b,11-dihydro-6H-isoindolo[2,1-*a*]indol-11-yl)-4-phenylisoquinoline-3-carboxylate (7)**

79% yield, yellow solid, MP = 264-265 °C. <sup>1</sup>H NMR (400 MHz, DMSO) δ 8.98 (d, *J* = 8.4 Hz, 1H), 8.30 (d, *J* = 16.0 Hz, 1H), 7.92 (t, *J* = 7.6 Hz, 1H), 7.87 (d, *J* = 8.0 Hz, 1H), 7.79 (t, *J* = 7.6 Hz, 1H), 7.56 (d, *J* = 7.6 Hz, 1H), 7.38 (dd, *J* = 21.2, 7.2 Hz, 5H), 7.27 (t, *J* = 7.6 Hz, 1H), 7.22 – 7.07 (m, 3H), 6.92 (d, *J* = 7.6 Hz, 1H), 6.82 (s, 1H), 6.68 (d, *J* = 16.1 Hz, 1H), 5.75 (s, 1H), 4.28 – 4.14 (m, 2H), 3.76 (q, *J* = 6.9 Hz, 2H), 1.87 (s, 3H), 1.28 (t, *J* = 7.2 Hz, 3H), 0.83 (t, *J* = 7.2 Hz, 3H). <sup>13</sup>C NMR (100 MHz, DMSO) δ 168.98, 166.98, 166.16, 159.16, 148.05, 143.33, 142.09, 141.98, 141.07, 135.30, 135.03, 133.04, 132.30, 131.64, 130.03, 129.80, 129.33, 128.68, 128.60, 128.42, 126.64, 126.21, 216.13, 126.02, 125.03, 124.07, 122.34, 117.71, 77.12, 60.60, 60.43, 51.14, 27.24, 14.77, 13.89.

HRMS (ESI) Calc. for C<sub>39</sub>H<sub>32</sub>N<sub>2</sub>O<sub>5</sub> [M+H]: 609.2384; found:609.2386.

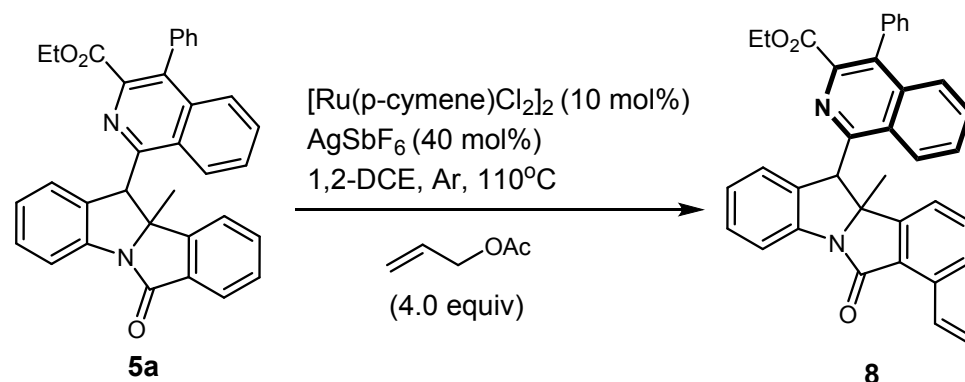

An oven-dried, screw-cap vial was charged with [RuCl<sub>2</sub>(p-cymene)]<sub>2</sub> (0.01 mmol, 10 mol%), AgSbF<sub>6</sub> (0.02 mmol, 20 mol%) and DCE (1 mL). Then, **5a** (1.0 equiv., 0.1 mmol) and allyl acetate (4 equiv., 0.4 mmol) were added into the solution in sequence. The vial was sealed under argon and heated to 110 °C with stirring for 18 hours. After cooling down, the mixture was diluted with DCM, filtered and washed with water and brine. The organic layer was dried, filtered and concentrated to give the crude product which was directly applied to a flash column chromatography (EtOAc/hexanes mixtures).

**ethyl (E)-1-(10b-methyl-6-oxo-7-(prop-1-en-1-yl)-10b,11-dihydro-6H-isoindolo[2,1-*a*]indol-11-yl)-4-phenylisoquinoline-3-carboxylate (8)**

61% yield, yellow solid, MP = 264-265 °C. <sup>1</sup>H NMR (400 MHz, DMSO) δ 8.96 (d, *J* = 8.4 Hz, 1H), 7.91 (t, *J* = 7.6 Hz, 1H), 7.82 – 7.71 (m, 1H), 7.62 – 7.49 (m, 2H), 7.45 – 7.36 (m, 4H), 7.28 – 7.06 (m, 6H), 6.92 (d, *J* = 7.6 Hz, 1H), 6.85 (s, 1H), 6.39– 6.30 (m, 1H), 5.66 (s, 1H), 3.78 (q, *J* = 7.2 Hz, 2H), 1.93 (dd, *J* = 6.4, 1.2 Hz, 3H), 1.82 (s, 3H), 0.87 (t, *J* = 7.2 Hz, 3H). <sup>13</sup>C NMR (100 MHz, DMSO) δ 168.44, 165.81, 158.87, 147.60, 141.66, 141.20, 138.07, 134.87, 134.55, 133.31, 131.48, 131.09, 129.59, 129.06, 128.79, 128.32, 128.23, 128.14, 127.95, 126.15, 125.73, 125.65, 125.23, 124.39, 124.23, 123.38, 121.73, 76.39, 60.16, 50.64, 26.88, 18.77, 13.46.

HRMS (ESI) Calc. for C<sub>37</sub>H<sub>30</sub>N<sub>2</sub>O<sub>3</sub> [M+H]: 551.2329; found: 551.2321.

## VII. References

- [1] C. Shen, R.-R. Liu, R.-J. Fan, Y.-L. Li, T.-F. Xu, J.-R. Gao, Y.-X. Jia, *J. Am. Chem. Soc.* 2015, **137**, 4936.
- [2] D. A. Petrone, A. Yen, N. Zeidan, M. Lautens, *Org. Lett.* 2015, **17**, 4838.
- [3] A. D. Silvia, B. Luca, B. Andrea, D. Gianluca, G. Giuseppe, R. Renata, *Org. Biomol. Chem.* 2005, **3**, 97.
- [4] W.-Q. Shi, S. Liu, C. -Z. Wang, Y. Huang, F. -L. Qing, X. -H. Xu, *J. Org. Chem.* 2018, **83**, 15236.

## VIII. Copies of $^1\text{H}$ and $^{13}\text{C}$ NMR Spectra

1a

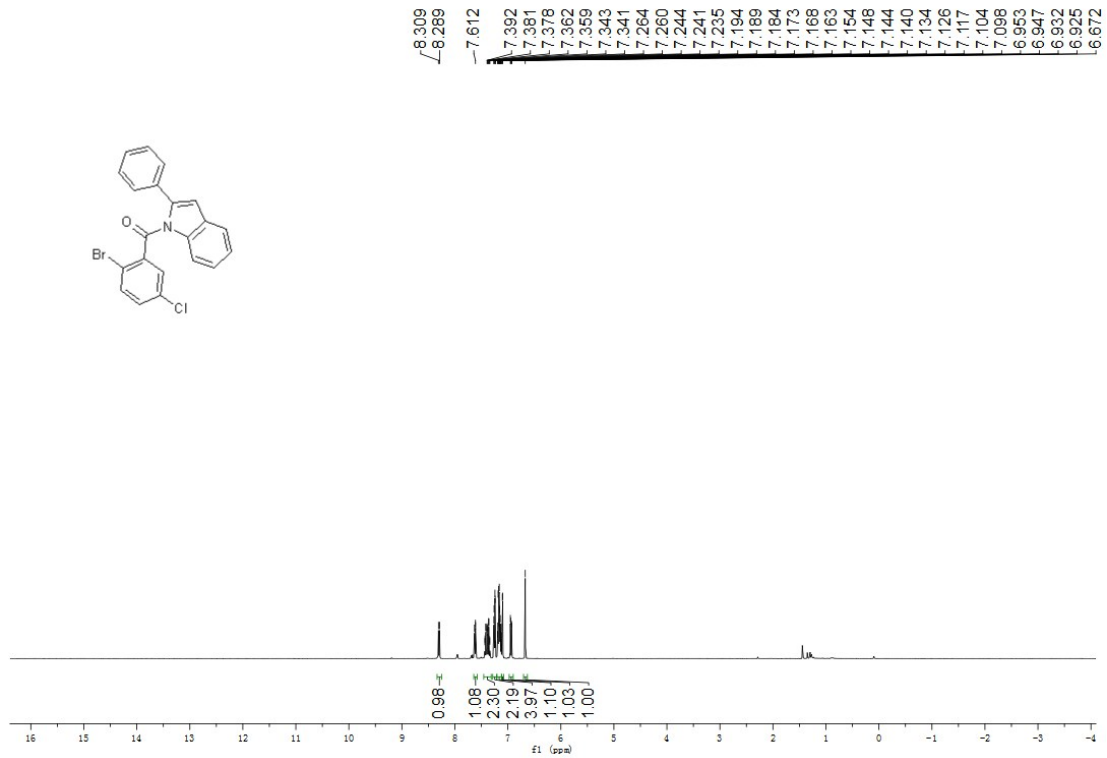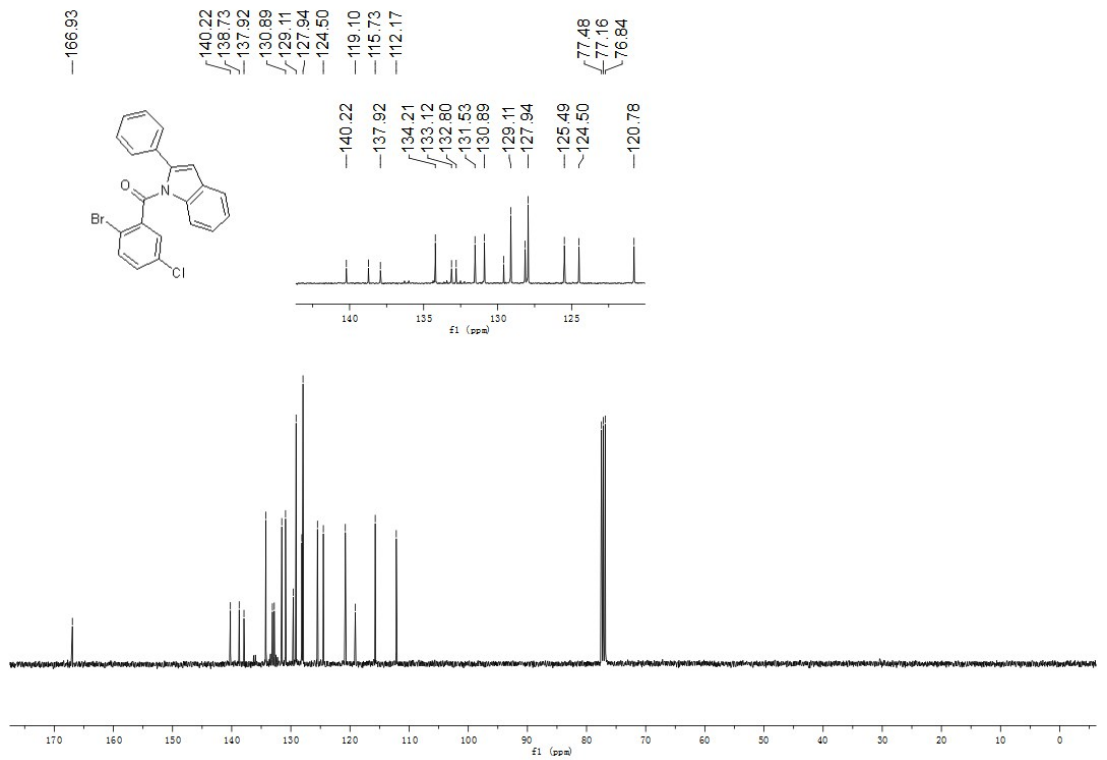

1b



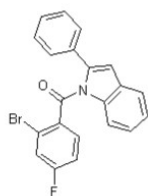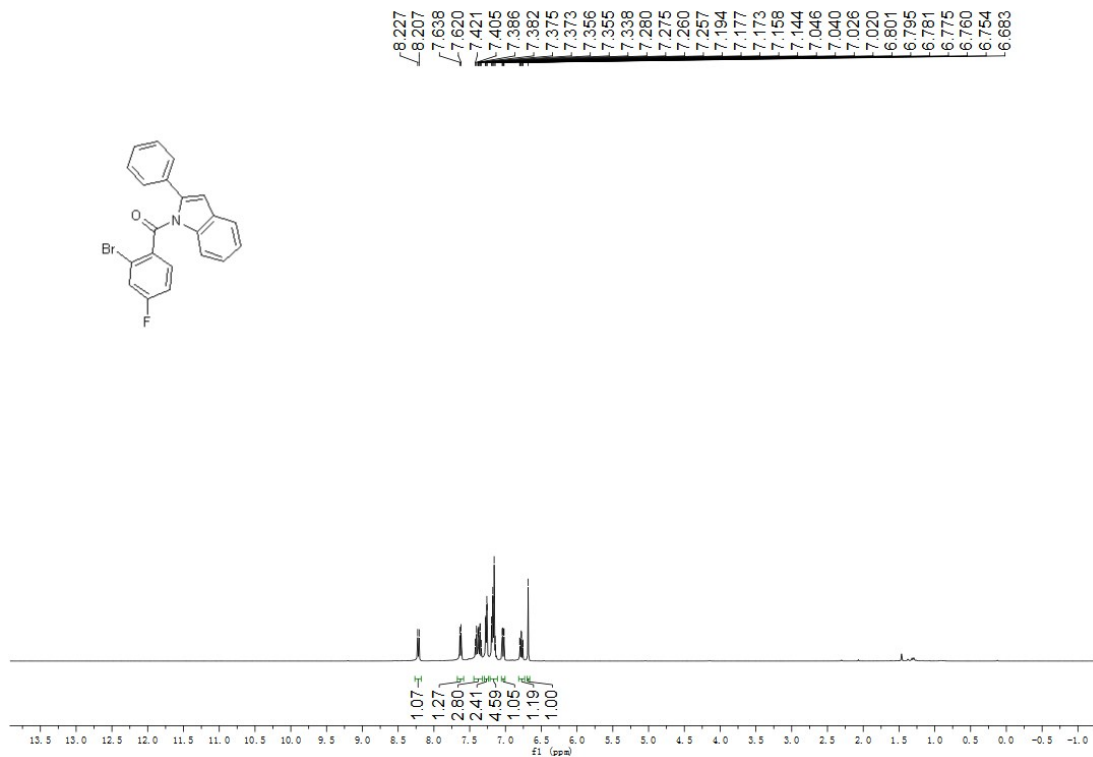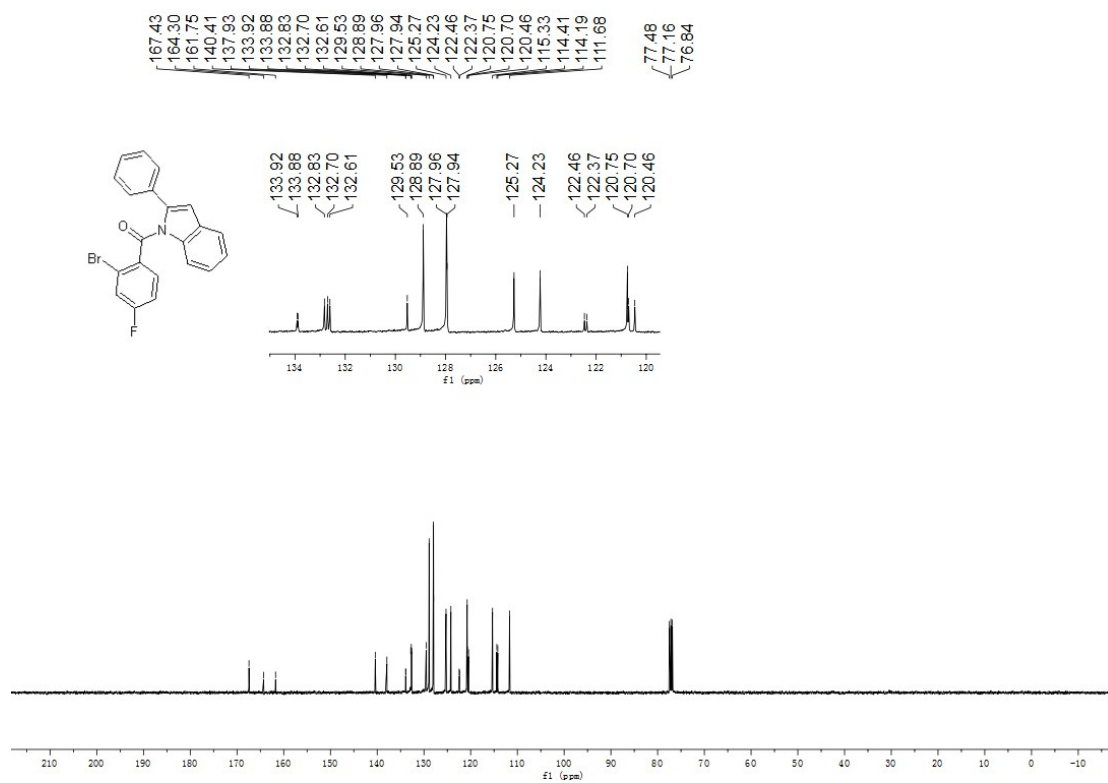

1c

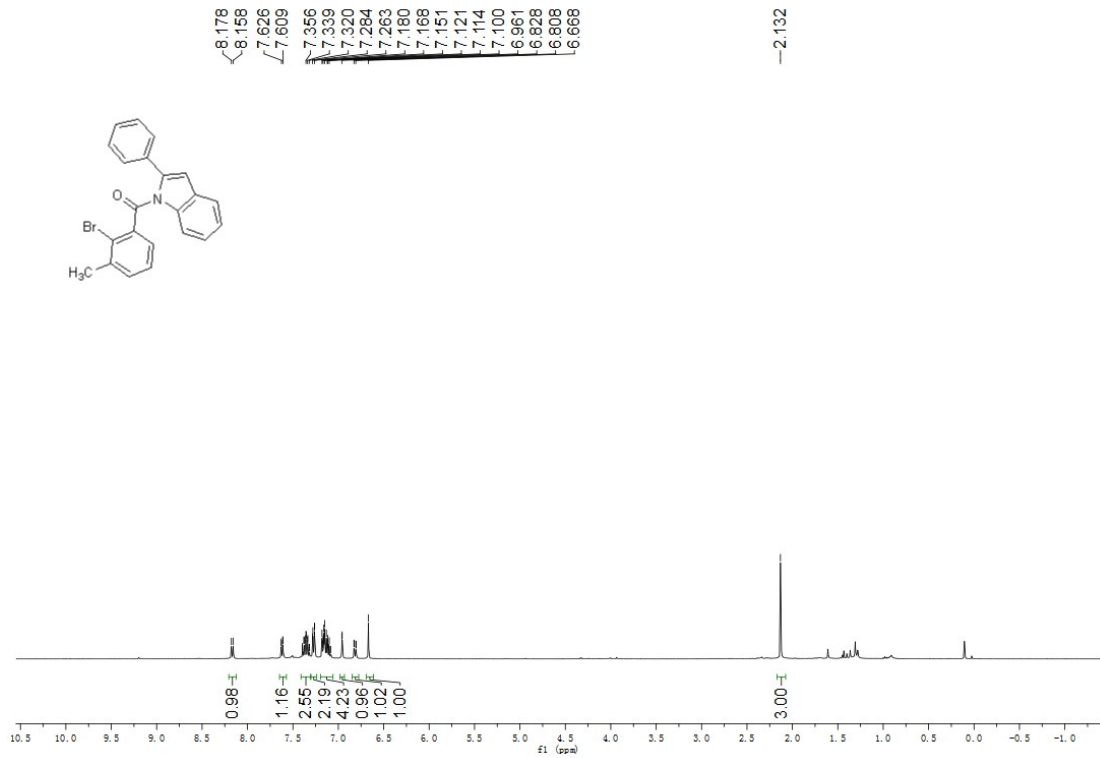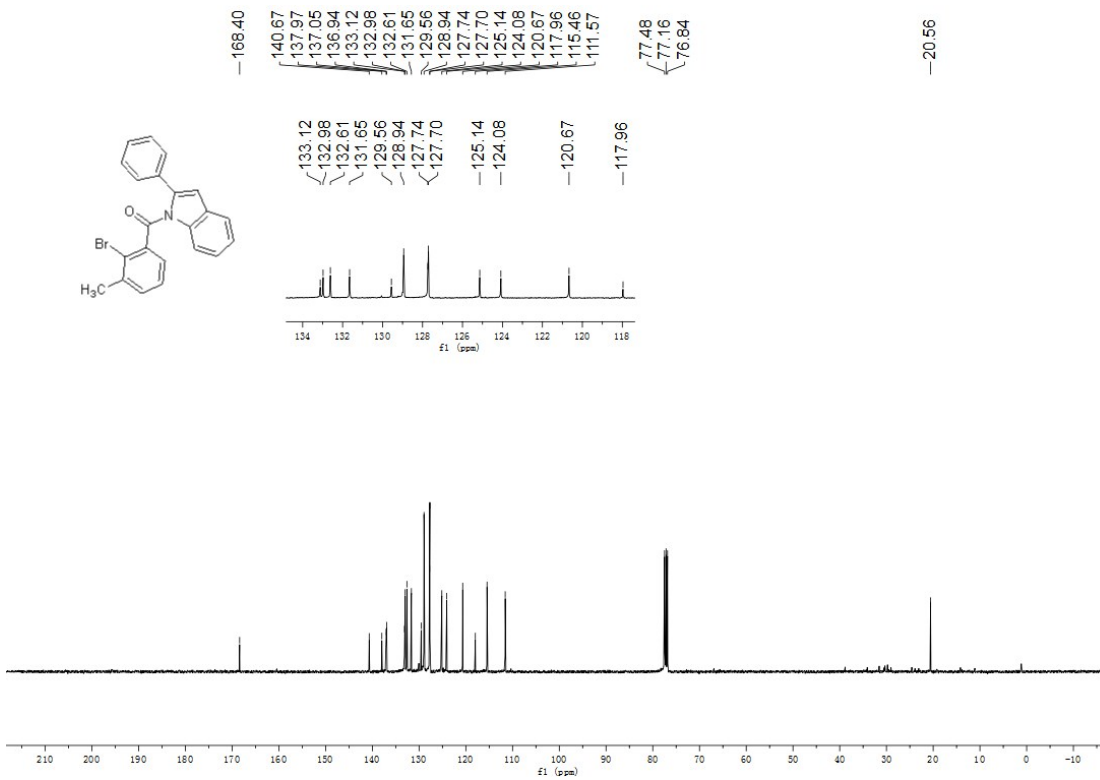

1d

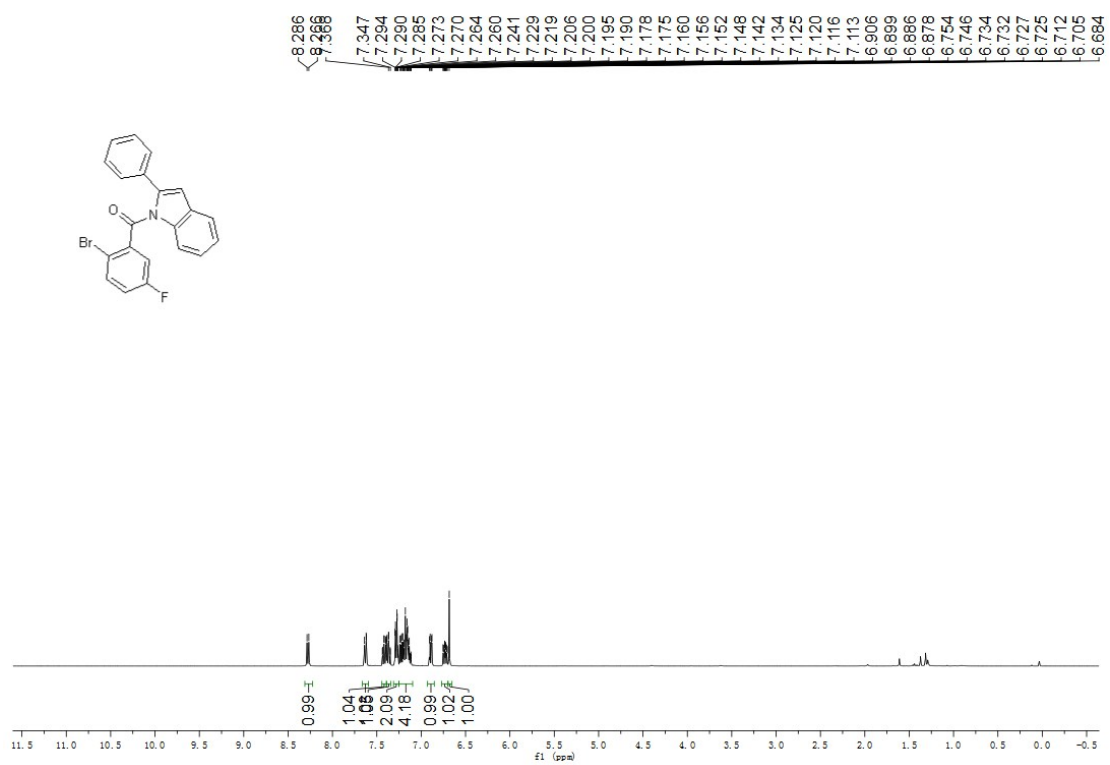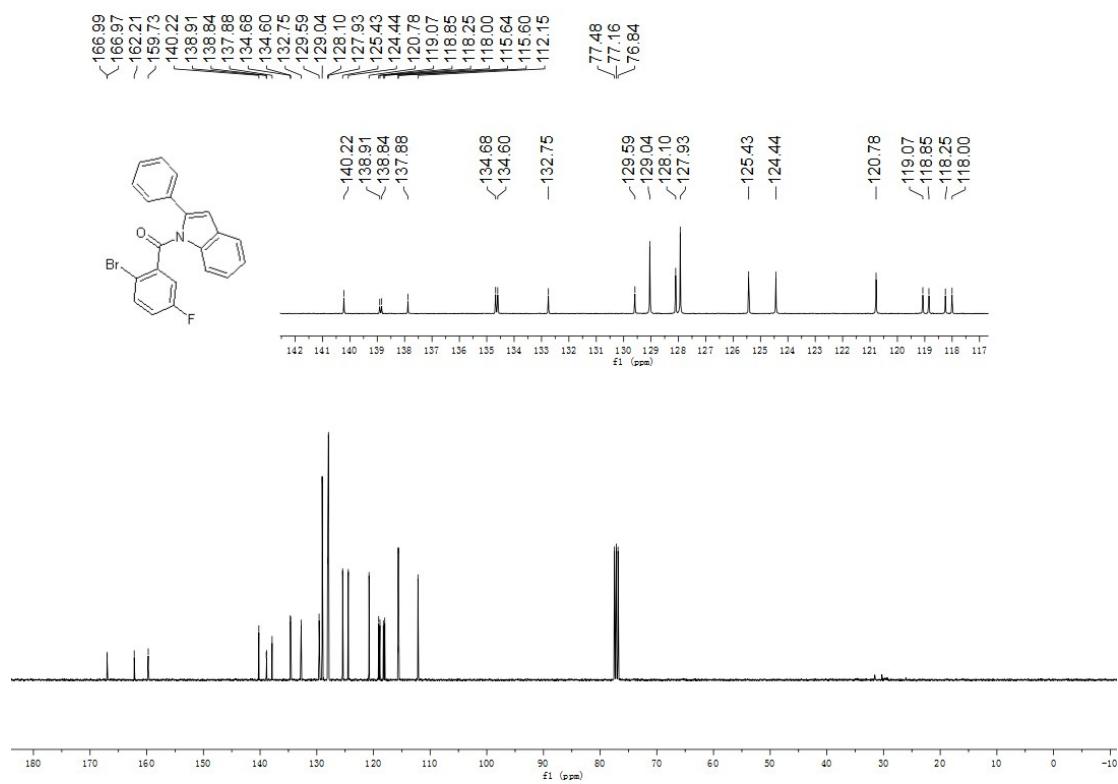

3a

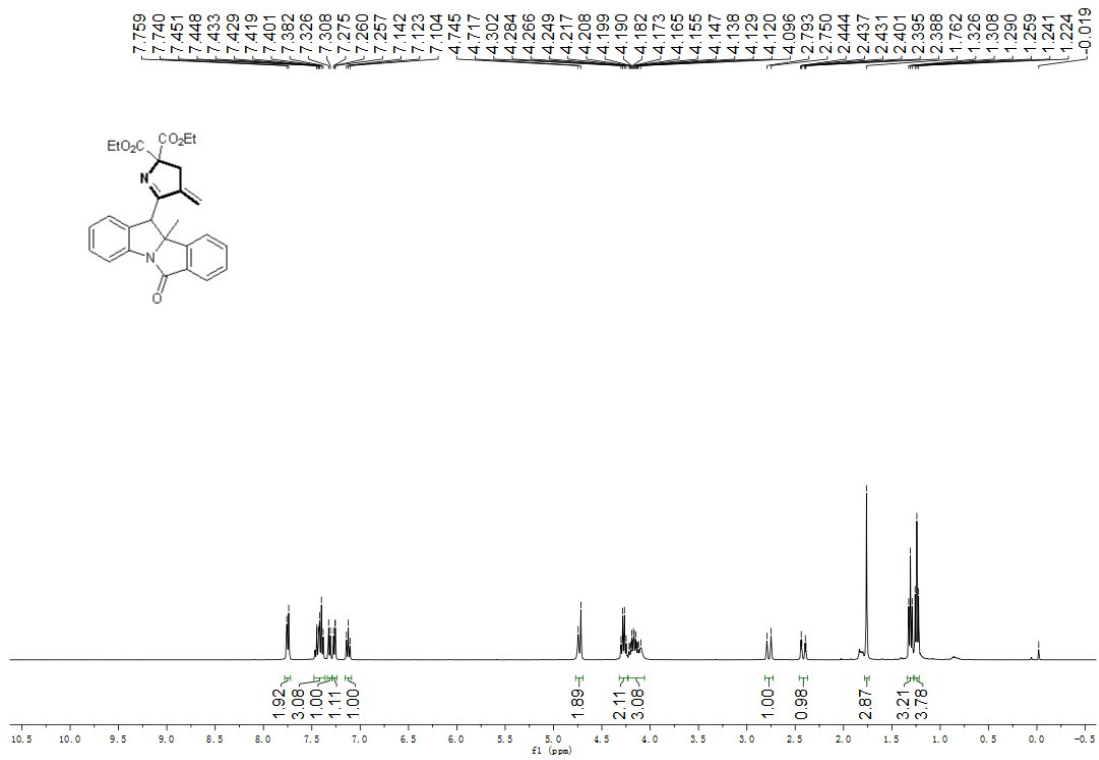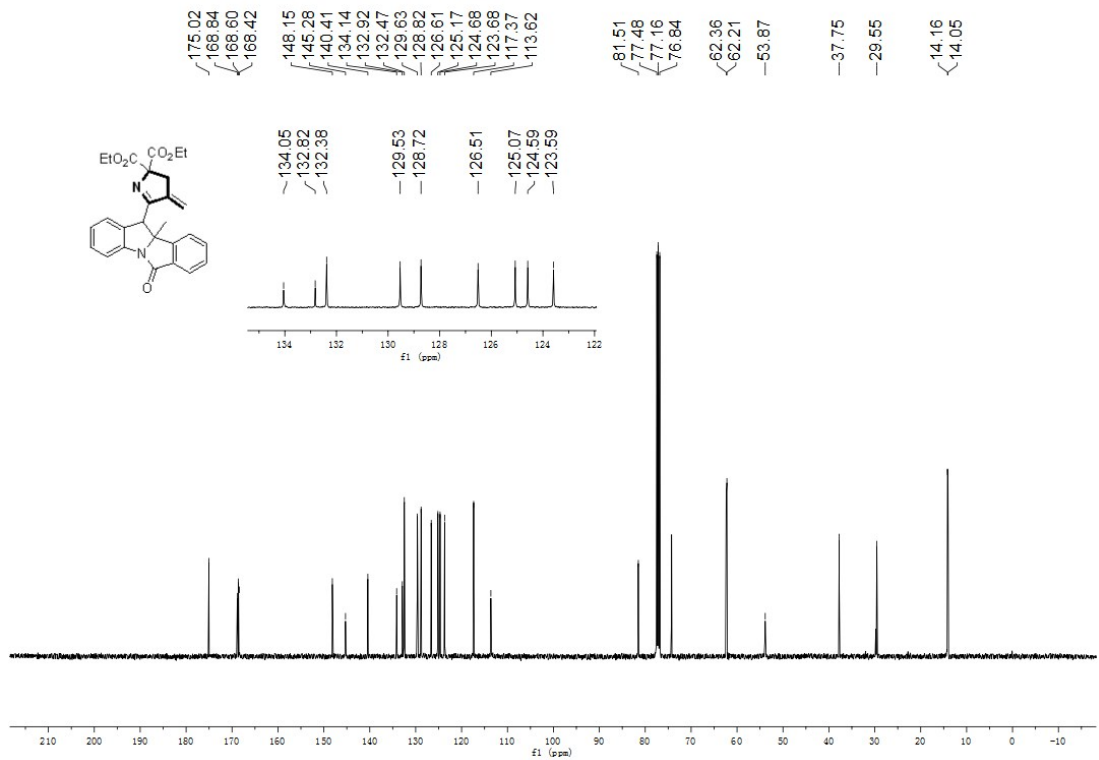

3b

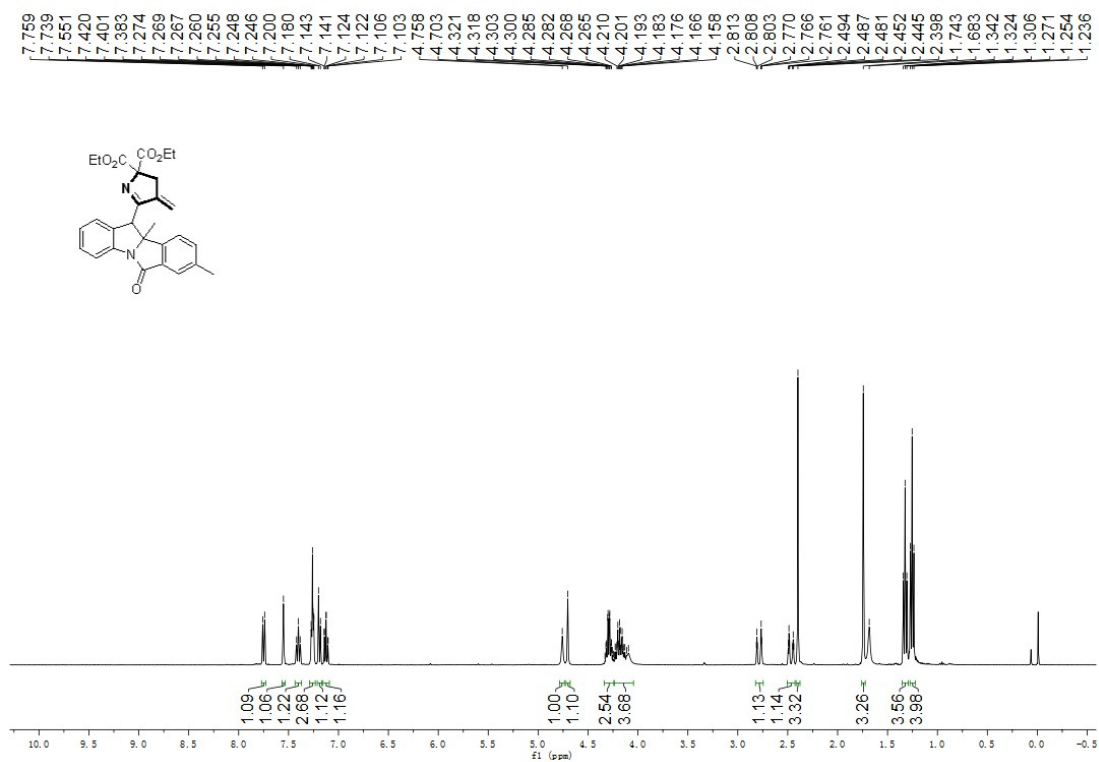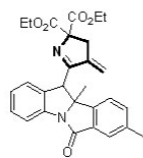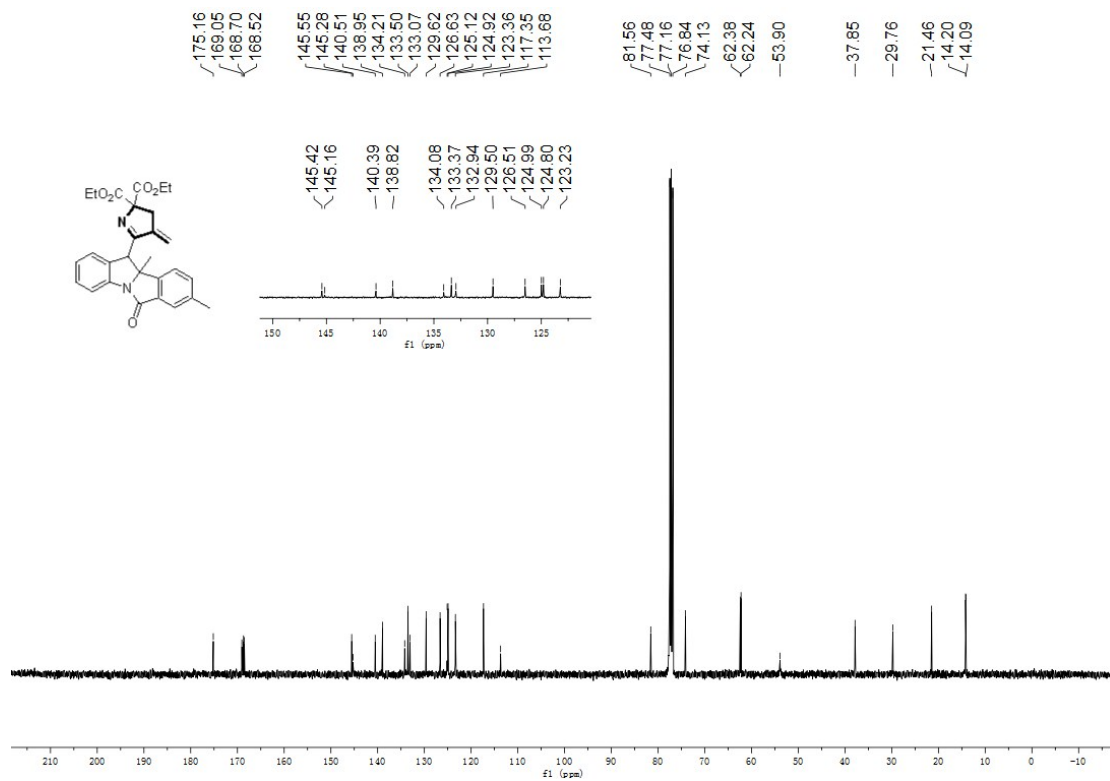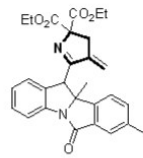

3c

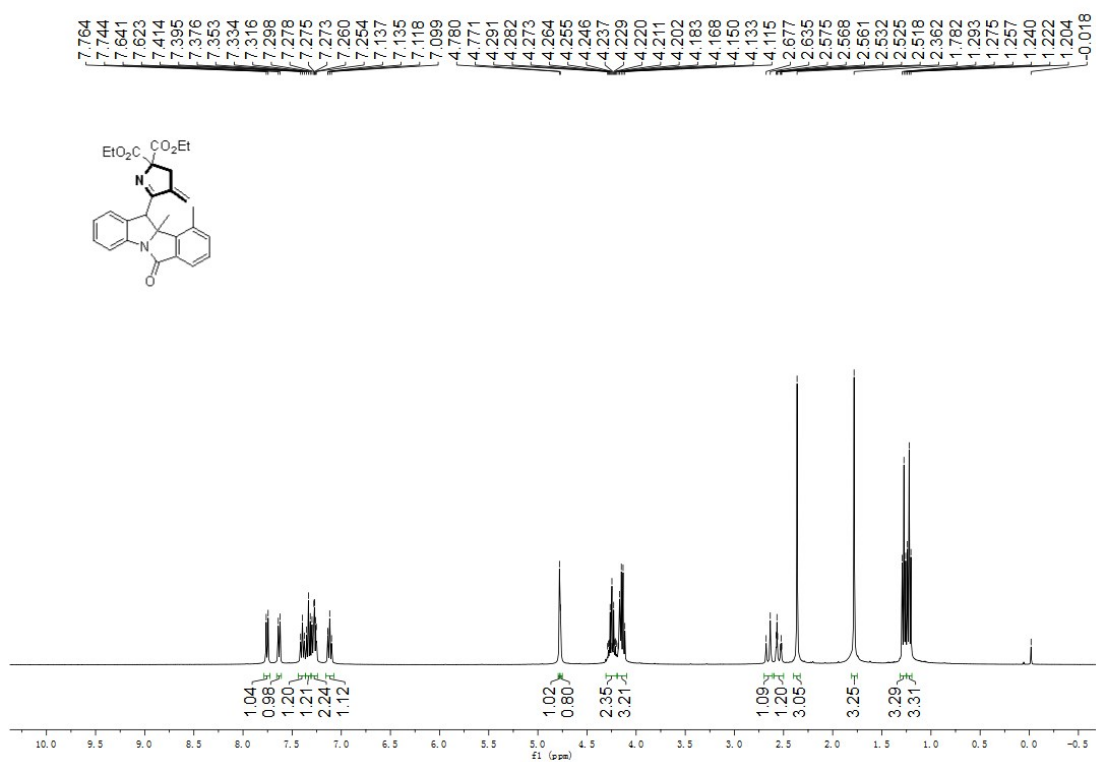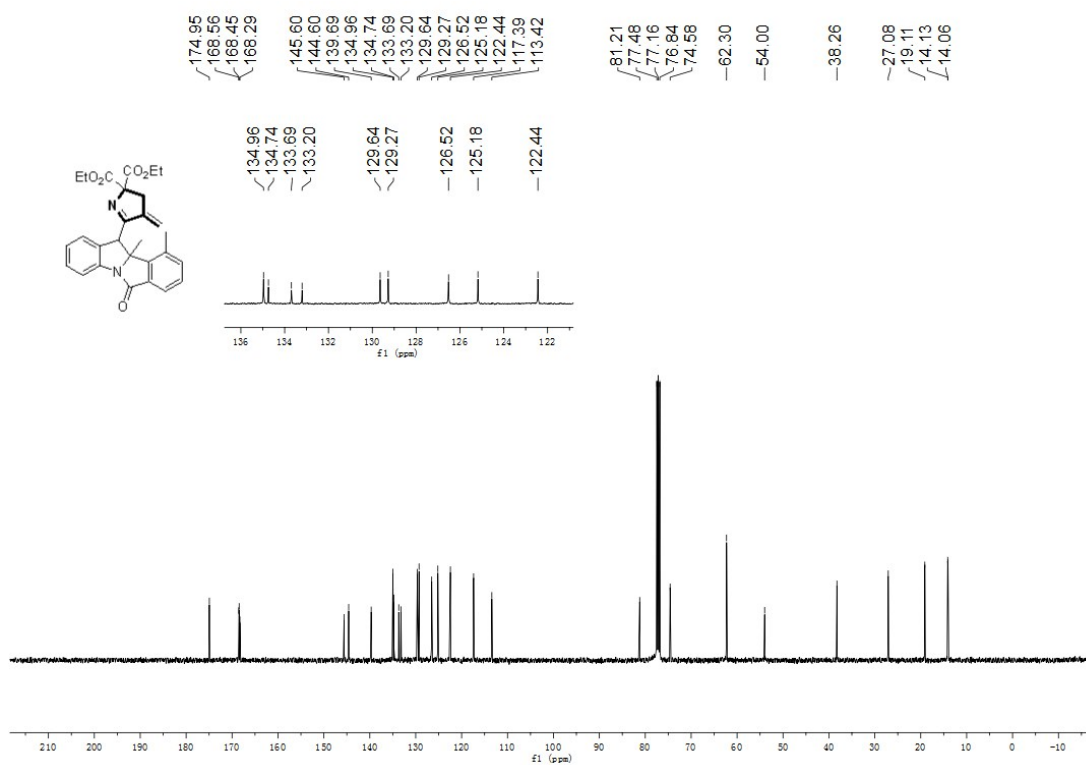

3d

7.765  
7.746  
7.432  
7.413  
7.394  
7.287  
7.266  
7.246  
7.234  
7.226  
7.157  
7.138  
7.136  
7.119  
7.117  
7.1025  
7.019  
7.003  
6.997  
4.782  
4.706  
4.318  
4.300  
4.283  
4.265  
4.249  
4.240  
4.231  
4.222  
4.209  
4.204  
4.192  
4.187  
4.174  
4.165  
4.157  
4.148  
4.097  
3.840  
2.858  
2.854  
2.849  
2.815  
2.811  
2.806  
2.511  
2.504  
2.497  
2.461  
2.454  
1.753  
1.343  
1.325  
1.307  
1.283  
1.265  
1.248

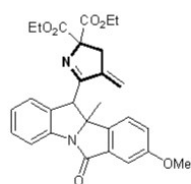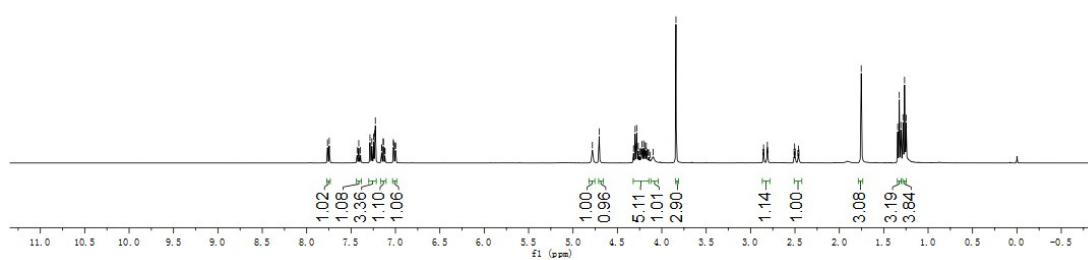

175.11  
168.78  
168.62  
168.42  
160.40  
145.31  
140.50  
140.39  
134.31  
134.25  
129.57  
126.64  
125.13  
124.53  
120.58  
117.29  
113.58  
107.30  
81.50  
77.48  
77.16  
76.84  
73.95  
62.33  
62.16  
55.72  
53.91  
37.84  
29.65  
14.15  
14.05

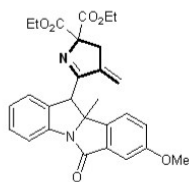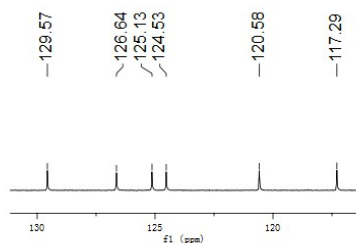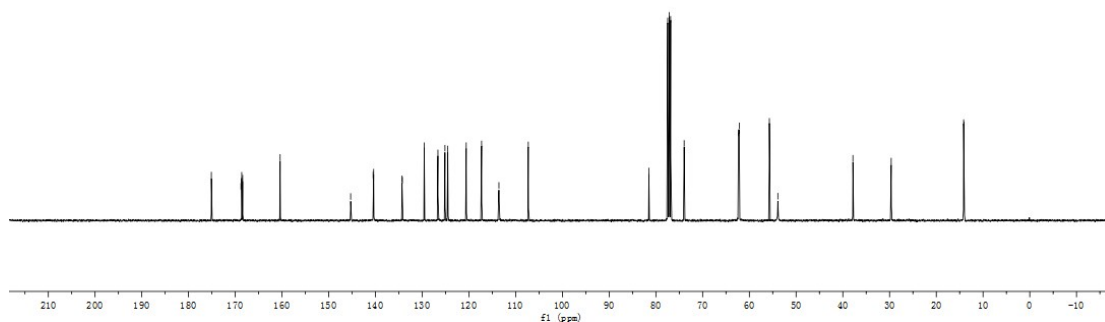

3e

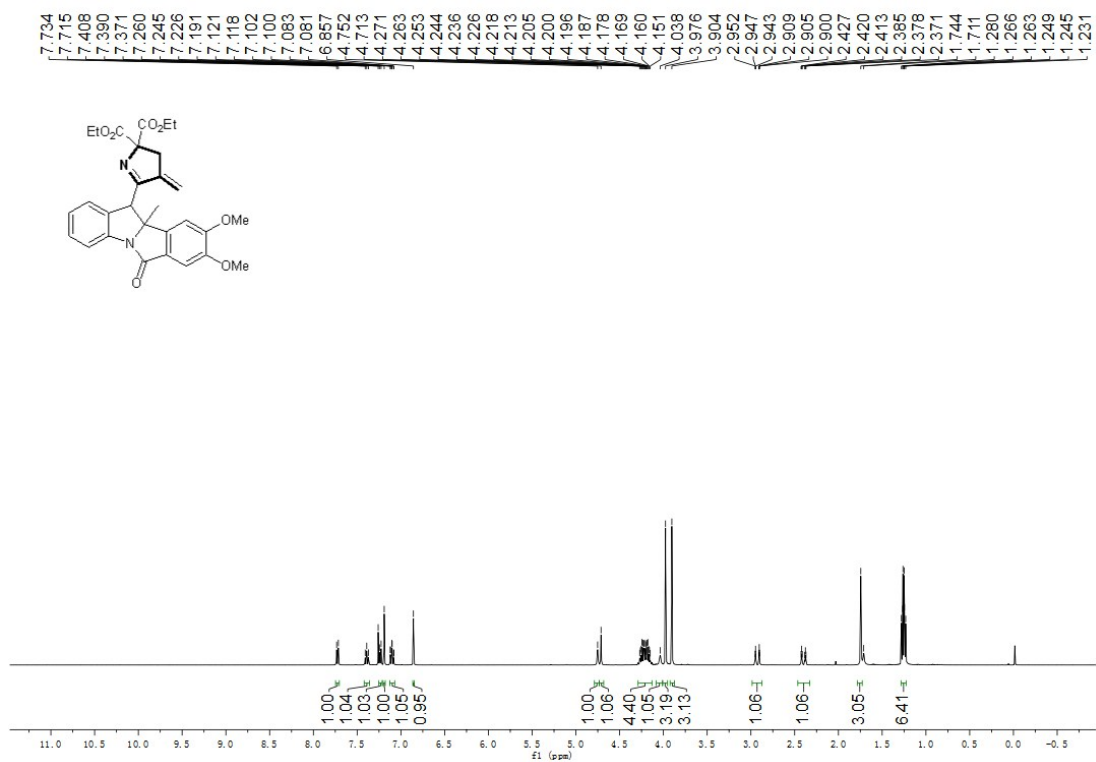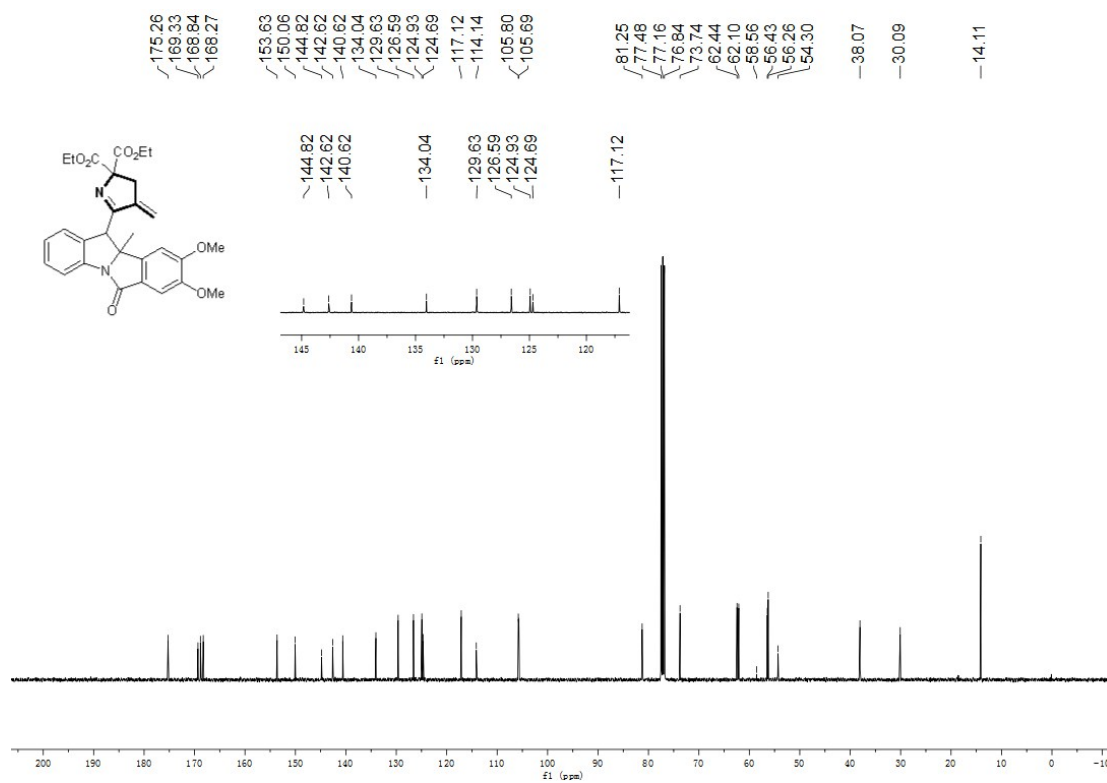



3f

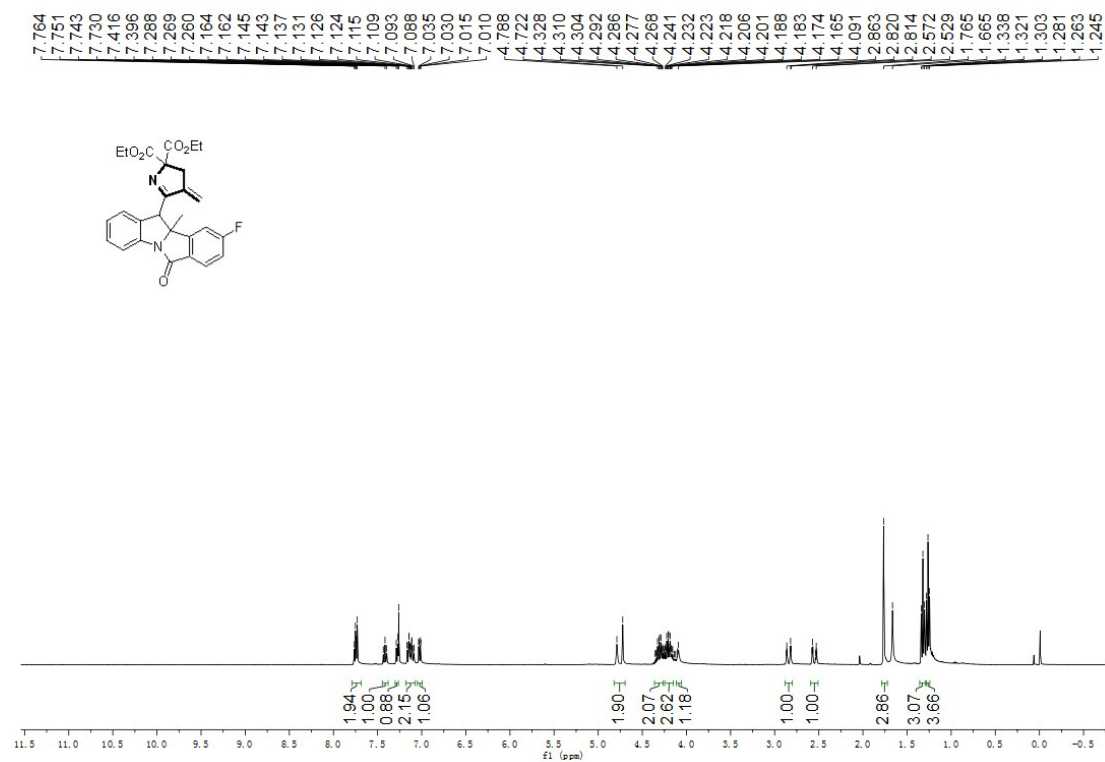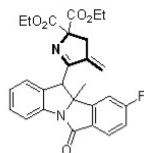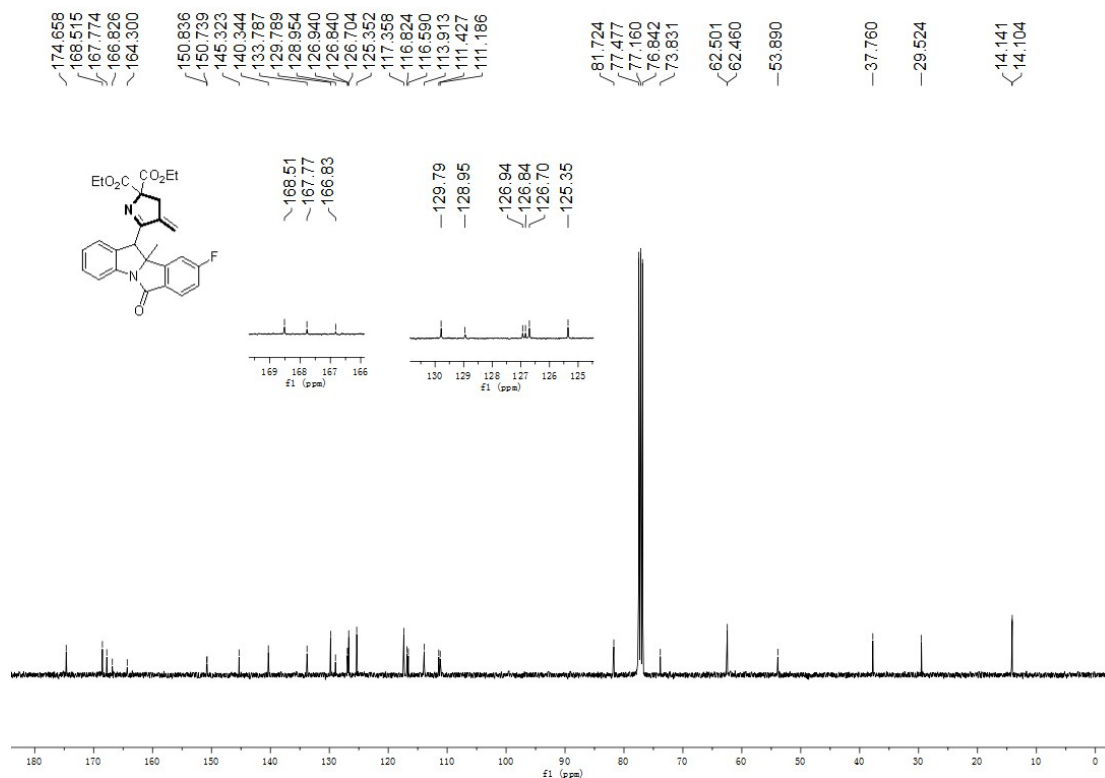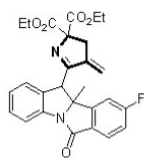

3g

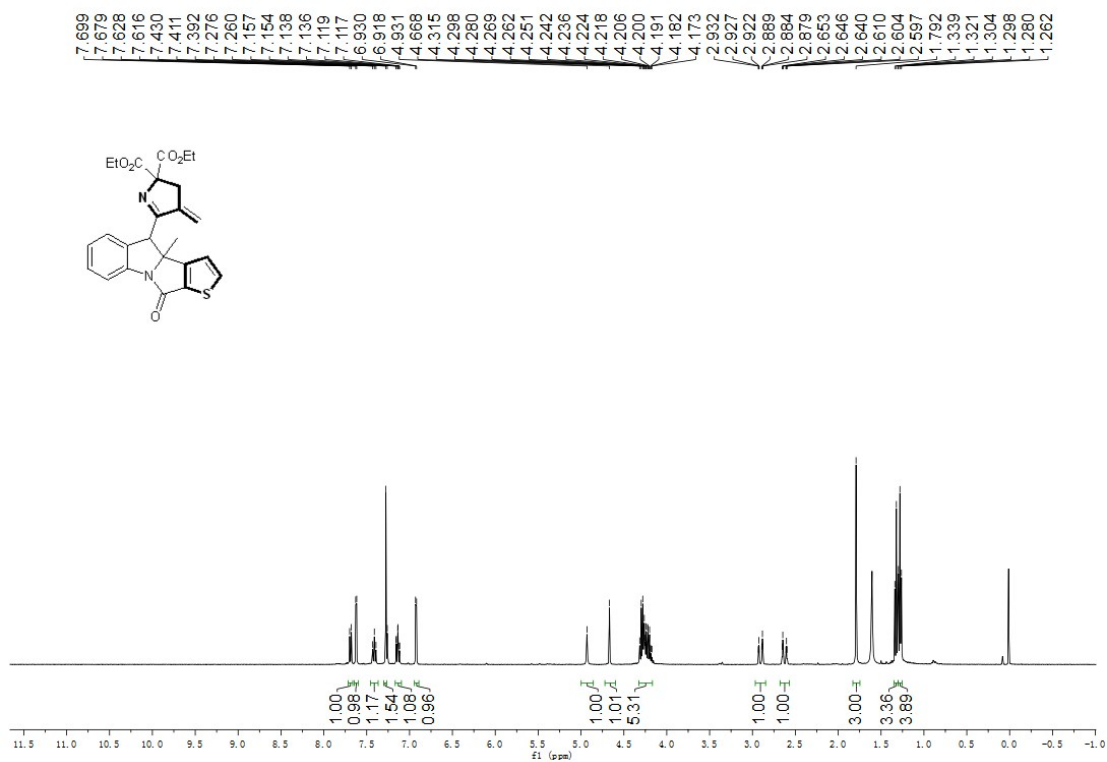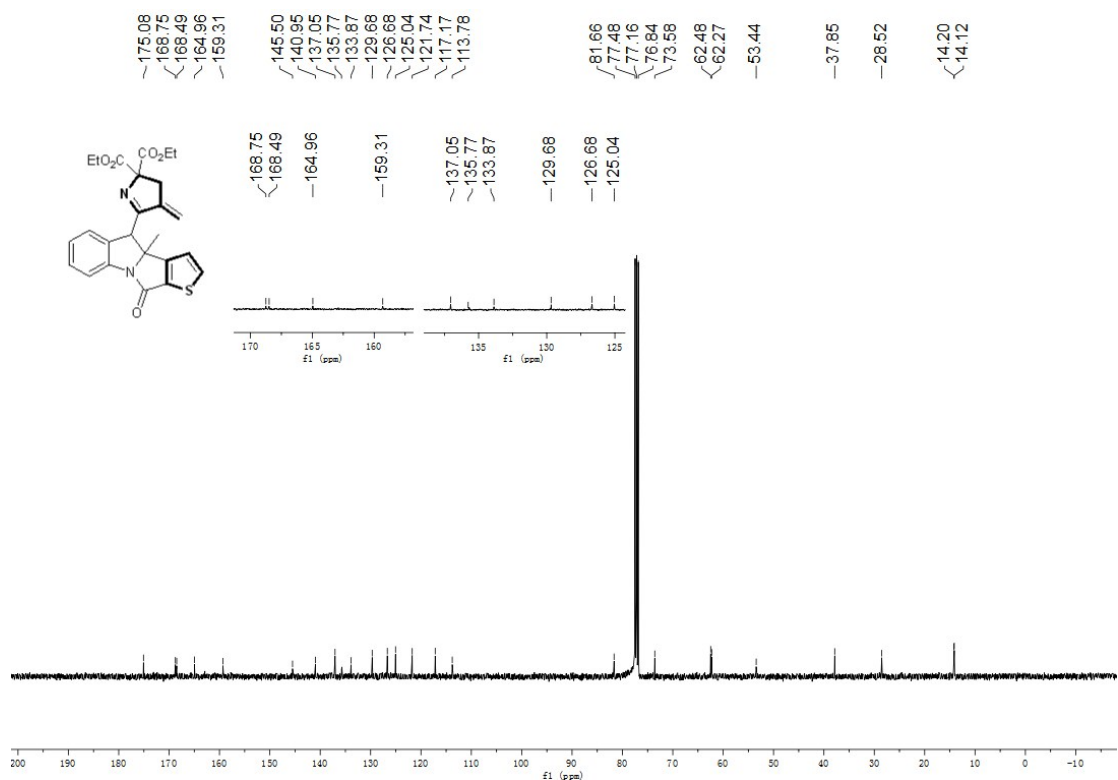

3h

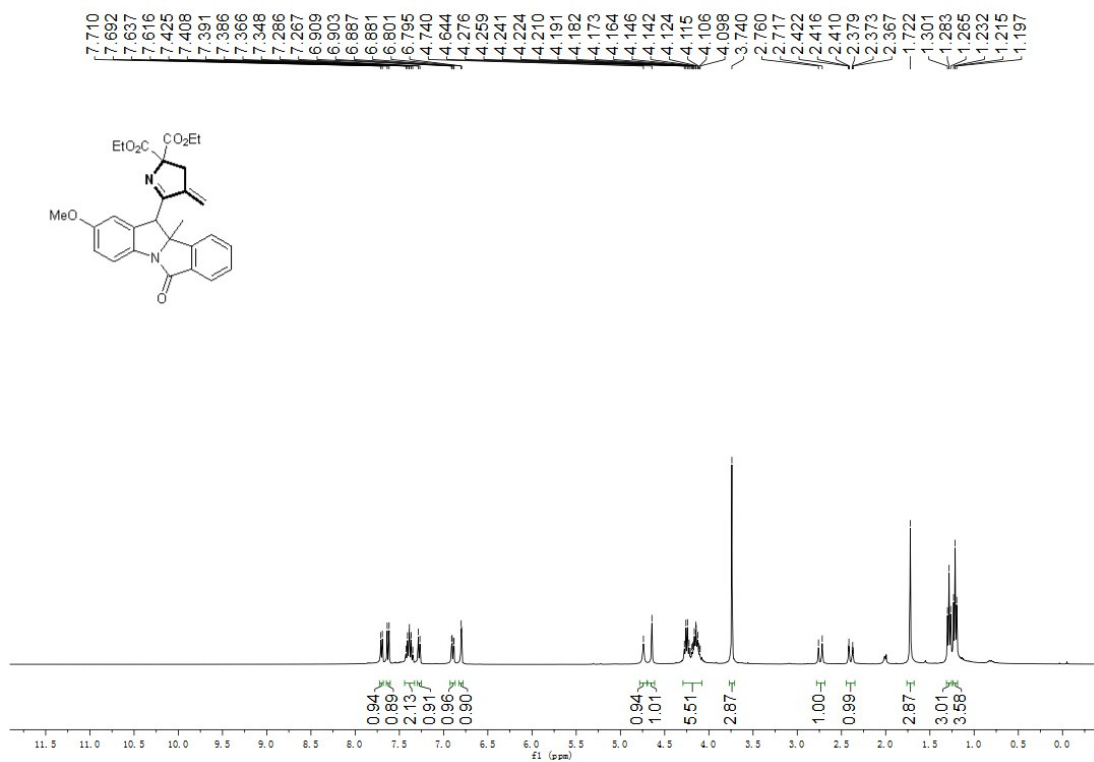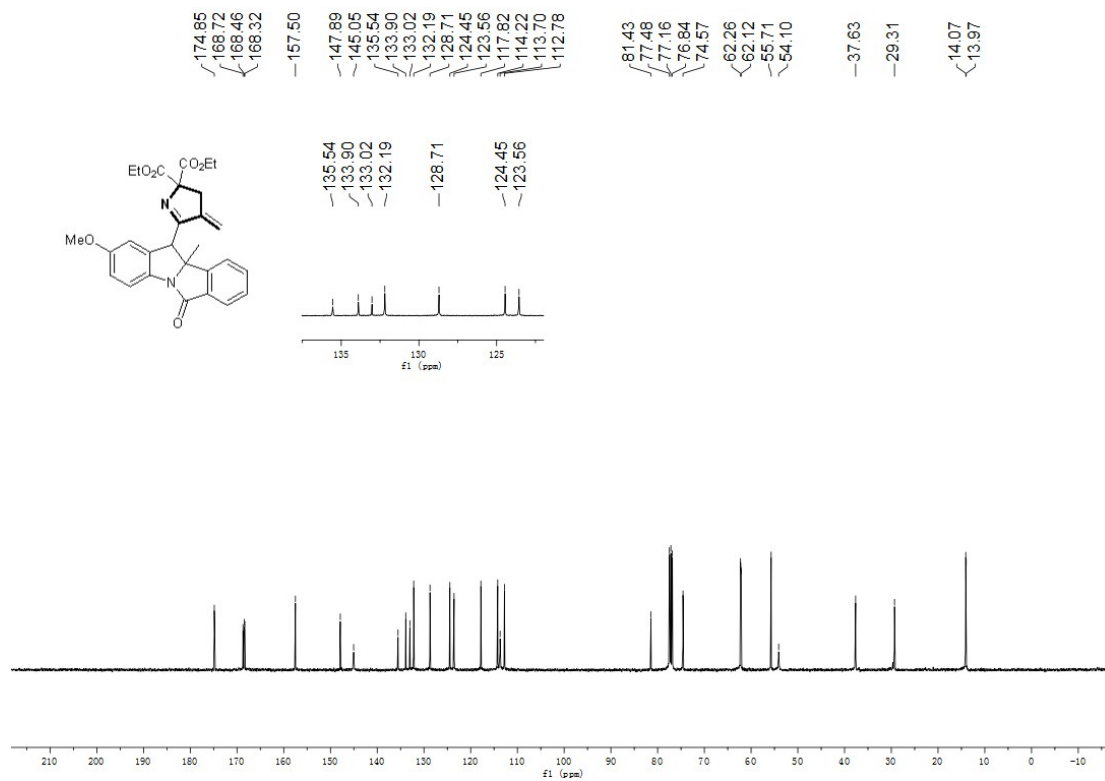

3i

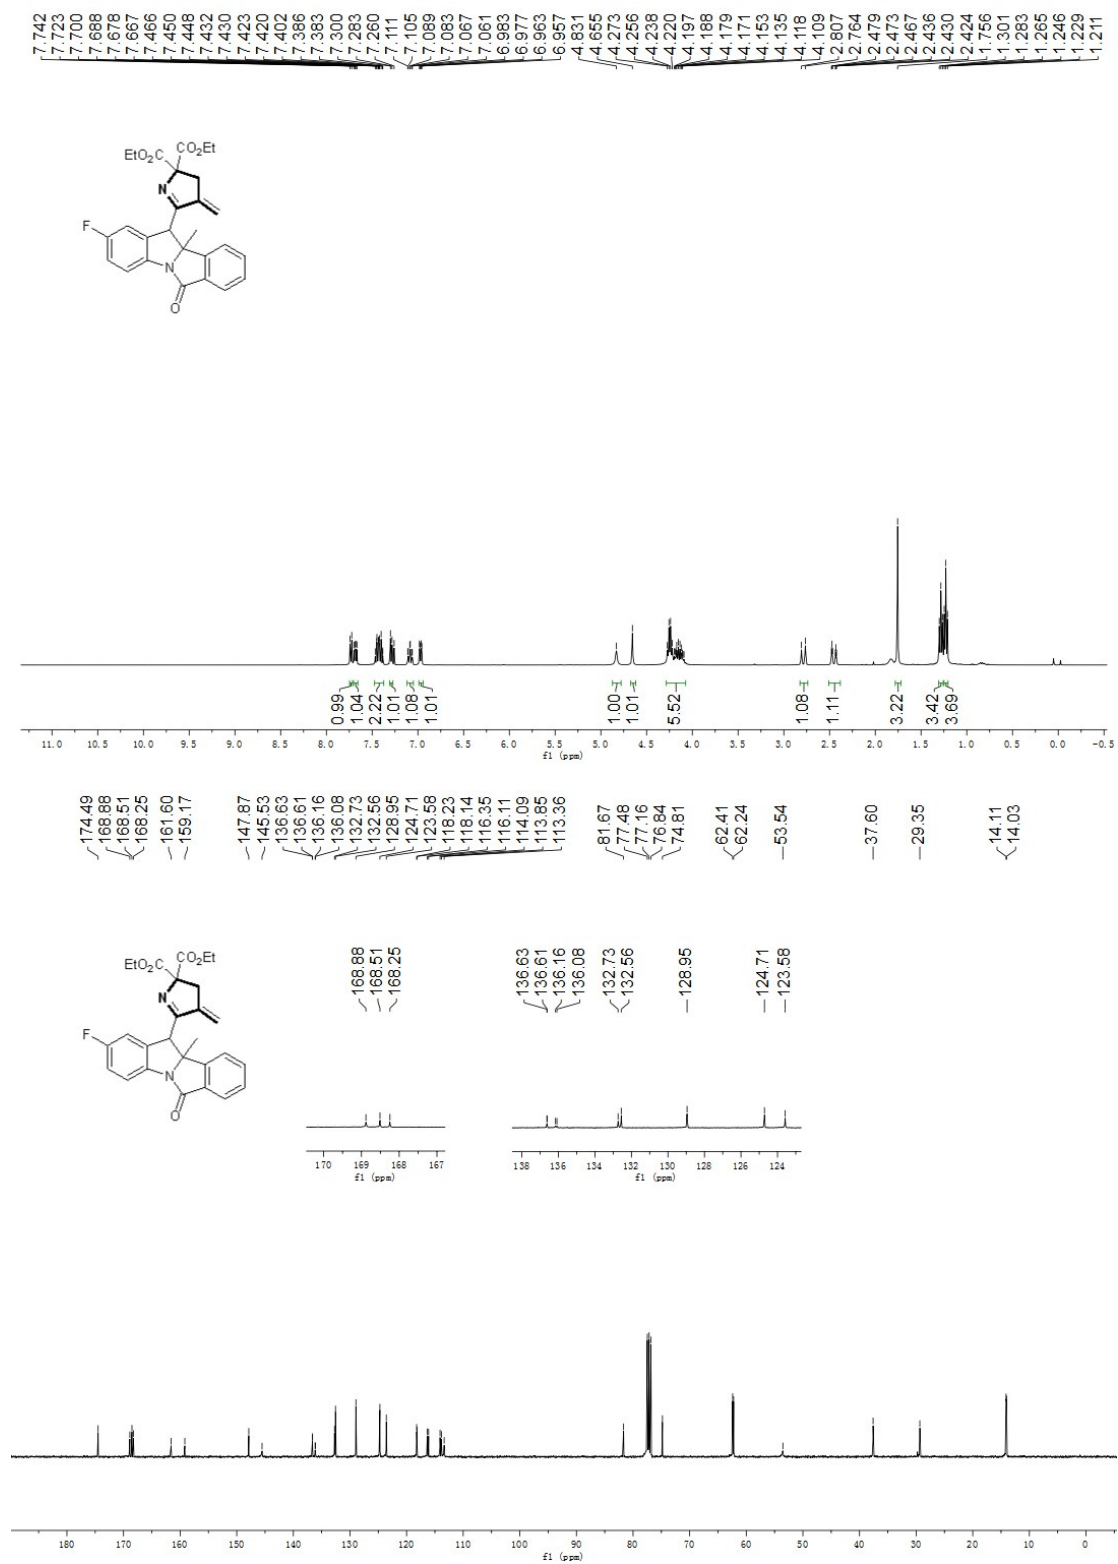

3j

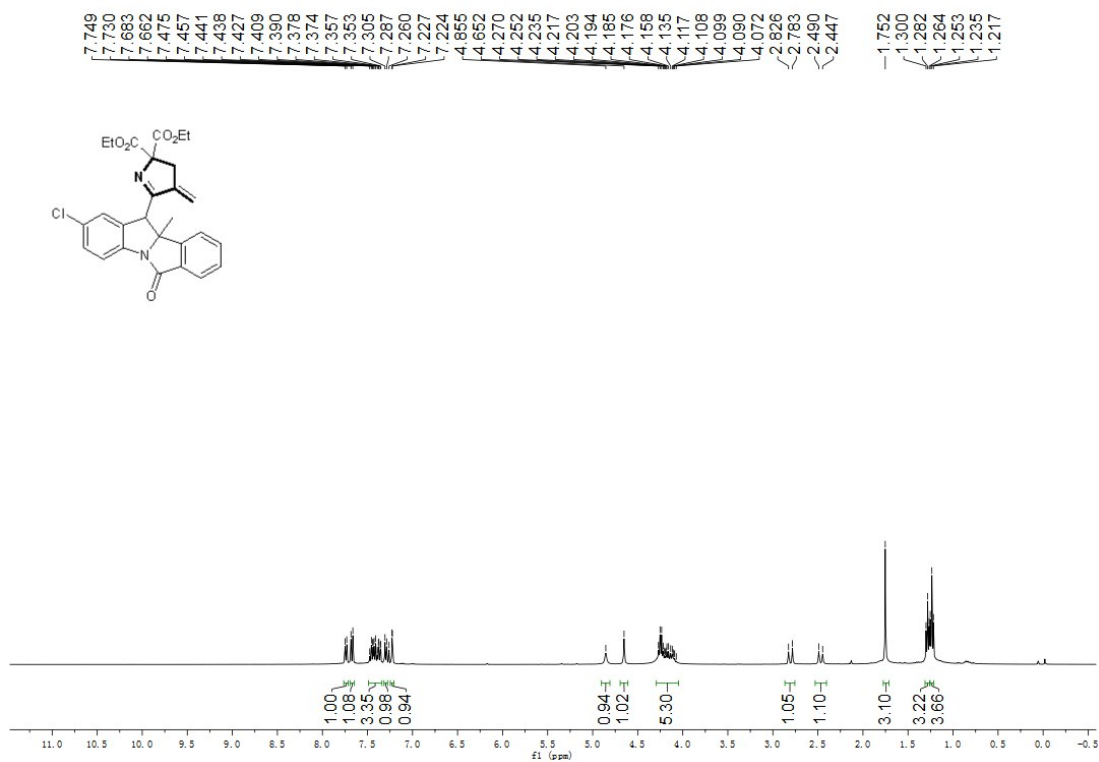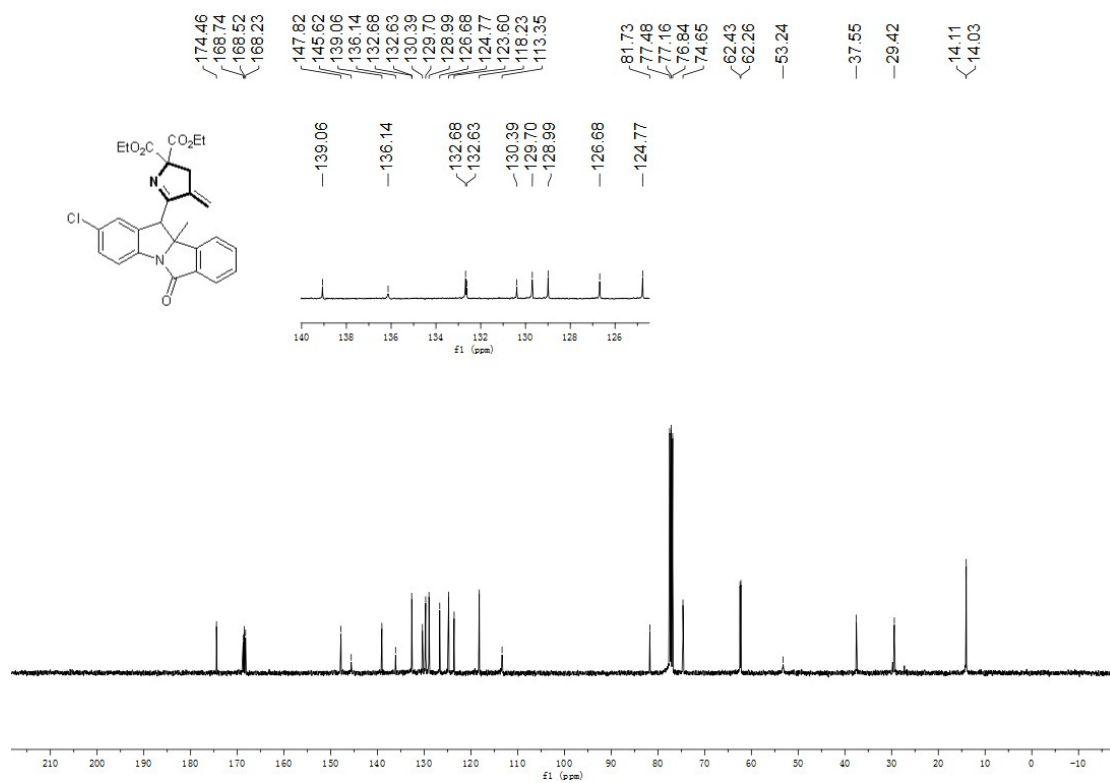

3k

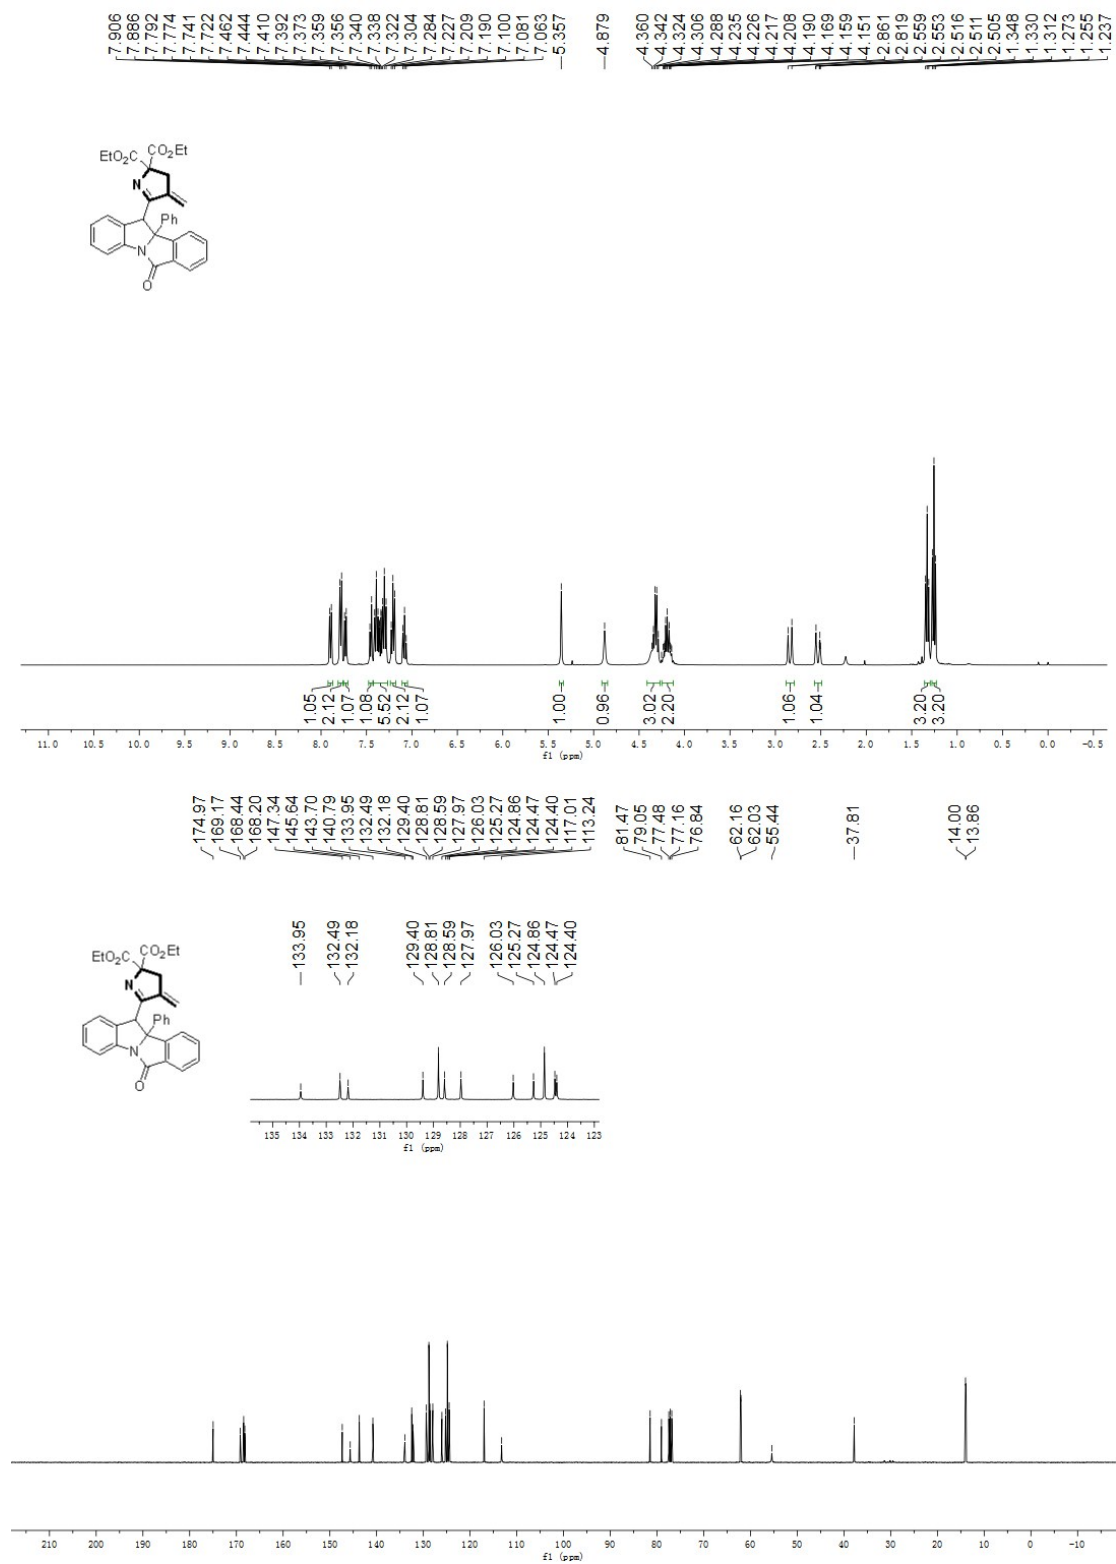

31

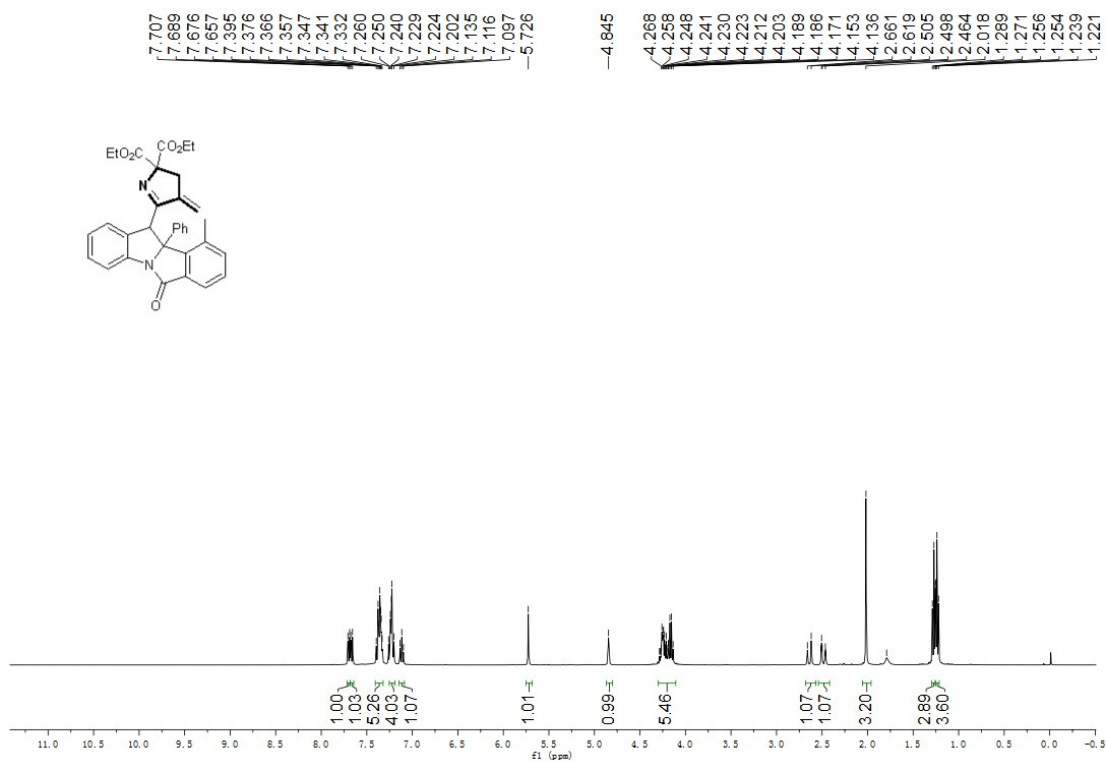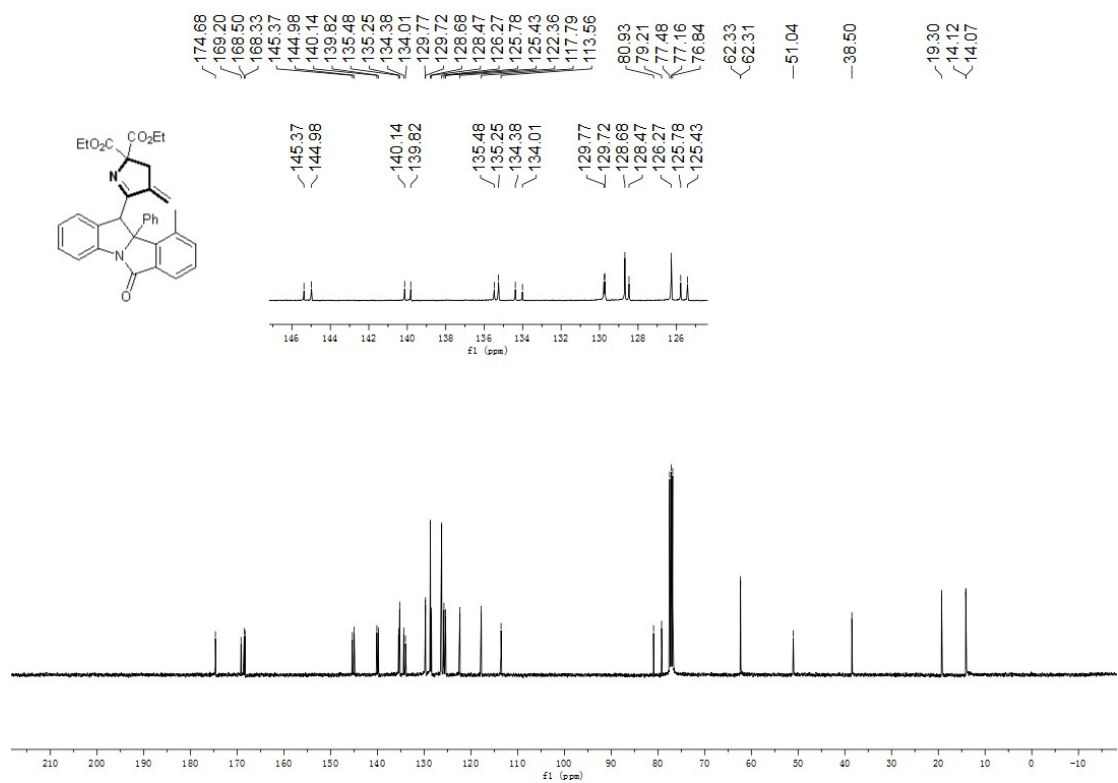

3m

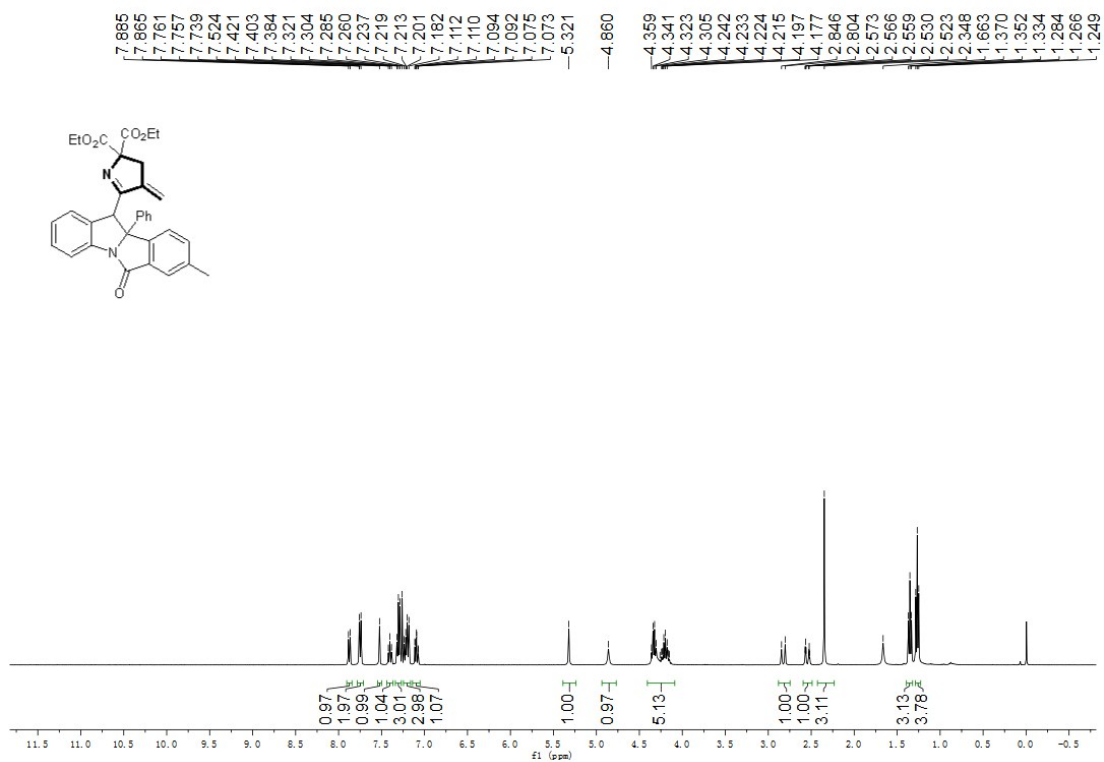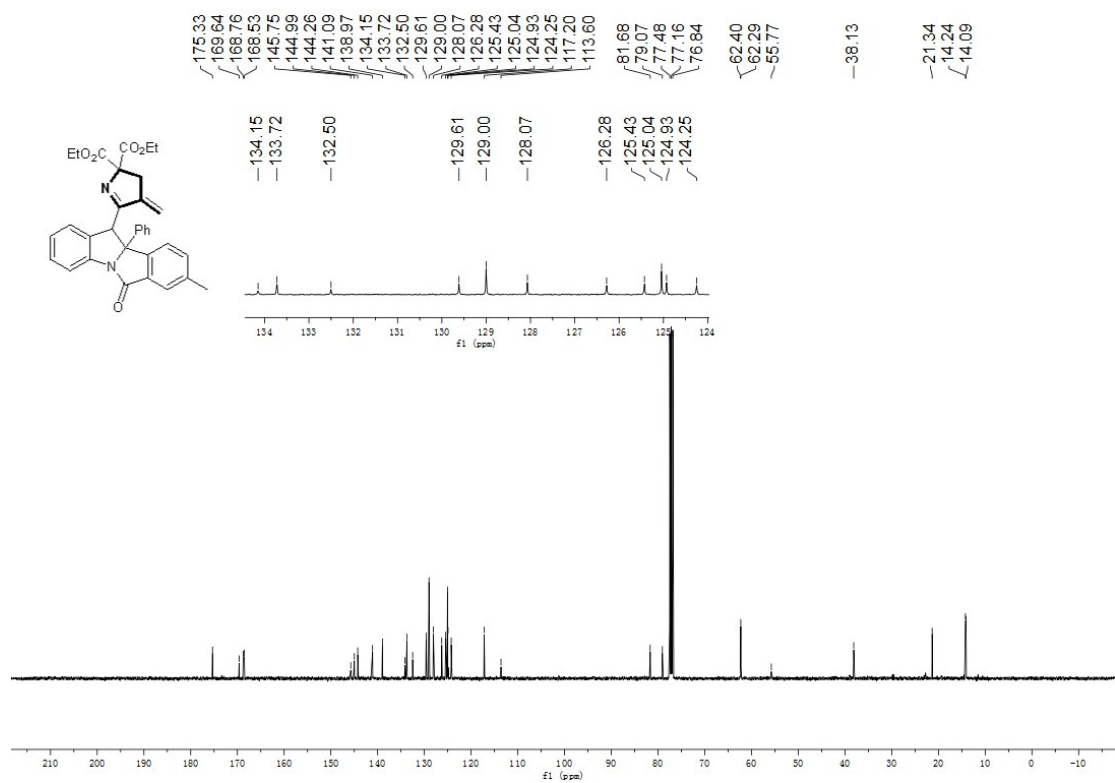



3n

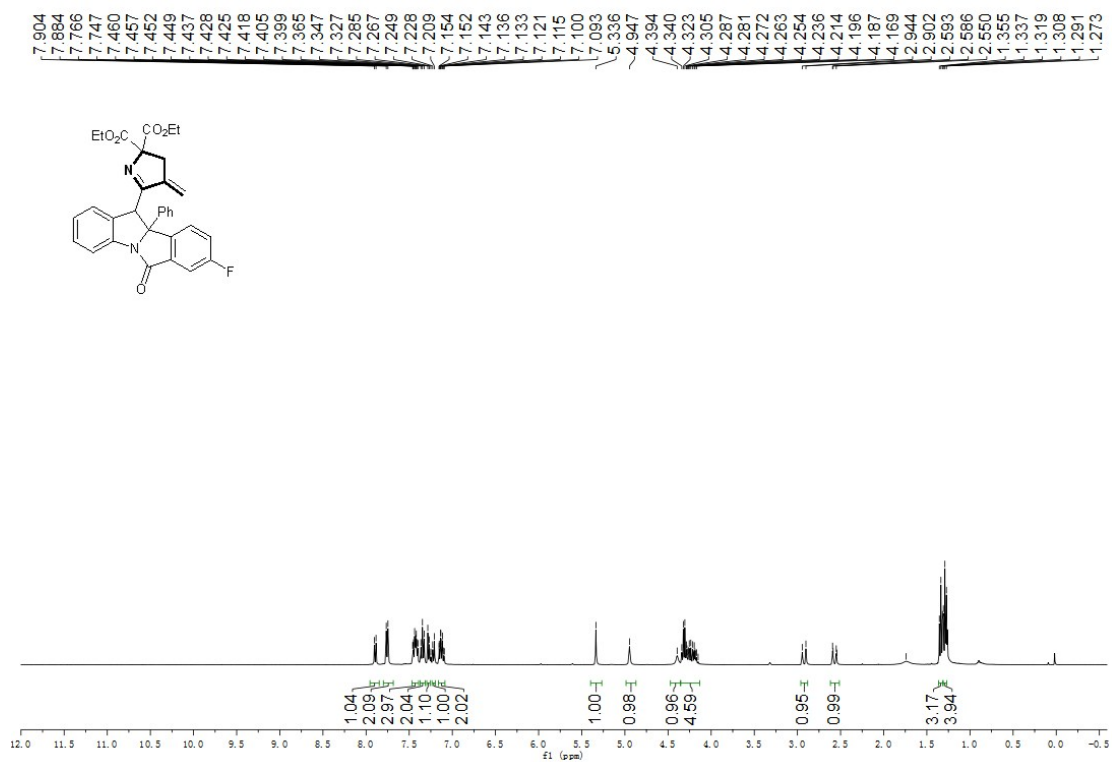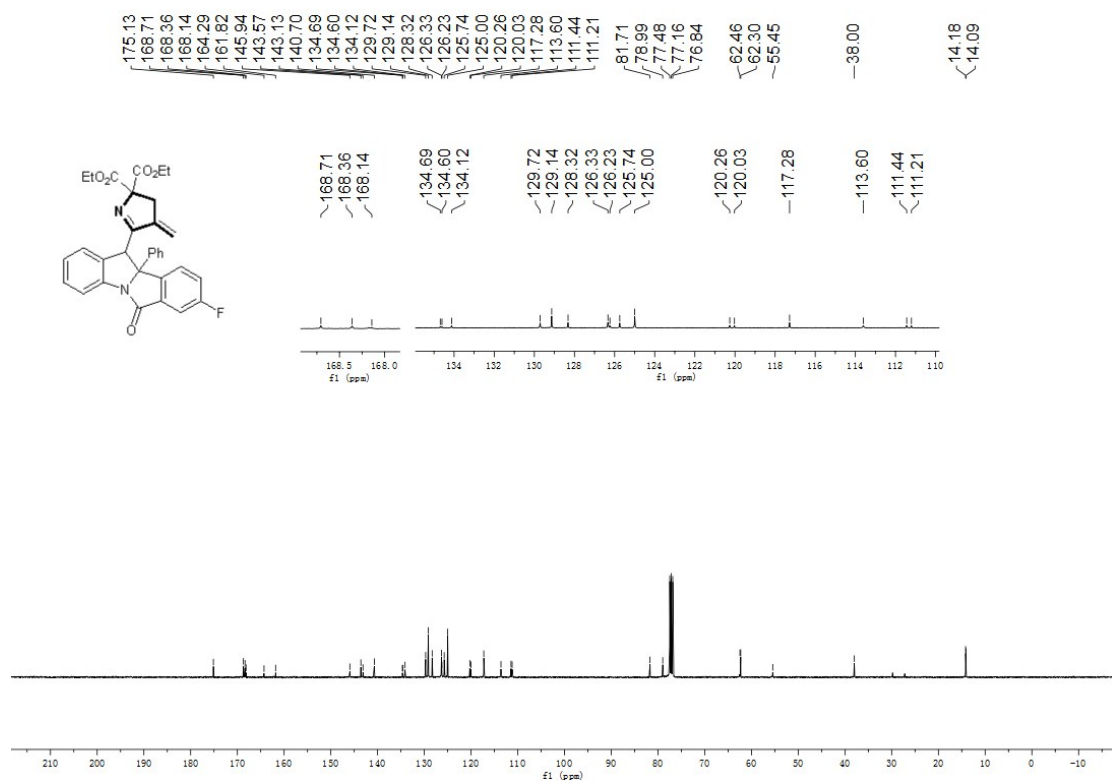

30

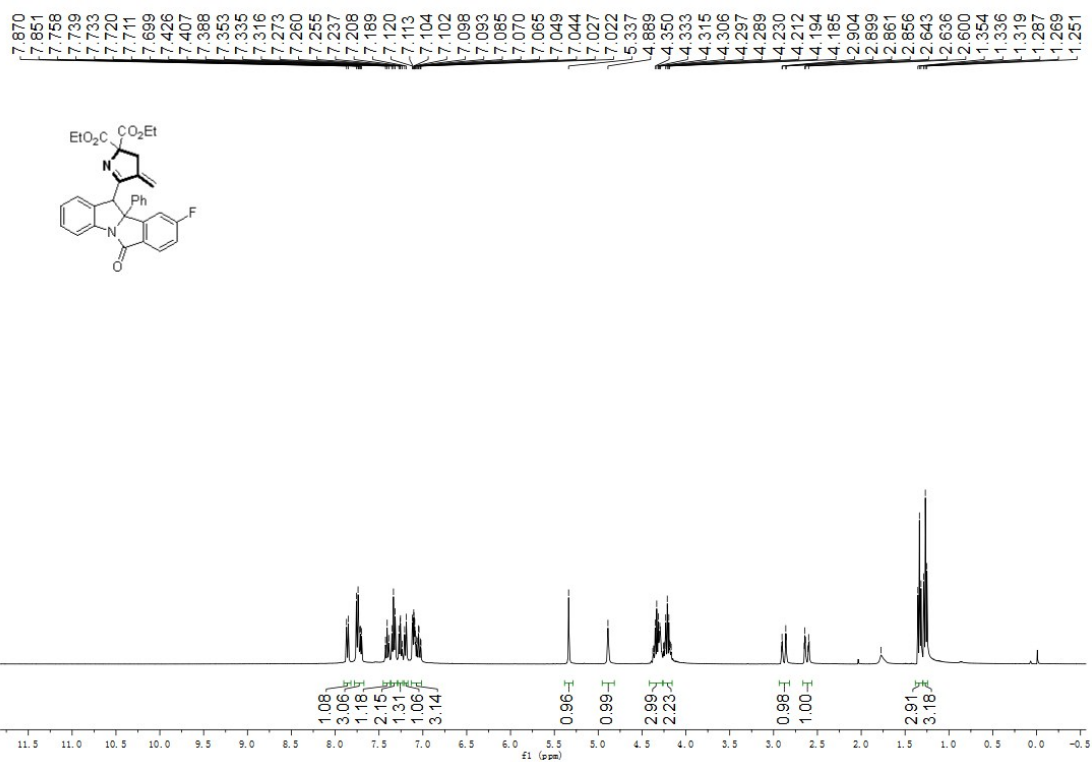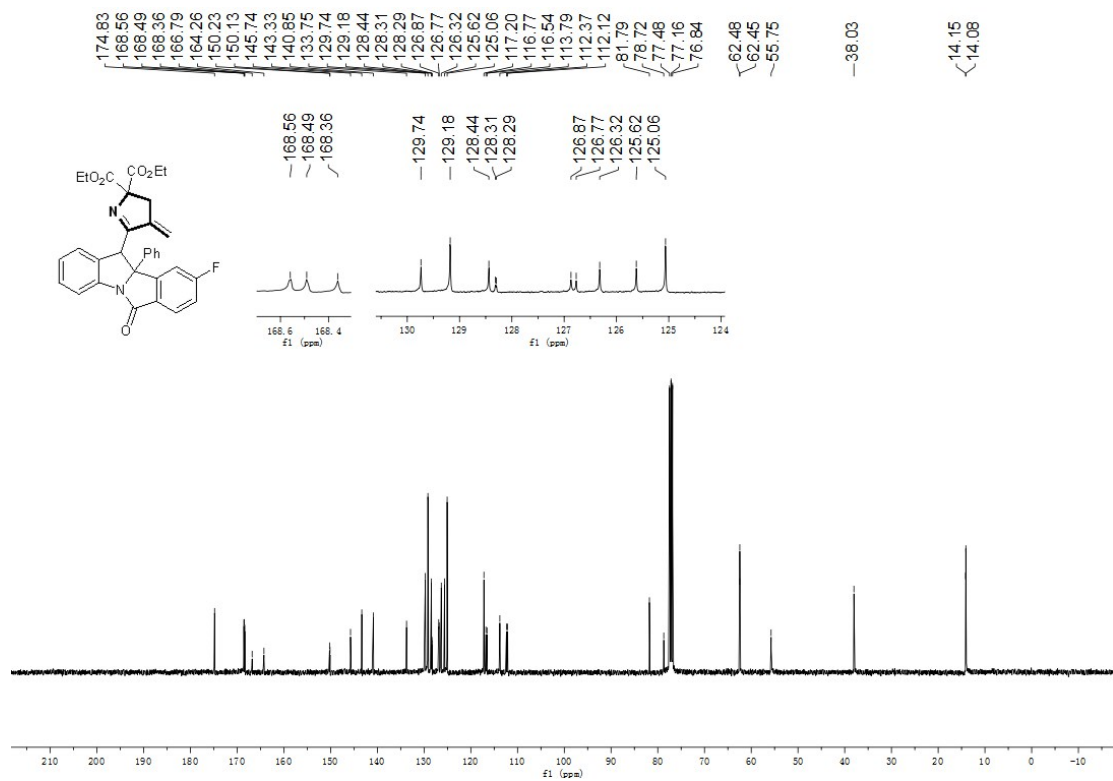

3p

7.897  
7.878  
7.747  
7.728  
7.710  
7.706  
7.444  
7.425  
7.413  
7.406  
7.393  
7.381  
7.377  
7.356  
7.337  
7.317  
7.277  
7.260  
7.242  
7.215  
7.196  
7.144  
7.125  
7.106  
5.317  
4.965  
4.433  
4.324  
4.307  
4.289  
4.272  
4.265  
4.256  
4.246  
4.238  
4.229  
4.216  
4.211  
4.198  
4.180  
4.171  
4.163  
4.154  
4.142  
2.956  
2.914  
2.612  
2.605  
2.598  
2.589  
2.563  
2.566  
1.339  
1.321  
1.302  
1.284  
1.266  
1.257

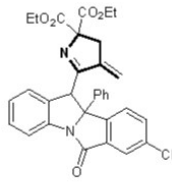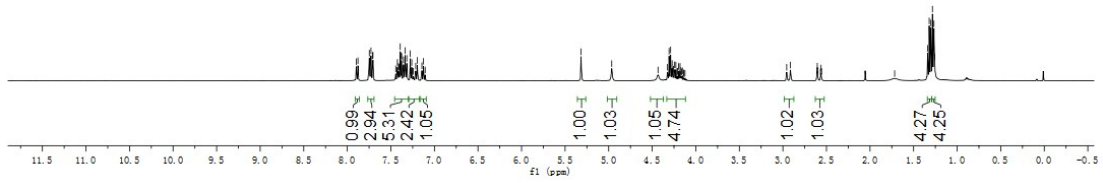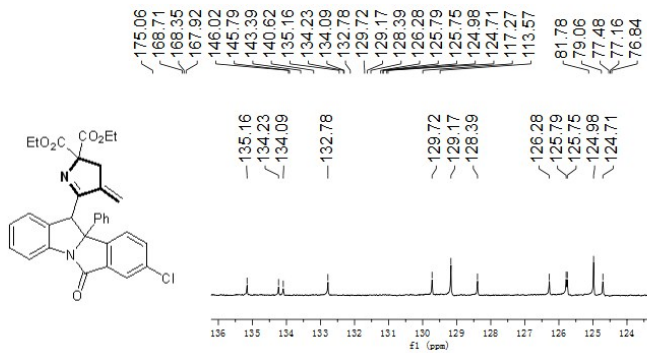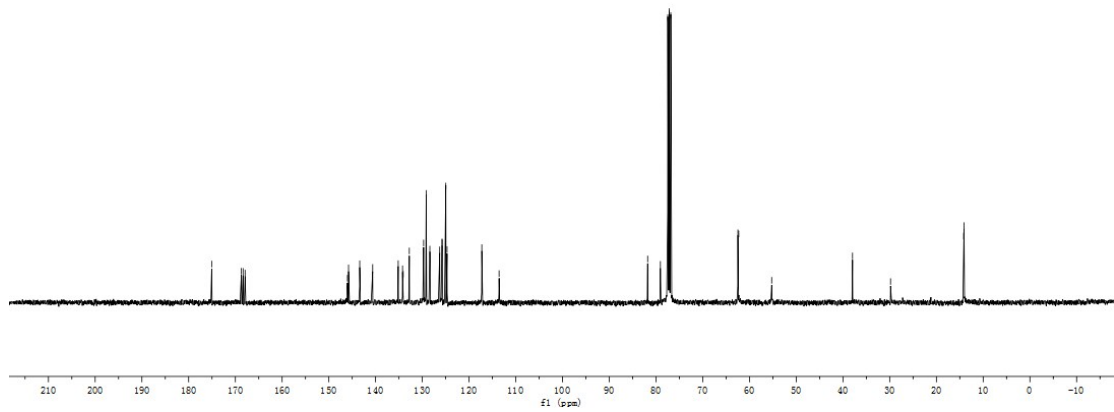

3q

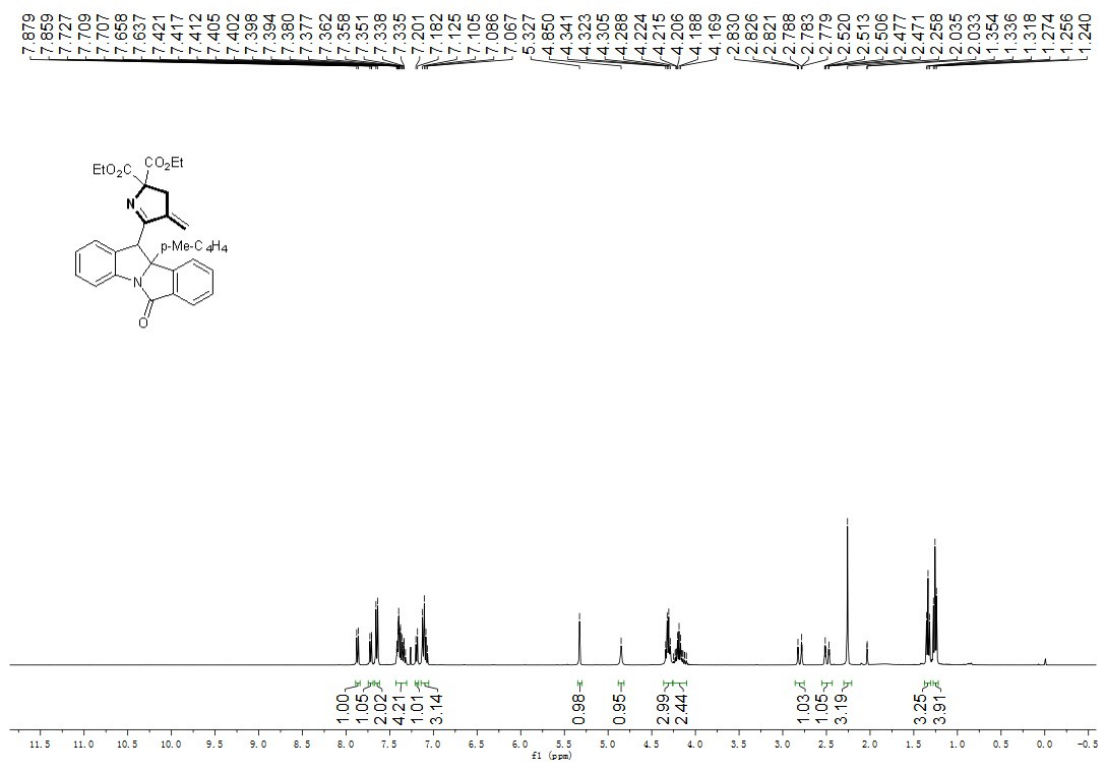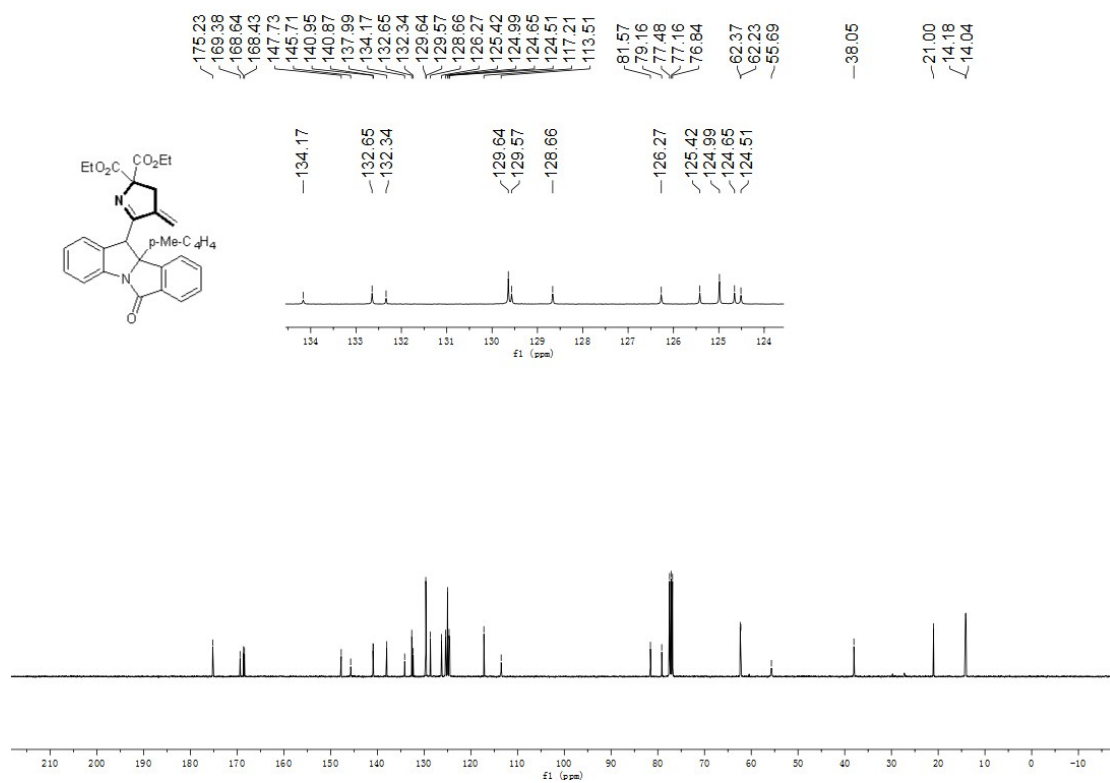

3r

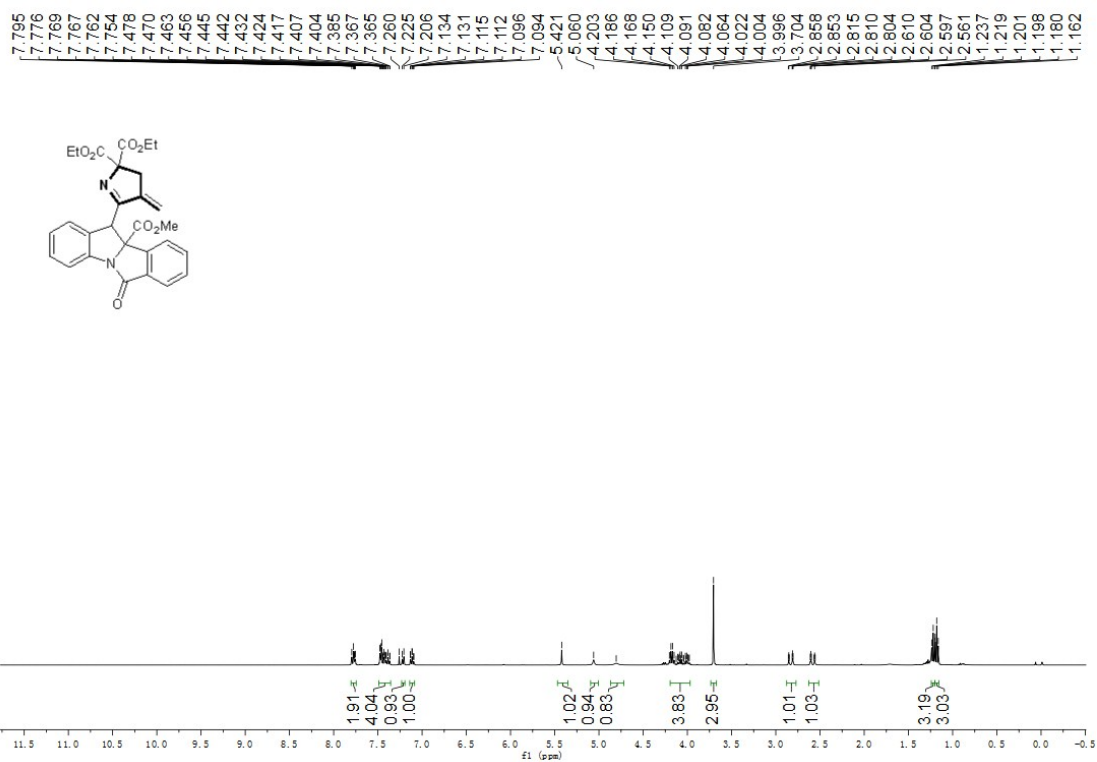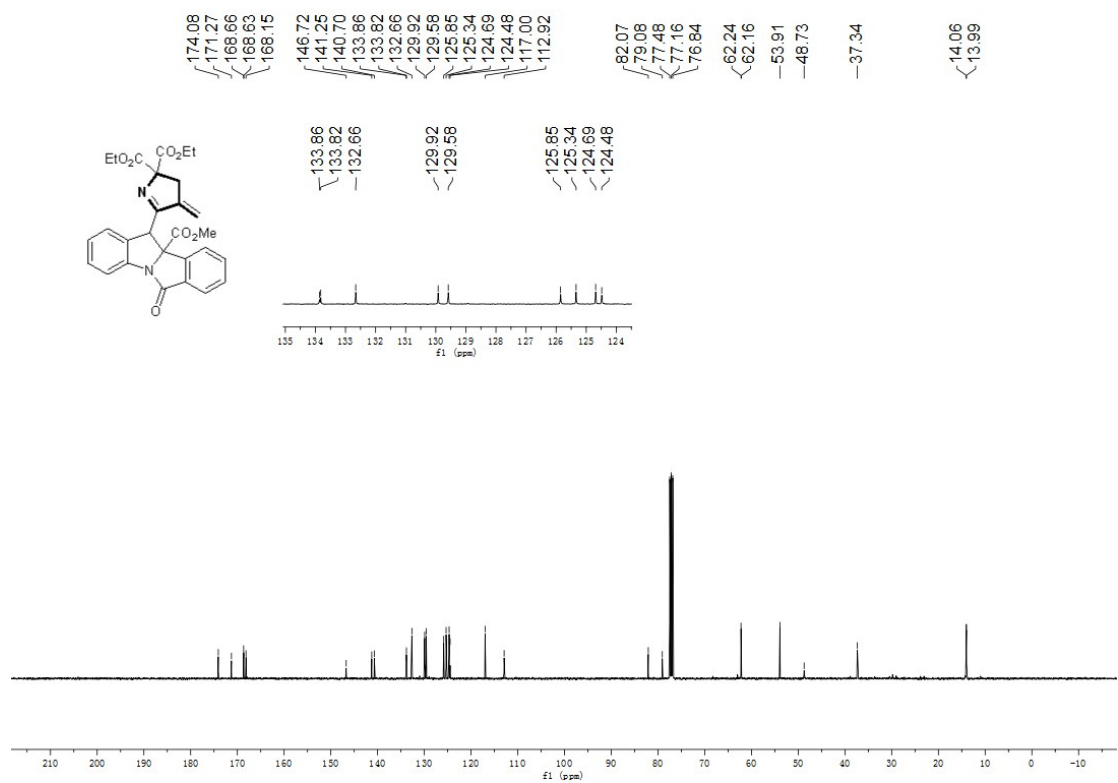

3s

7.890  
7.871  
7.761  
7.743  
7.452  
7.445  
7.442  
7.439  
7.434  
7.427  
7.425  
7.407  
7.389  
7.381  
7.376  
7.372  
7.363  
7.359  
7.355  
7.348  
7.344  
7.338  
7.335  
7.320  
7.317  
7.301  
7.298  
7.260  
7.249  
7.231  
7.142  
7.125  
7.104  
7.102  
7.097  
7.095  
7.086  
7.063  
7.078  
7.076  
5.212  
5.201  
5.056  
5.052  
4.994  
4.963  
4.931  
4.202  
4.184  
4.089  
4.052  
2.678  
1.288  
1.270  
1.254  
1.255  
1.218  
1.200

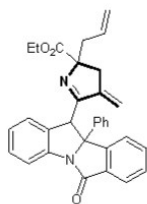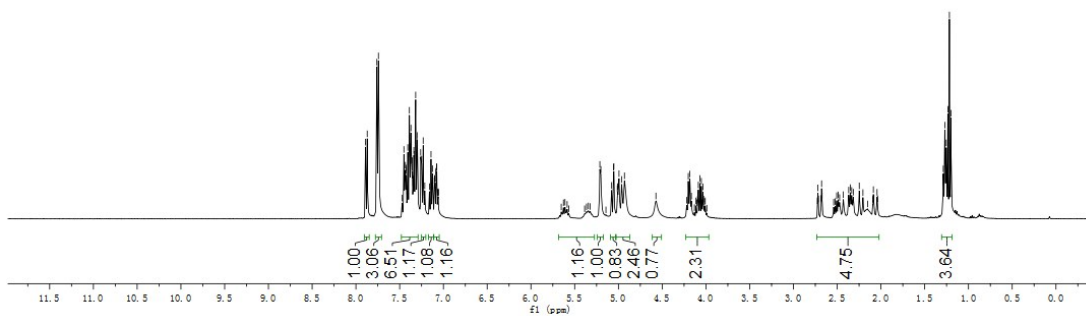

172.75  
172.52  
172.30  
172.24  
169.33  
169.17  
147.68  
147.46  
143.92  
143.82  
140.86  
140.74  
140.74  
135.33  
132.83  
132.77  
132.71  
132.44  
132.35  
132.28  
129.38  
129.35  
129.04  
129.02  
128.73  
128.14  
128.13  
125.98  
125.87  
125.31  
125.11  
125.09  
124.81  
124.71  
124.42  
119.23  
119.09  
117.31  
117.23  
111.60  
111.60  
79.48  
79.43  
78.47  
77.92  
77.48  
77.16  
76.84  
61.45  
61.37  
54.46  
42.98  
42.42  
38.94  
38.49  
14.35  
14.22

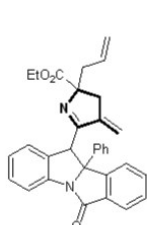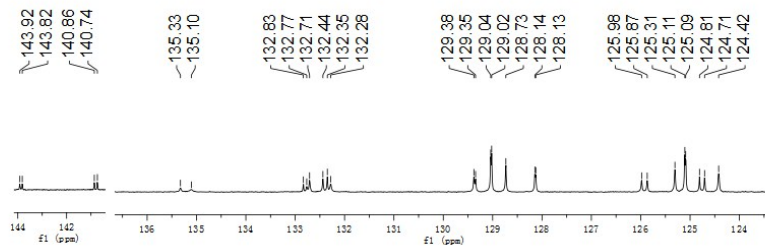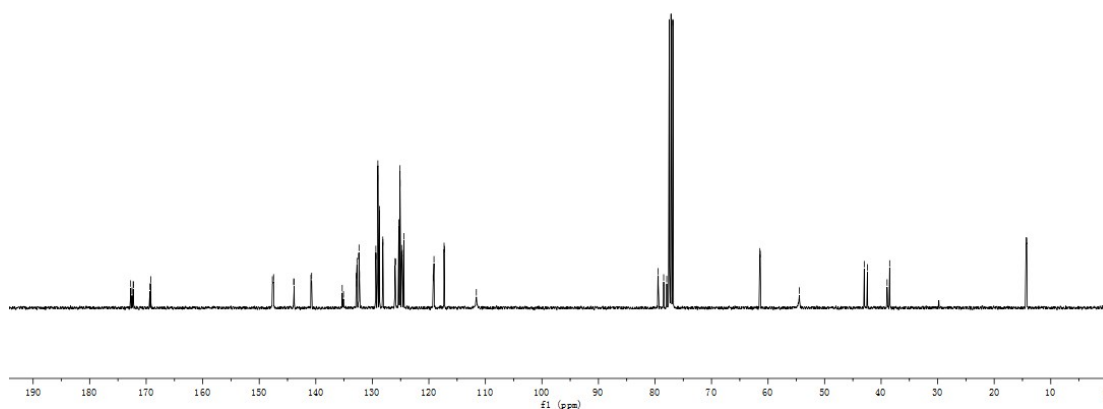

3t

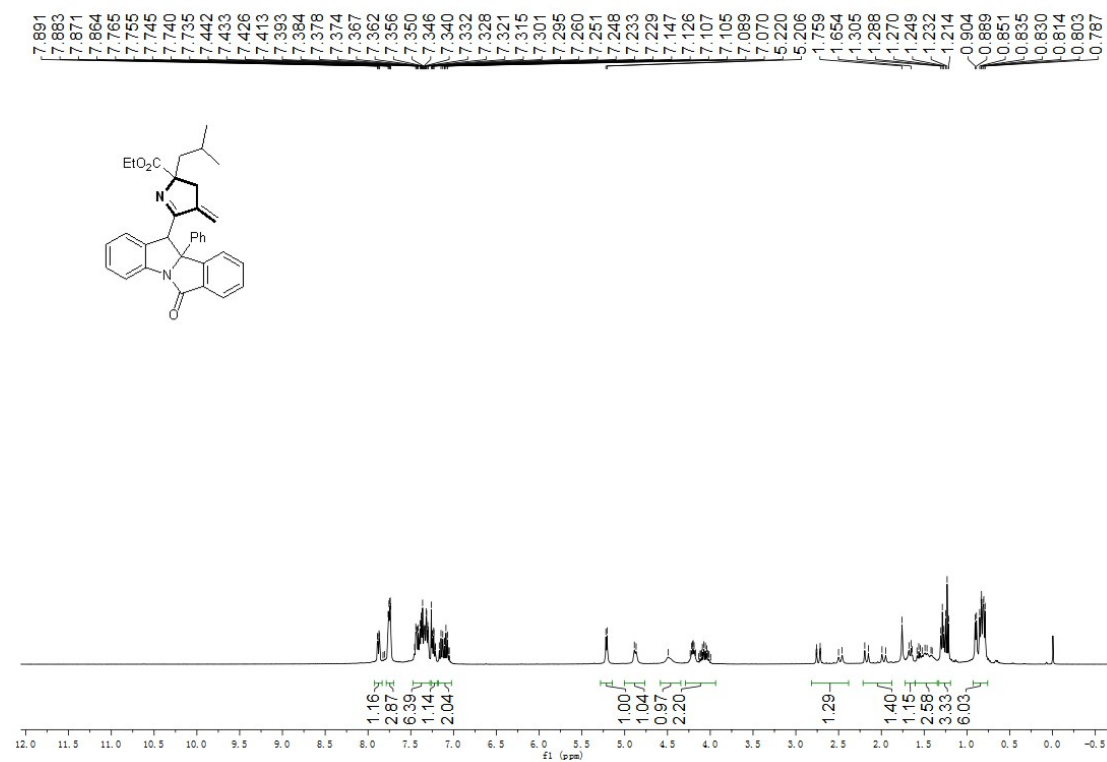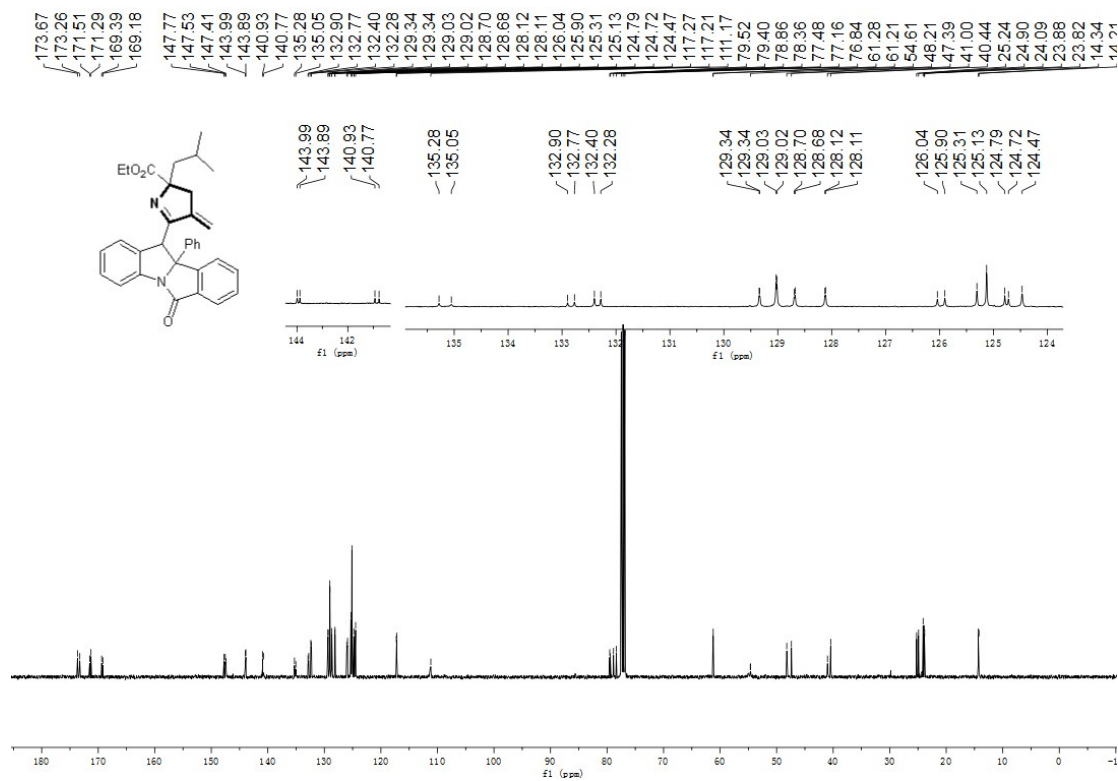

5a

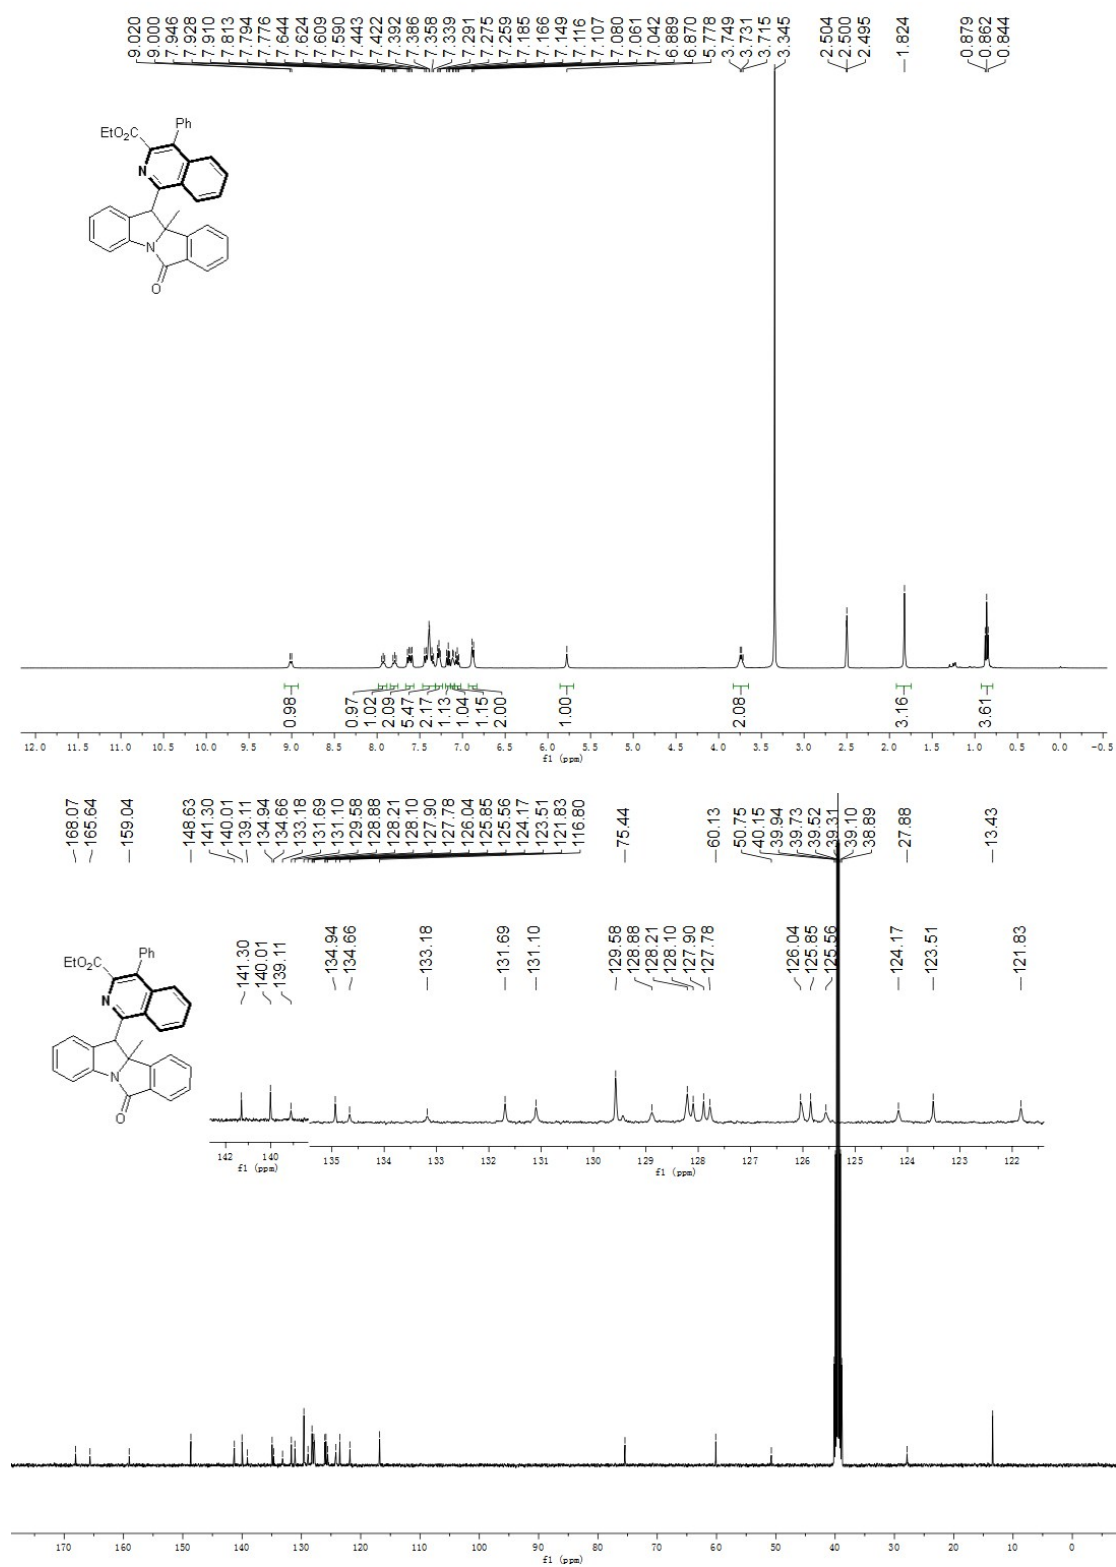



5b

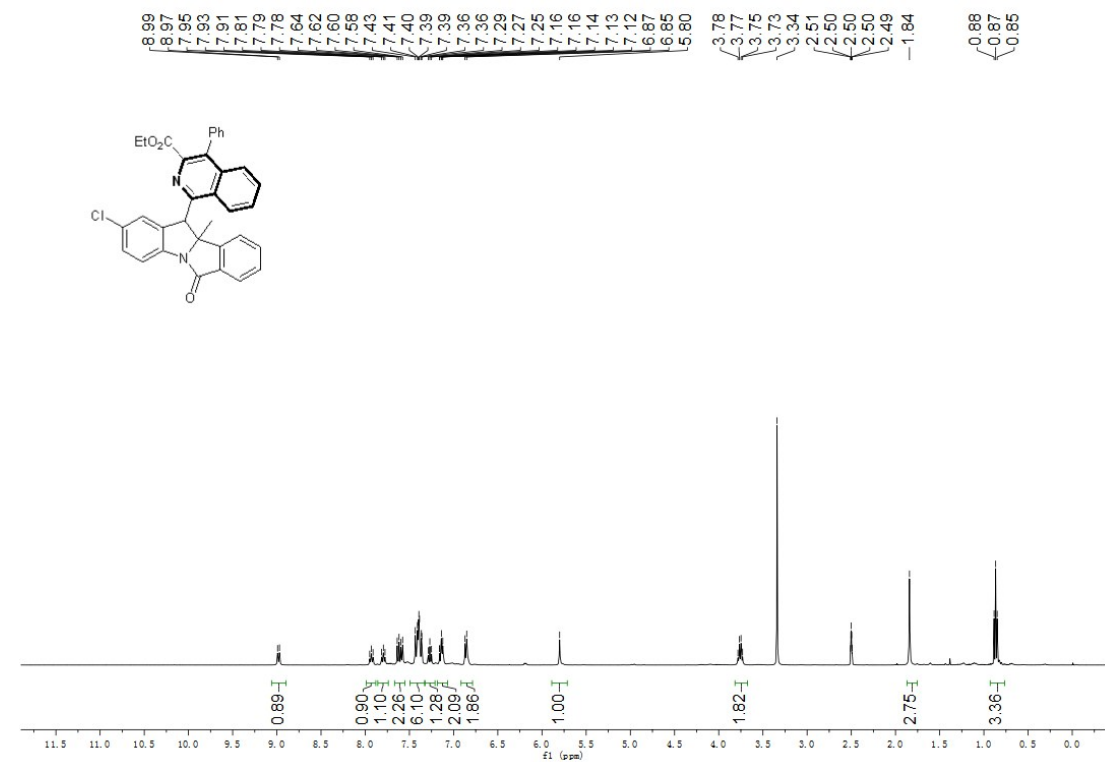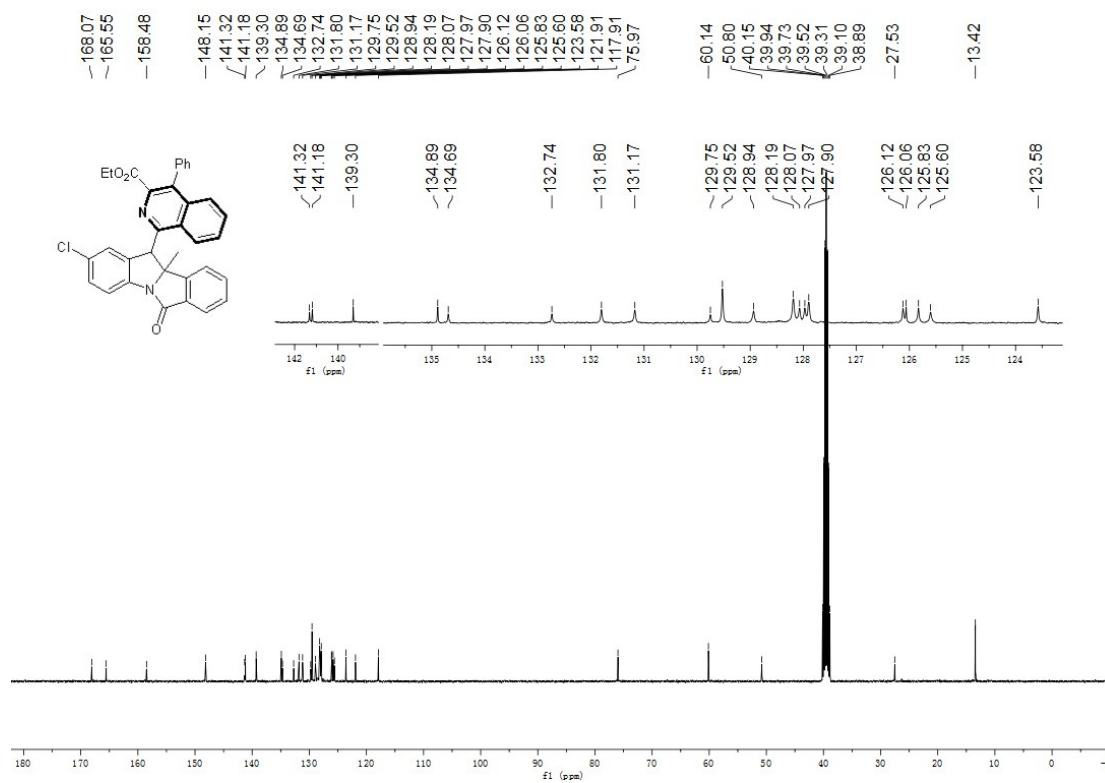

5c

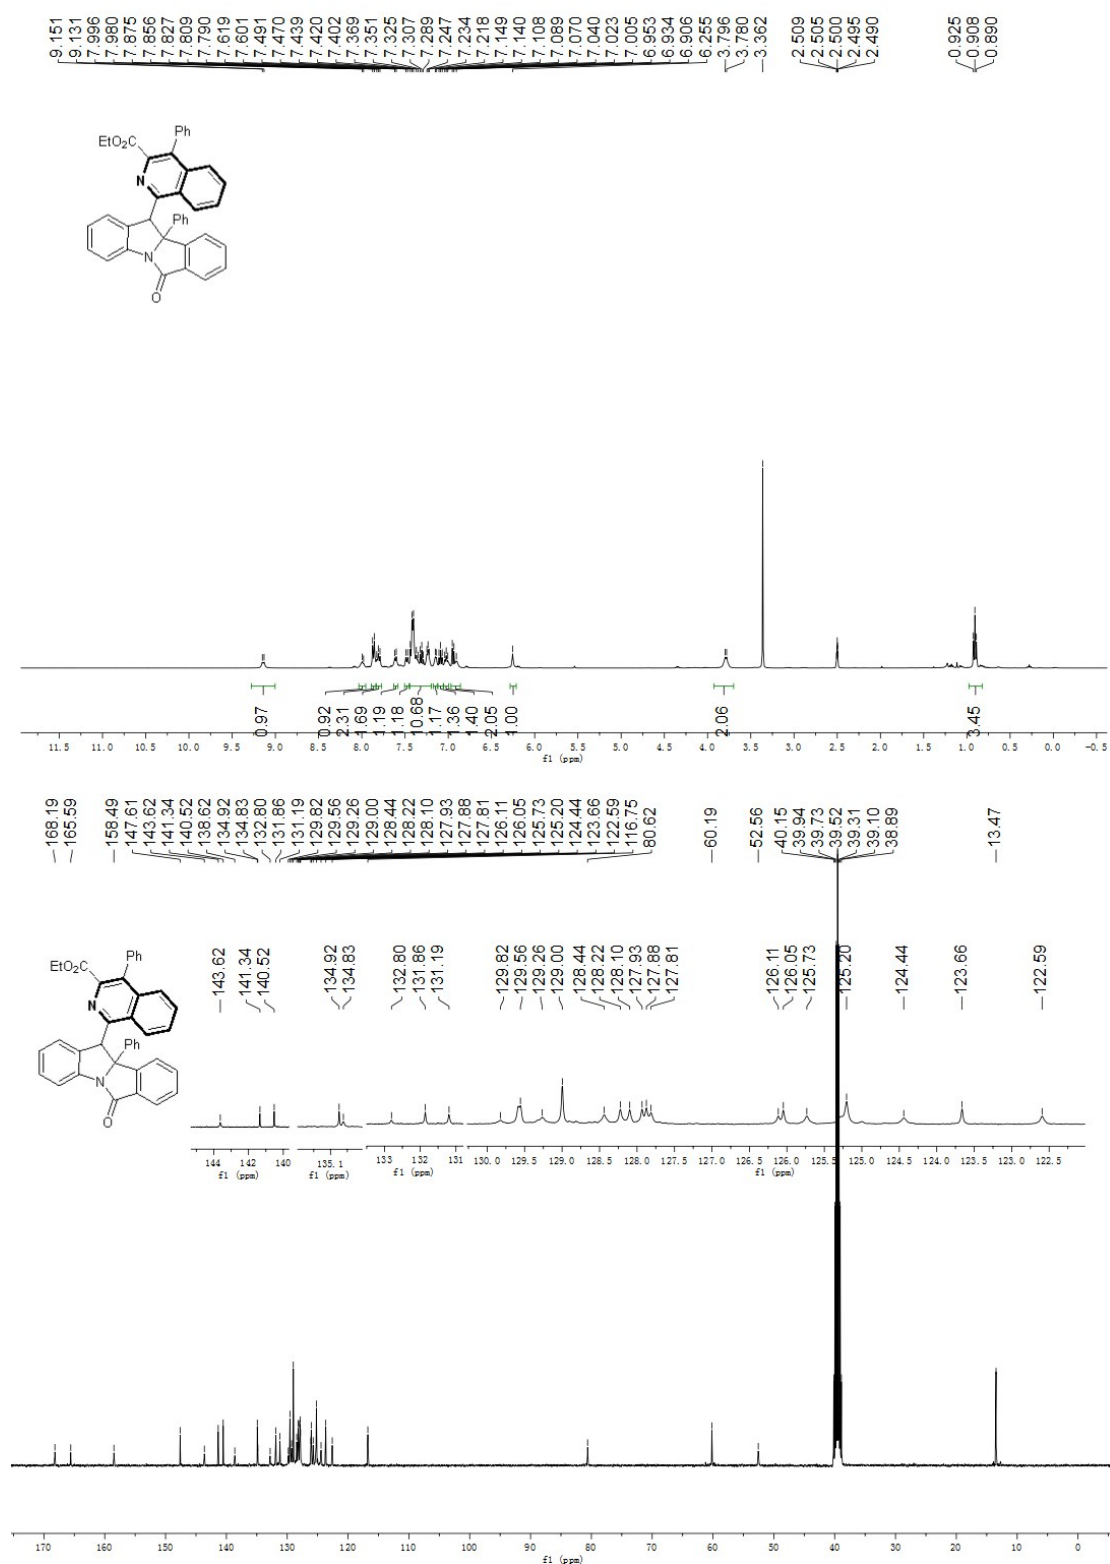

5d

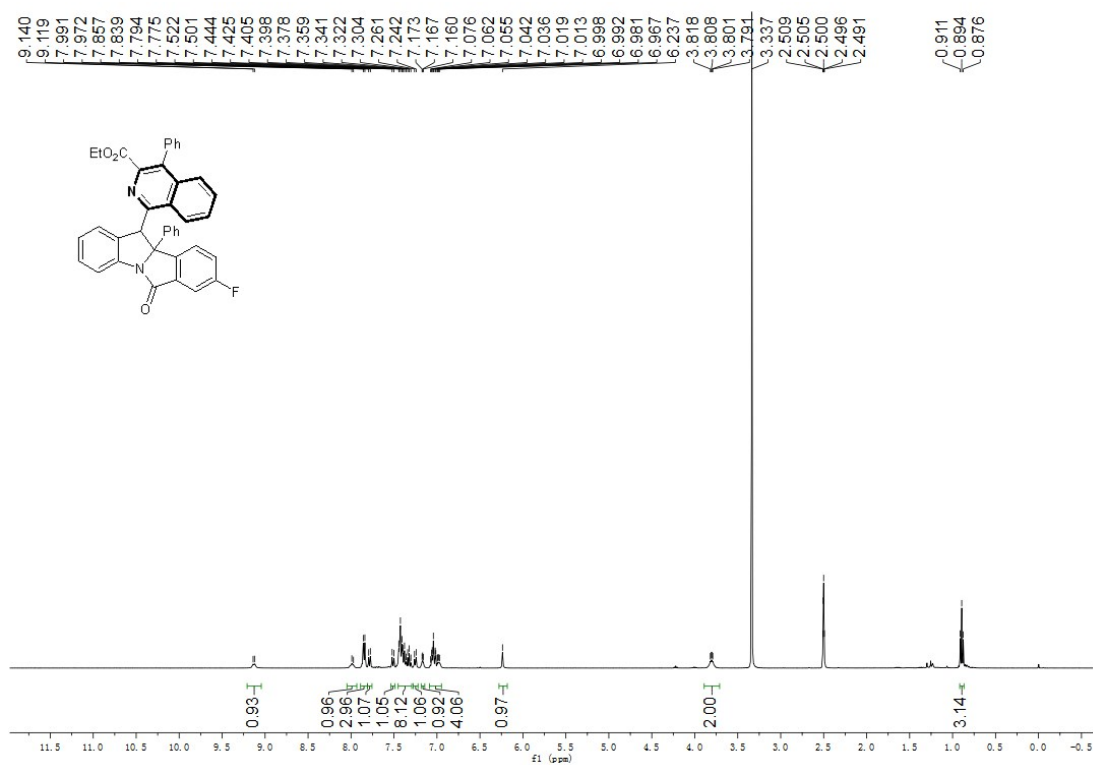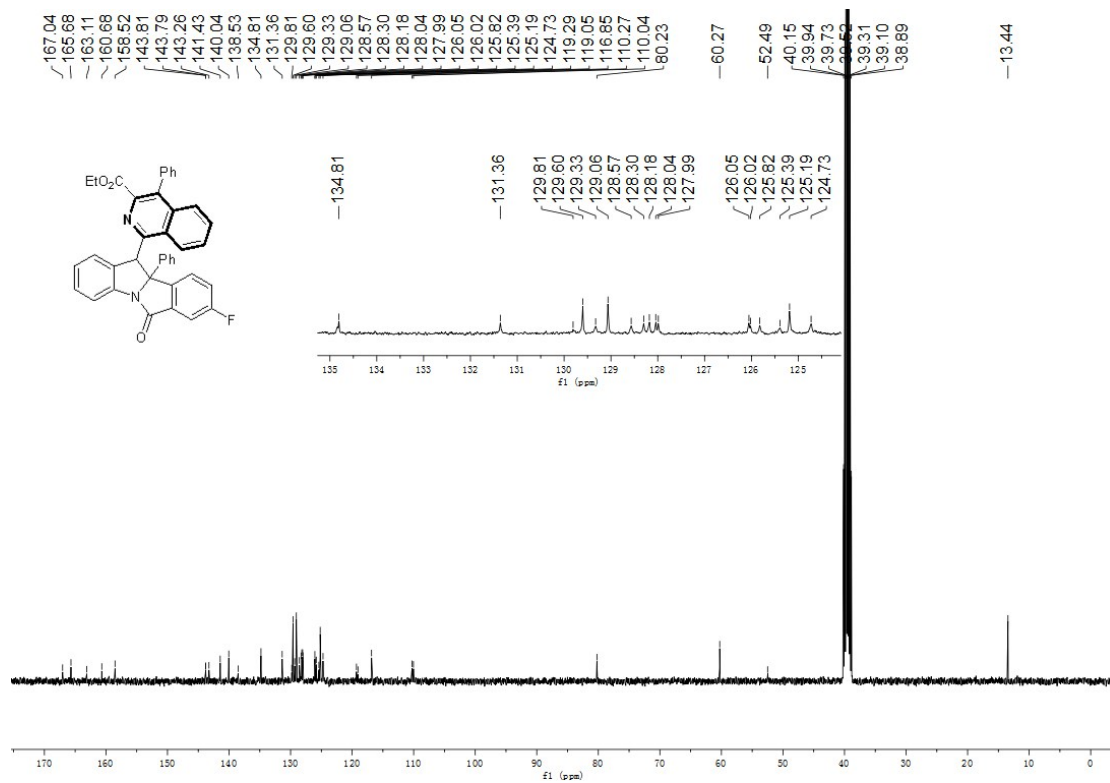

5e

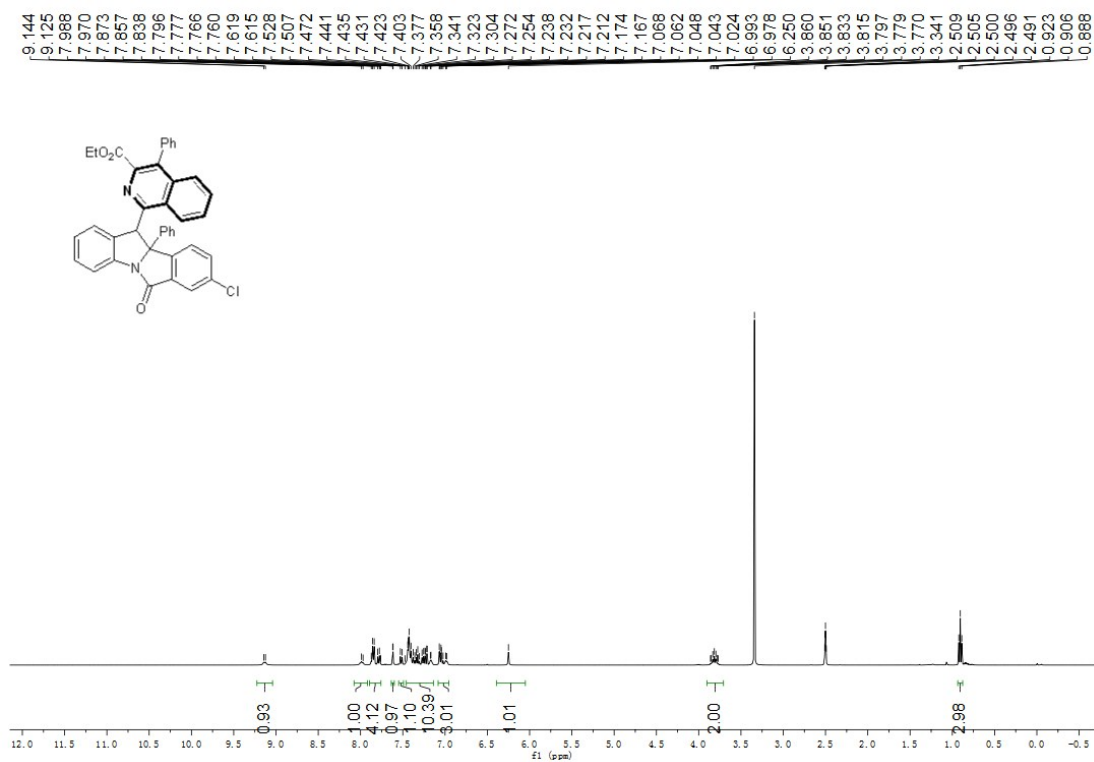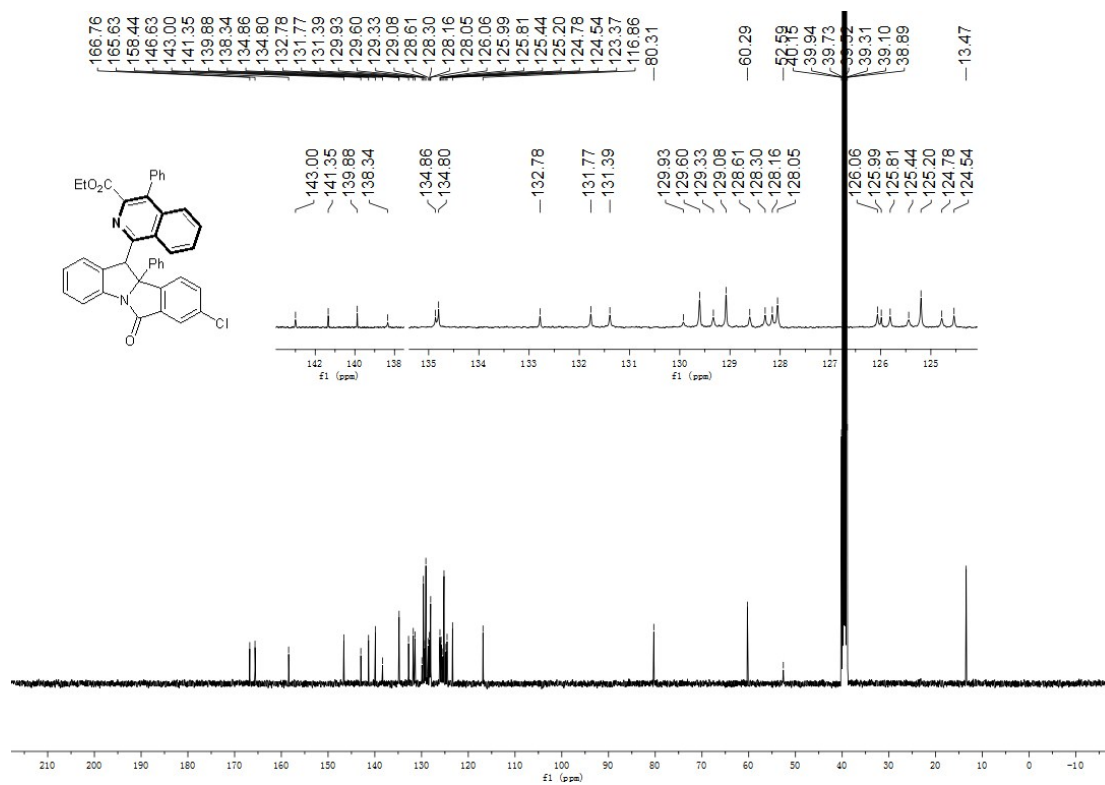

5f

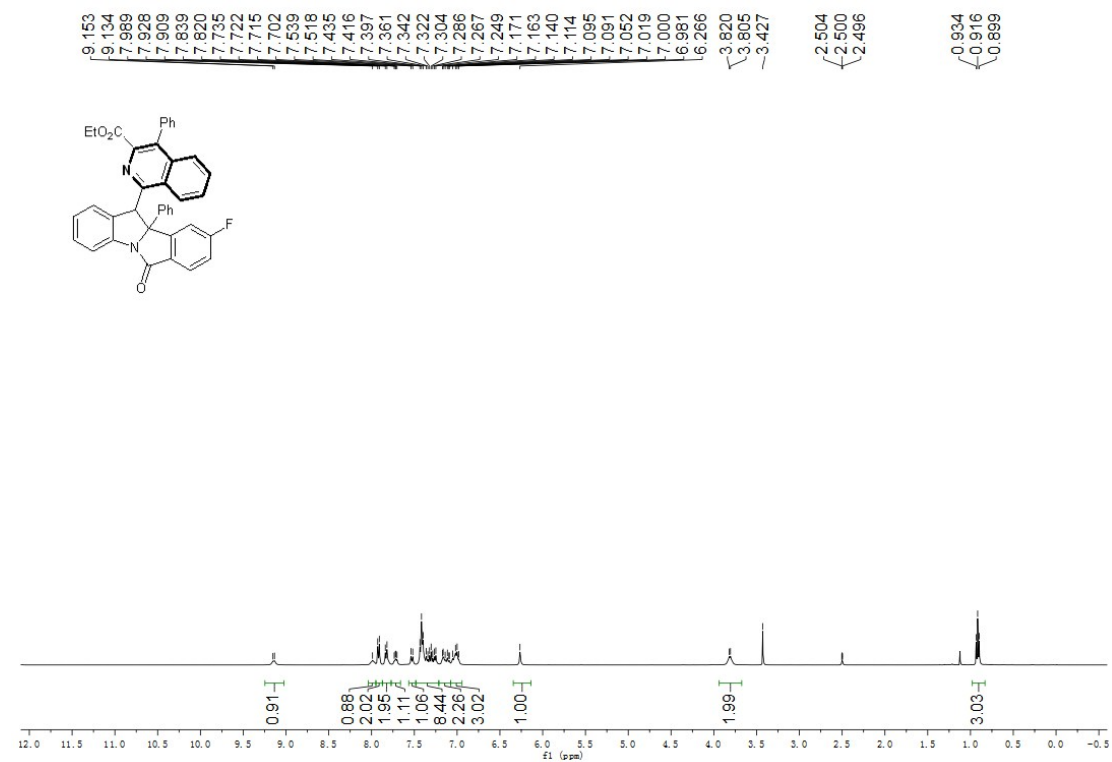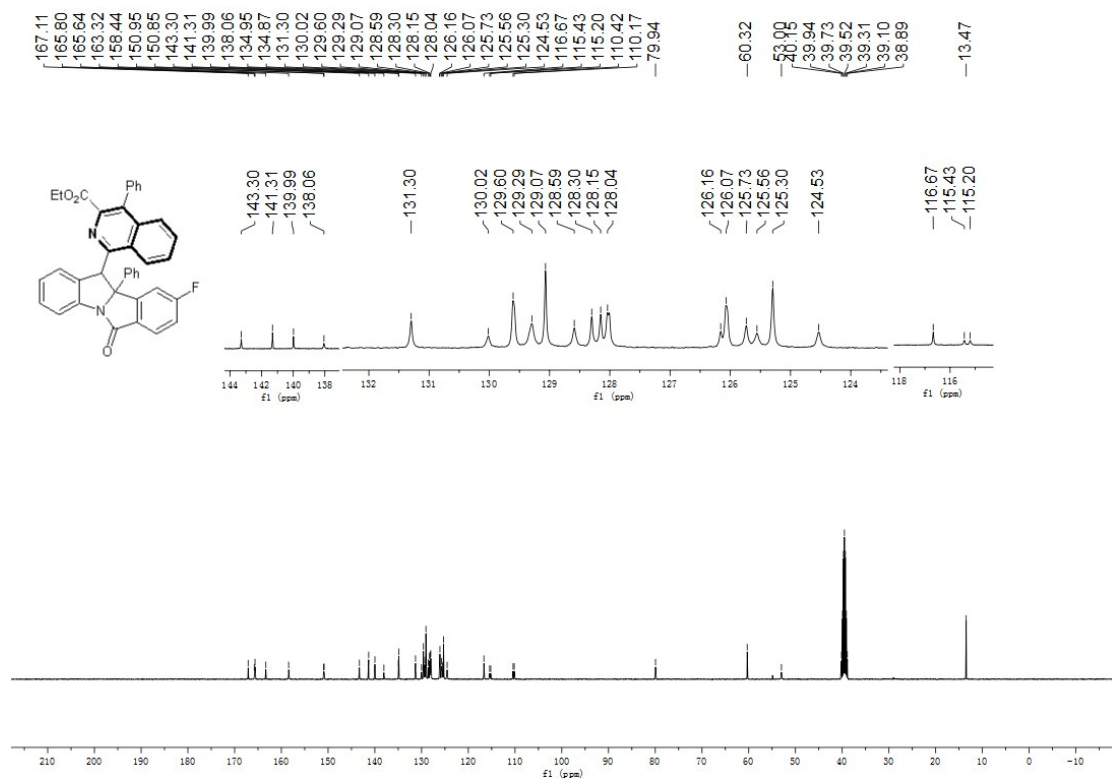

5g

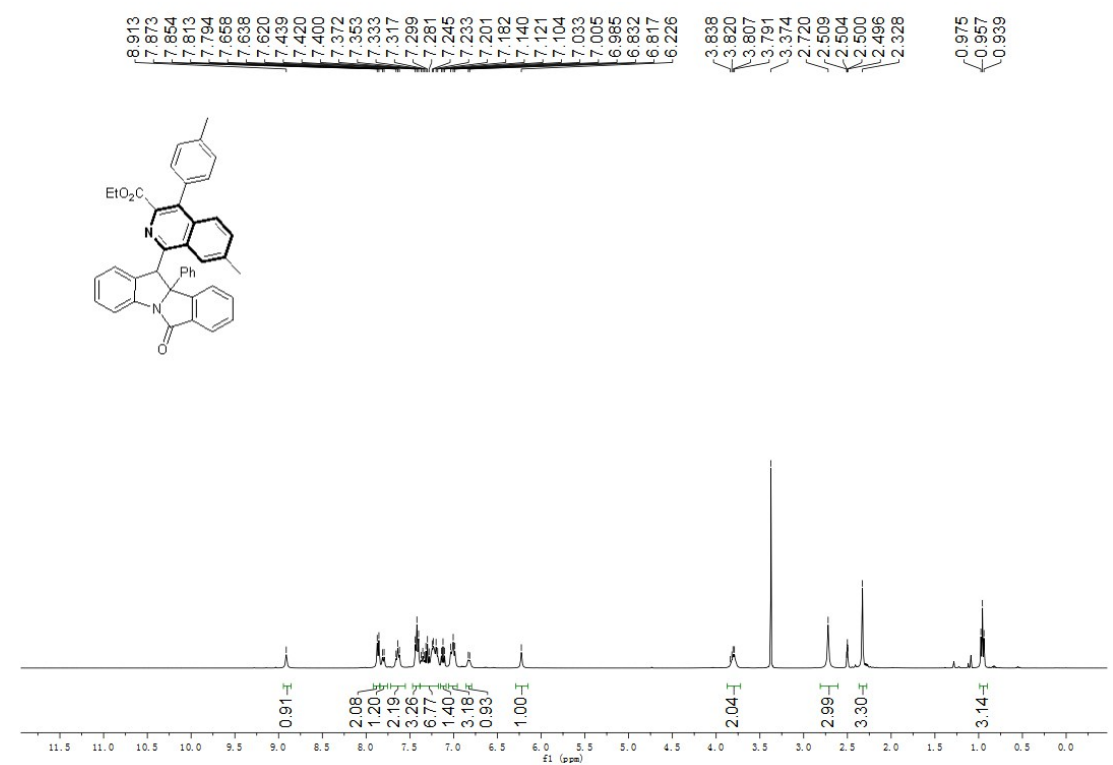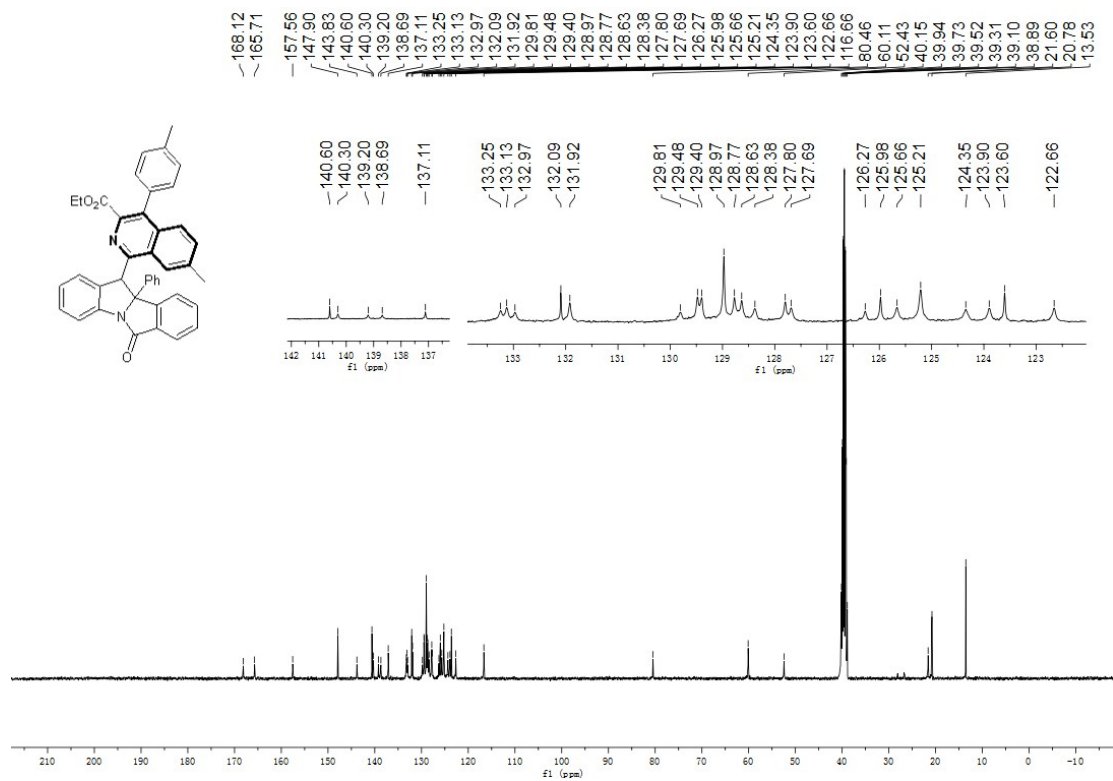

5h

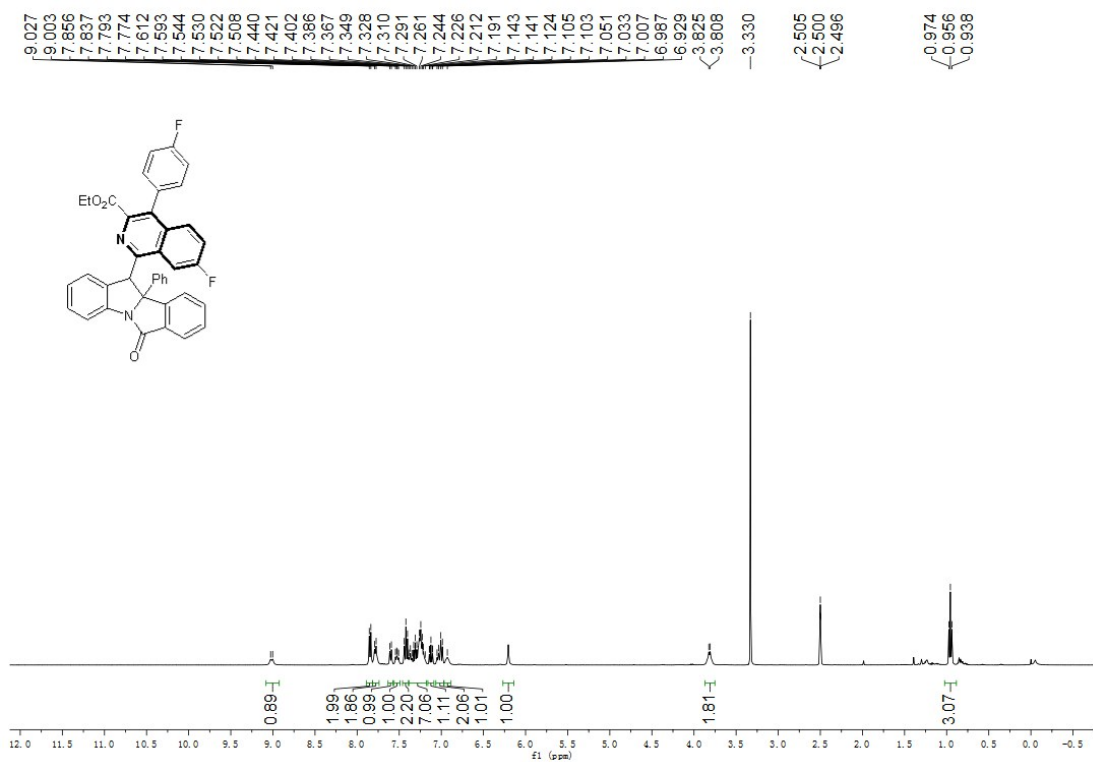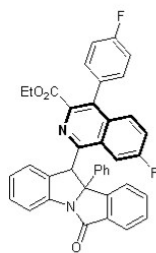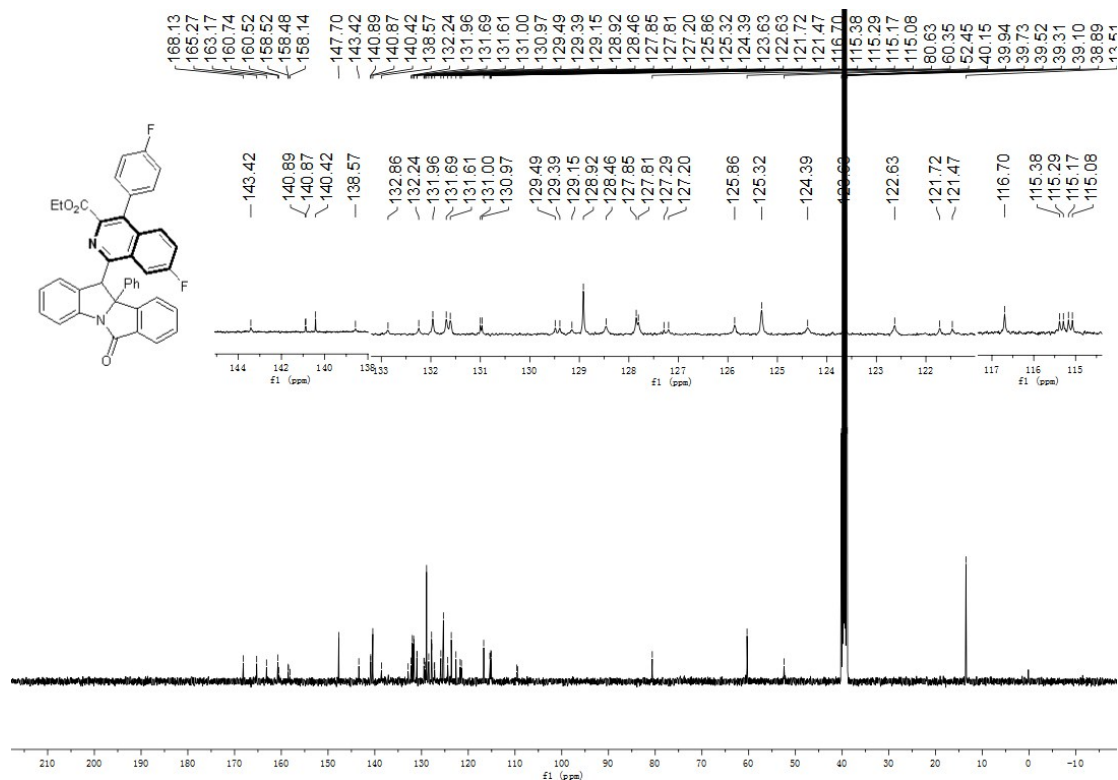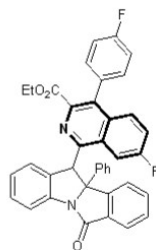

5i

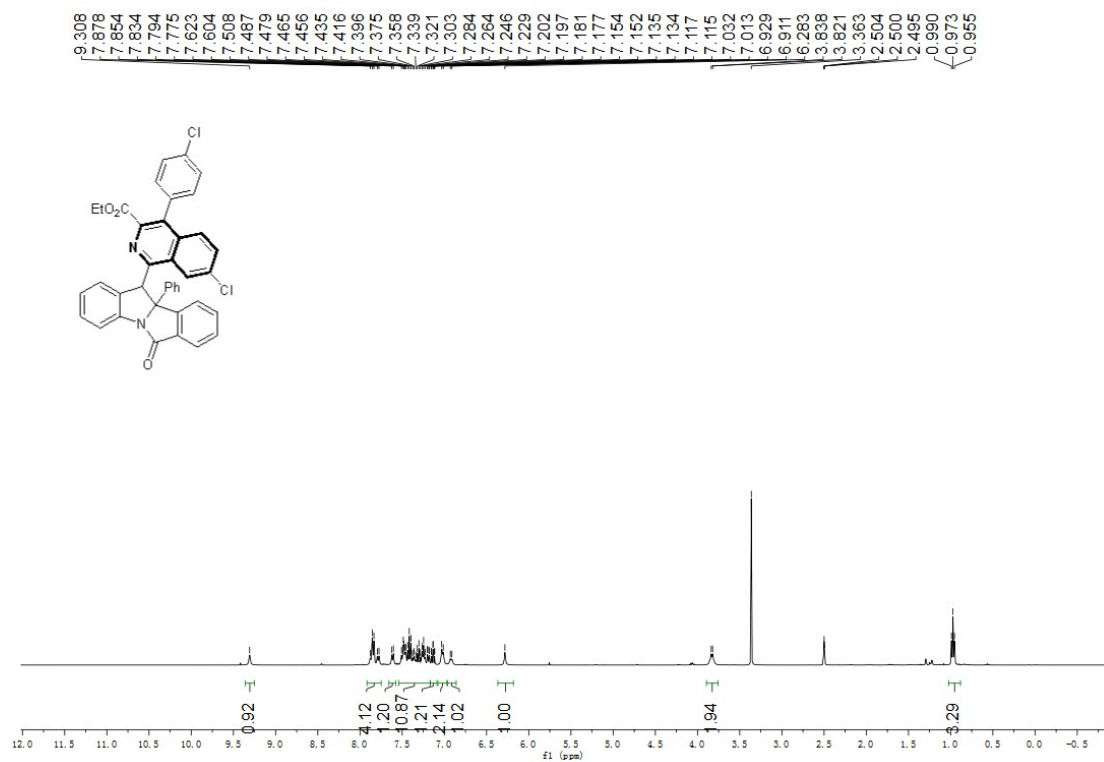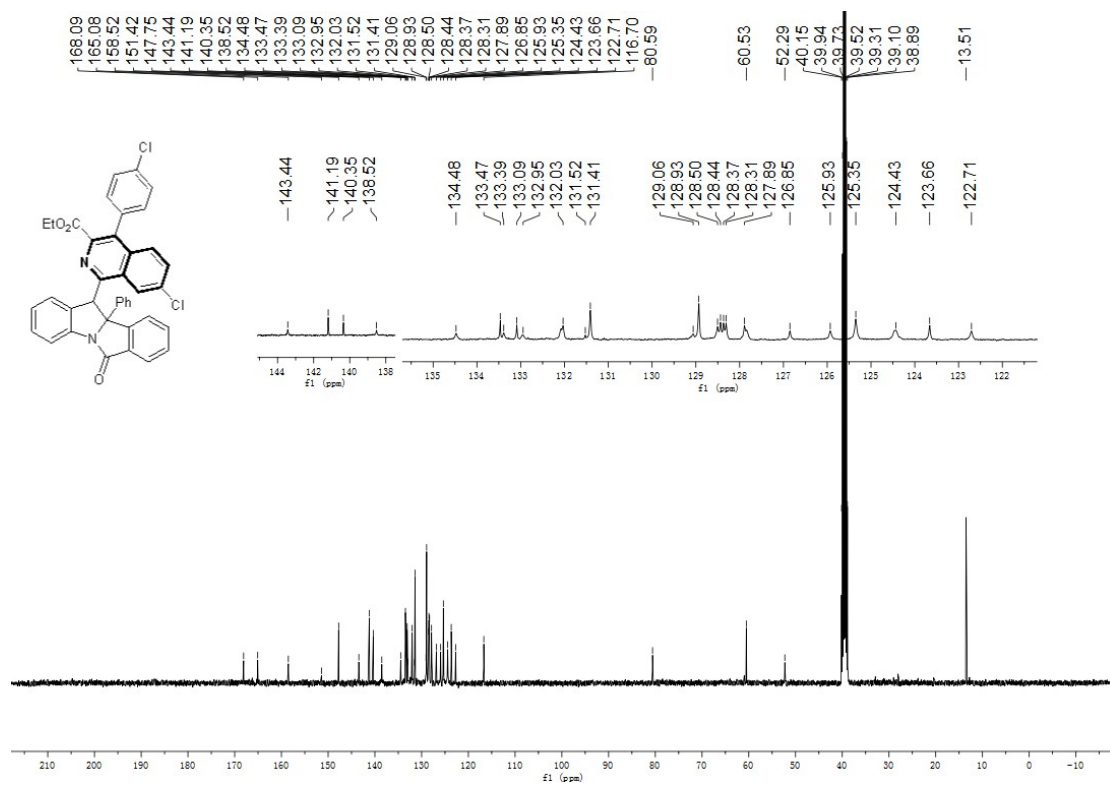



5j

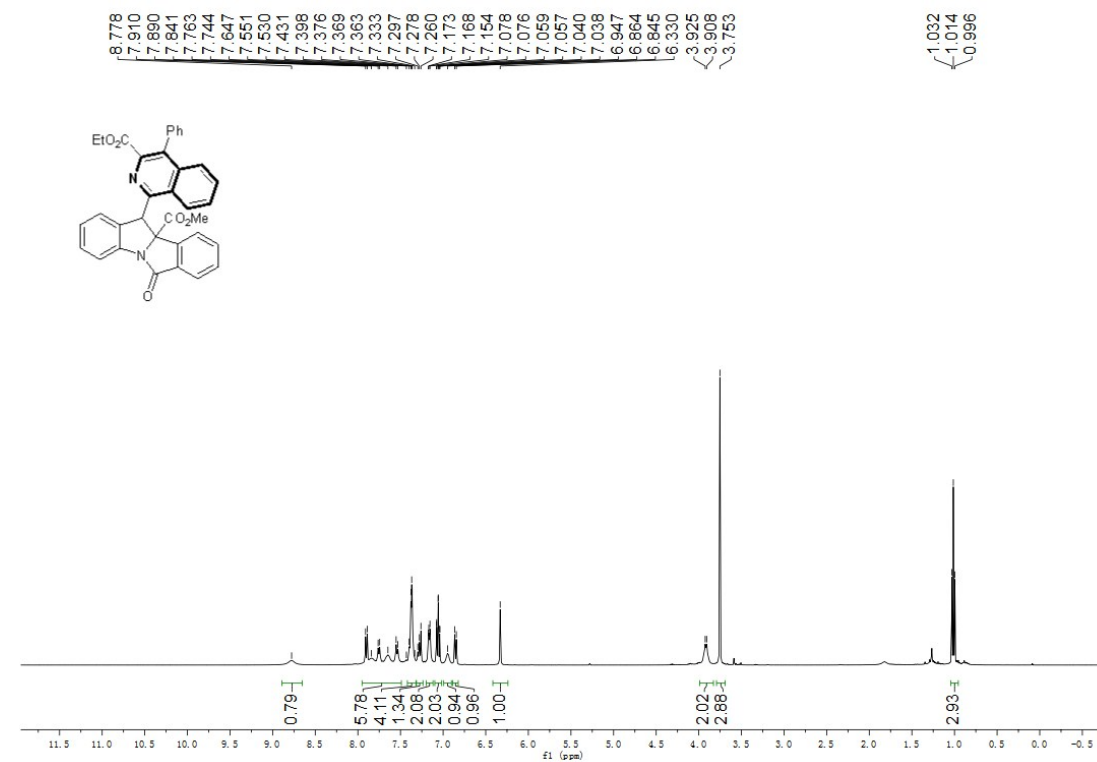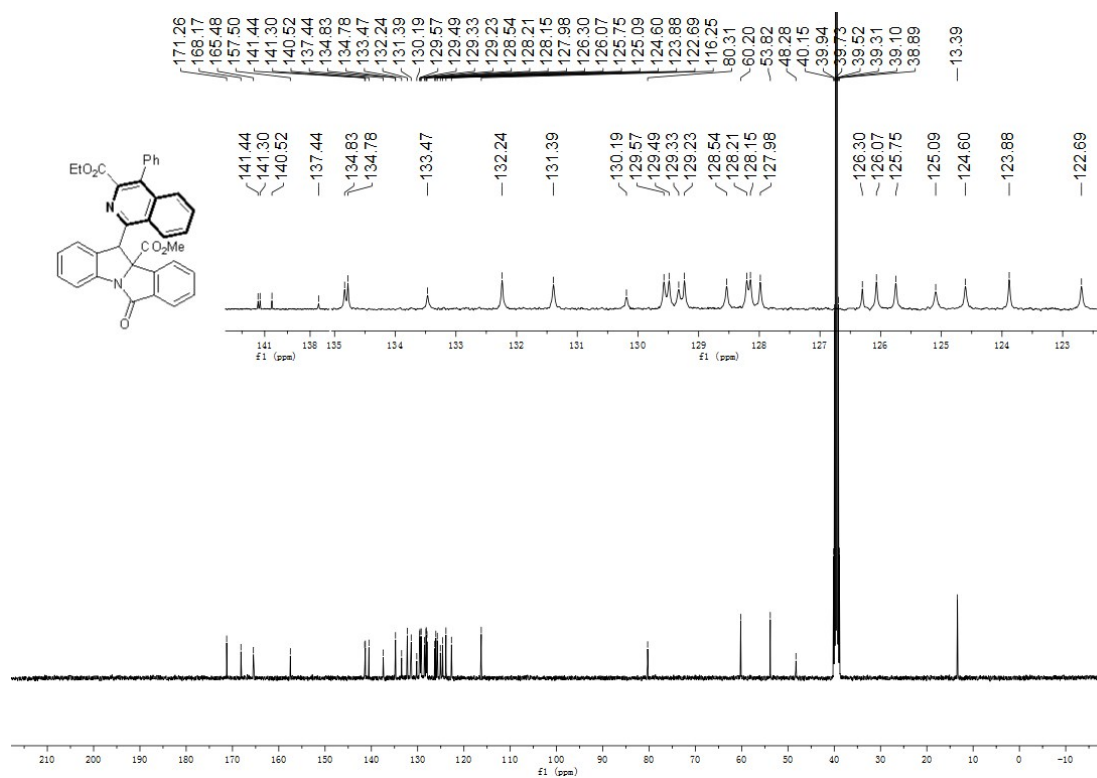

6

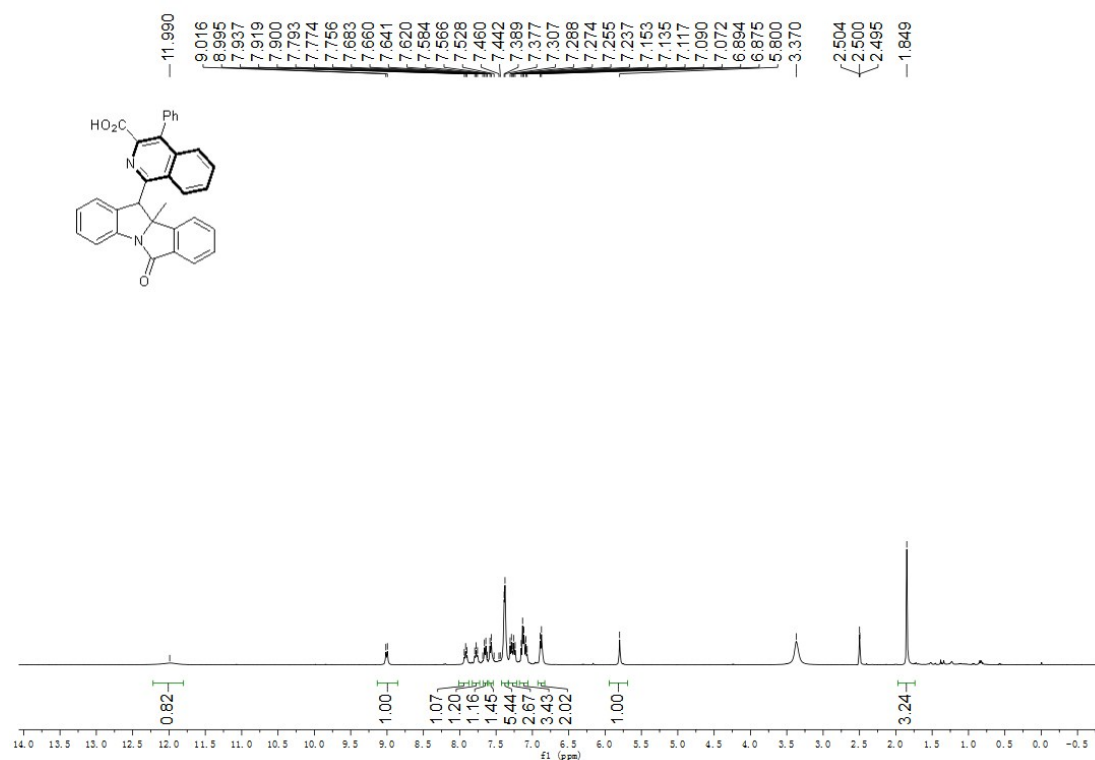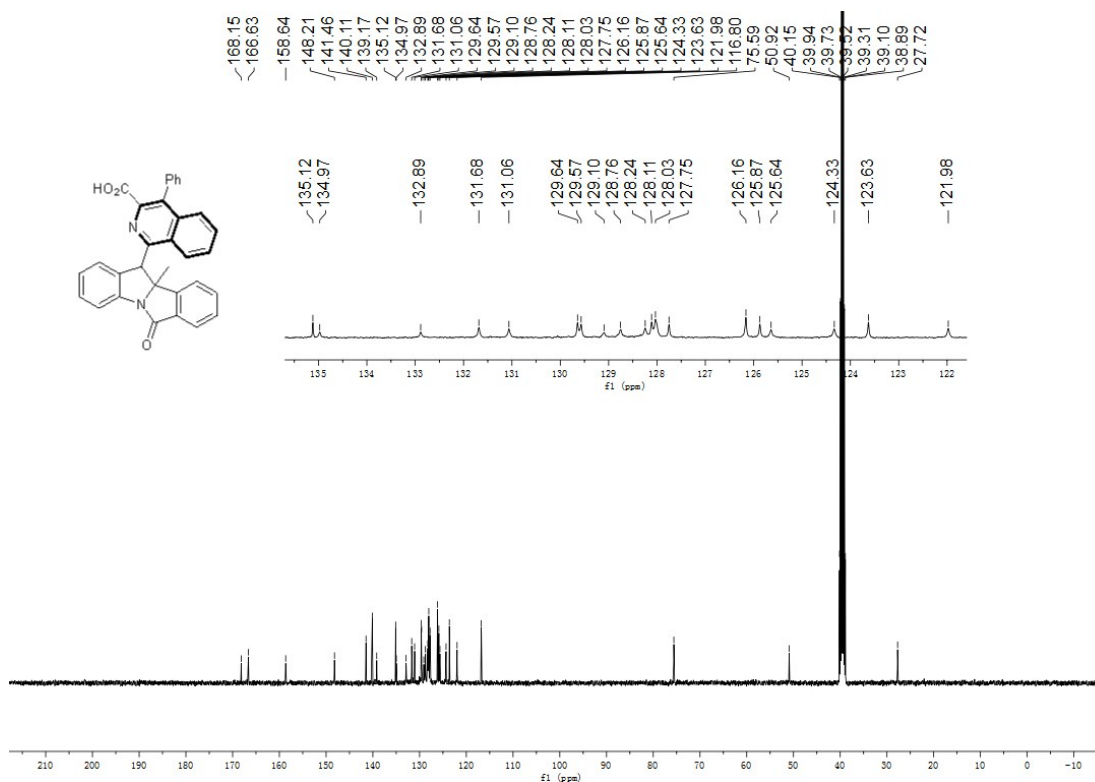

7

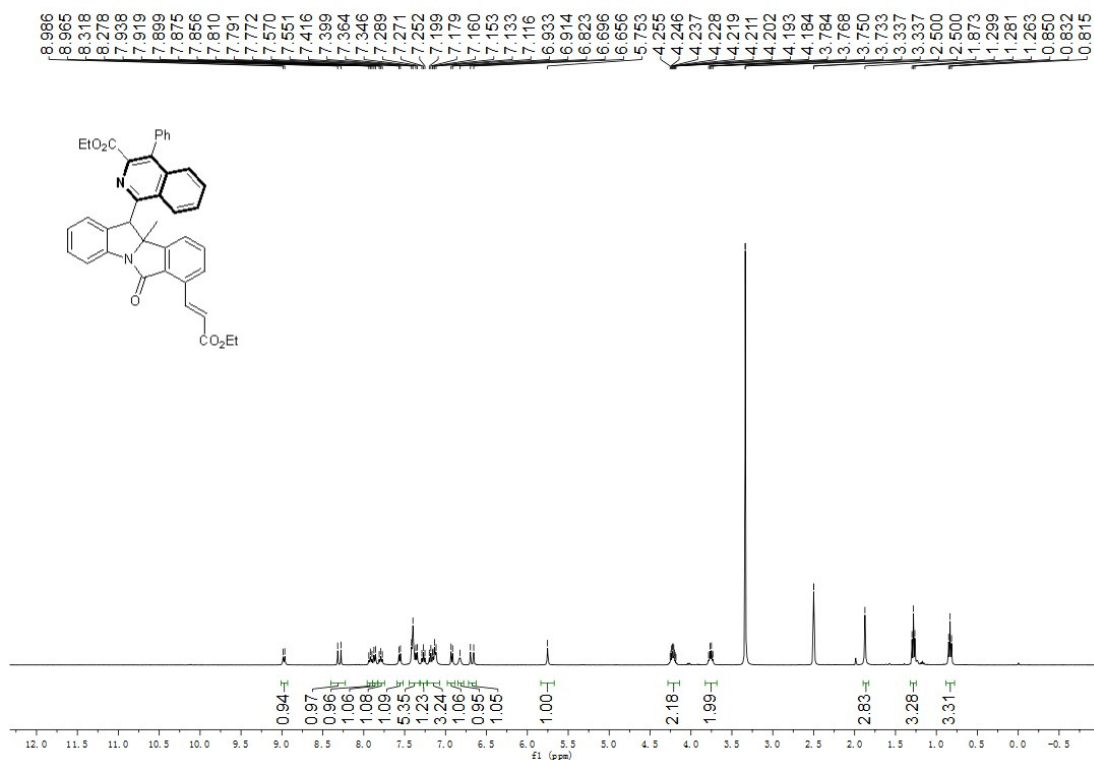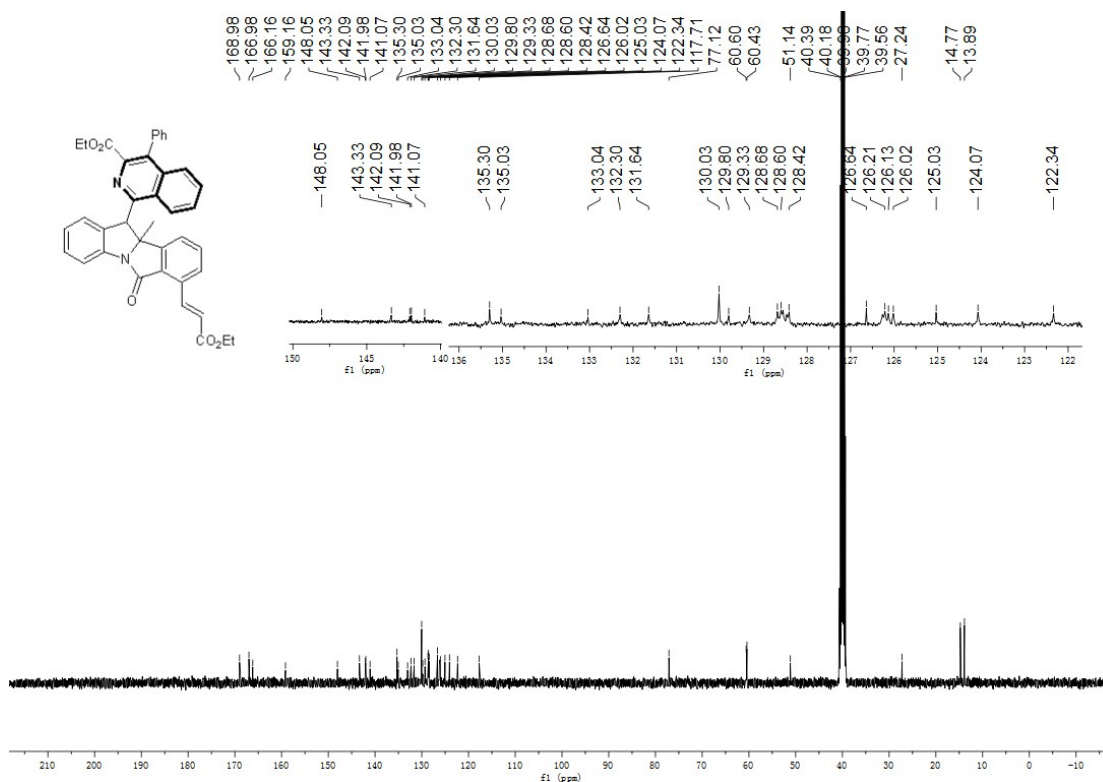

8

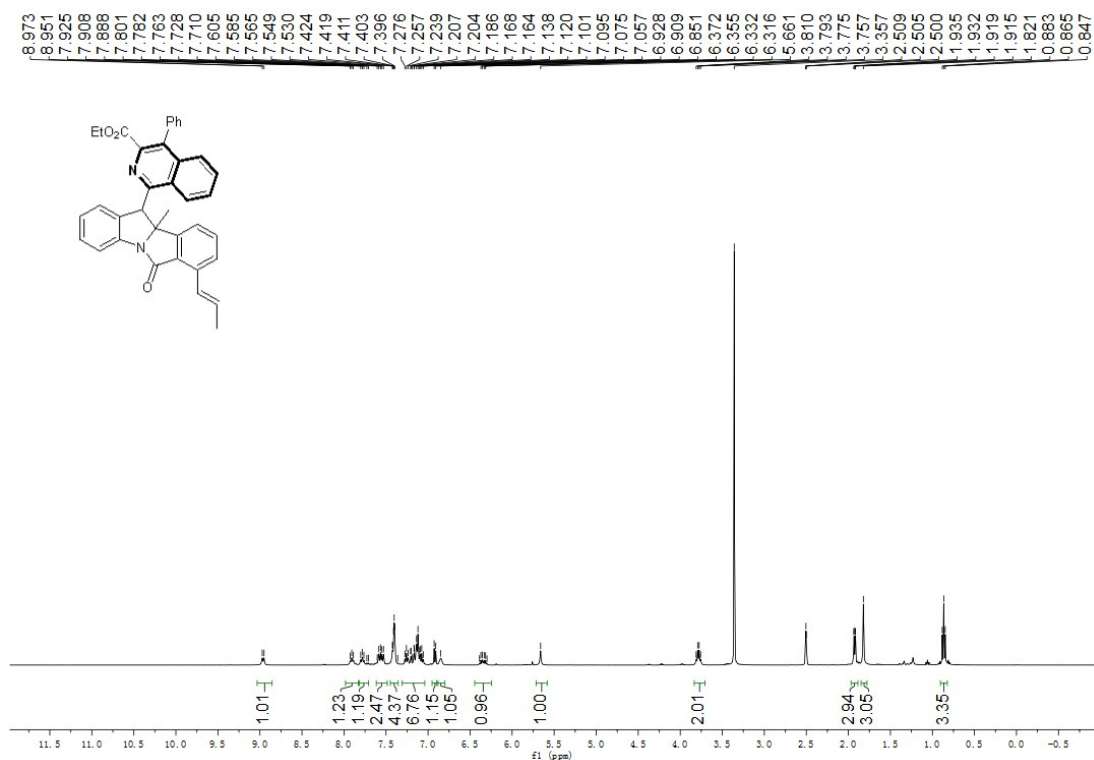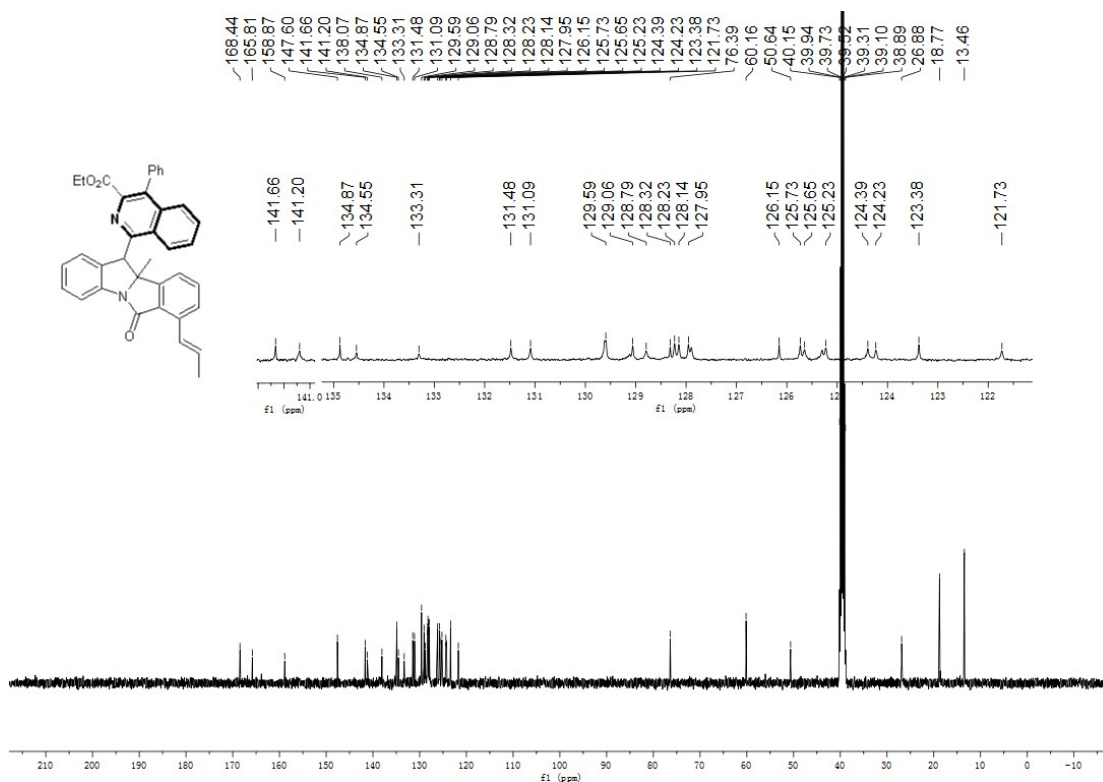

Supplement: d0cc00402b1.pdf [file d0cc00402b1.pdf]
